# Supplementary material for: Cyclization of alkynoic acids in water in the presence of a vesicular self-assembled amphiphilic pincer palladium complex catalyst
Source: Royal Society of Chemistry journal article supplement (doi:10.1039/c4cc07015a), 2014-01-01
Supplement: c4cc07015a1.pdf [file c4cc07015a1.pdf]

**Supporting Information**  
**for**  
**Cyclization of alkynoic acids in water**  
**in the presence of a vesicular self-assembled amphiphilic pincer**  
**palladium complex catalyst**

Go Hamasala,<sup>a</sup> and Yasuhiro Uozumi<sup>\*a,b,c</sup>

<sup>a</sup>Institute for Molecular Science (IMS), Higashiyama 5-1, Myodaiji, Okazaki 444-8787,  
Japan

<sup>b</sup>JST-CREST, Higashiyama 5-1, Myodaiji, Okazaki 444-8787, Japan

<sup>c</sup>Riken, Wako 351-0198, Japan

E-mail: uo@ims.ac.jp

Contents:

|                                                                       |         |
|-----------------------------------------------------------------------|---------|
| General experiments remarks                                           | S2      |
| Preparation of alkynoic acids <b>2</b>                                | S2-S10  |
| Cyclization of alkynoic acids <b>2</b>                                | S10-S15 |
| Preparation of 2-phenylpropargyloxyphenol <b>4</b>                    | S16-S18 |
| Cyclization of 2-phenylpropargyloxyphenol <b>4</b>                    | S18-S19 |
| <sup>1</sup> H and <sup>13</sup> C{ <sup>1</sup> H} NMR spectral data | S20-S61 |

## Experimental Section

**General.** When manipulations were performed under a nitrogen atmosphere, nitrogen gas was dried by passage through P<sub>2</sub>O<sub>5</sub>. Commercially available chemicals (purchased from Aldrich, TCI, Kanto, Wako, Nakalai, and AlfaAfer) are used without further purification unless otherwise noted. NMR spectra recorded on a JEOL JNM-A500 spectrometer (500 MHz for <sup>1</sup>H, 125 MHz for <sup>13</sup>C) or a JEOL ECS-400 spectrometer (396 MHz for <sup>1</sup>H, 100 MHz for <sup>13</sup>C). Chemical shifts are reported in δ ppm referenced to an internal tetramethylsilane standard for <sup>1</sup>H NMR. Chemical shifts of <sup>13</sup>C NMR are given related to CDCl<sub>3</sub> as an internal standard (δ 77.0). <sup>1</sup>H and <sup>13</sup>C NMR spectra were recorded in CDCl<sub>3</sub> at 25 °C unless otherwise noted. HREI mass spectra were recorded on a JEOL AccuTOF GC JMS-T100GC equipped with Agilent 6890N GC. EI mass spectra were recorded on an Agilent 5973N equipped with Agilent 6890N GC. Melting points were determined using a Yanaco micro melting point apparatus MP-J3 and are uncorrected. IR spectra were obtained using a JASCO FT/IR-460plus spectrometer in ATR mode. Millipore water was obtained from a Millipore Milli-Q Biocel A10 purification unit.

### Preparation of alkynoic acids **2**

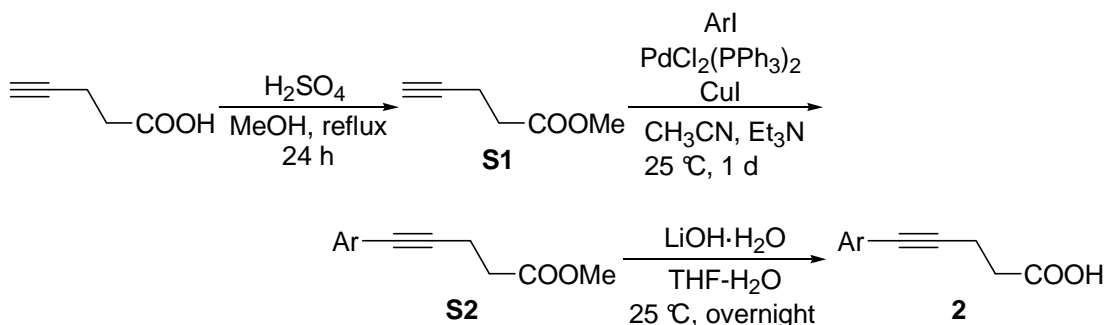

**Scheme S1.** Preparation of alkynoic acids **2**.

### Methyl-4-pentynoate (S1)

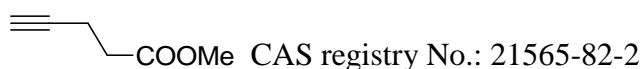

To a stirred MeOH (50 mL) solution of 4-pentynoic acid (5.00 g, 50.7 mmol) was added H<sub>2</sub>SO<sub>4</sub> (1.63 mL, 30.6 mmol). After refluxing for 24 h, the reaction mixture was quenched by the addition of saturated sodium bicarbonate aqueous solution and the resulting solution was extracted with CH<sub>2</sub>Cl<sub>2</sub> (30 mL × 3). The obtained organic layer was dried over magnesium sulfate. The solution was concentrated in vacuo to give

methyl-4-pentynoate (**S1**, 5.35 g, 47.7 mmol, 94.0%) as pale yellow oil.

$^1\text{H NMR}$  (396 MHz,  $\text{CDCl}_3$ )  $\delta$  1.97–1.99 (m, 1H, CCH), 2.48–1.60 (m, 4H,  $\text{CH}_2\text{CH}_2$ ), 3.71 (s, 3H,  $\text{COOCH}_3$ );  $^{13}\text{C}\{^1\text{H}\}$  NMR (100 MHz,  $\text{CDCl}_3$ )  $\delta$  14.2, 33.0, 51.7, 68.9, 82.3, 172.1; MS (EI)  $m/z$  = 111 ( $[\text{M}+1]^+$ ).

### General procedure for the Sonogashira coupling reaction of **S1** with **ArI**.

A typical procedure is given for the Sonogashira reaction of methyl-4-pentynoate with 4-trifluoromethyliodobenzene. To a suspension of  $\text{PdCl}_2(\text{PPh}_3)_2$  (125 mg, 0.178 mmol) and copper iodide (68 mg, 0.357 mmol) in triethylamine (3 mL), methyl-4-pentynoate (**S1**, 1.00 g, 8.92 mmol) in anhydrous  $\text{CH}_3\text{CN}$  (1 mL) and 4-trifluoromethyliodobenzene (2.67 g, 9.81 mmol) were added. After being stirred for 1 day, saturated  $\text{NH}_4\text{Cl}$  aqueous solution (15 mL) was added to the reaction mixture and the resulting solution was extracted with AcOEt (15 mL, 4 times). The combined organic layer was dried over  $\text{Na}_2\text{SO}_4$ . After evaporation of the solvent, the resulting residue was chromatographed on silica gel (eluent: 0-5% AcOEt/*n*-hexane) to give methyl 5-(4-trifluoromethylphenyl)-4-pentynoate (**S2a**, 1.85 g, 7.21 mmol, 81%) as pale yellow oil.

### Methyl 5-(4-trifluoromethylphenyl)-4-pentynoate (**S2a**)

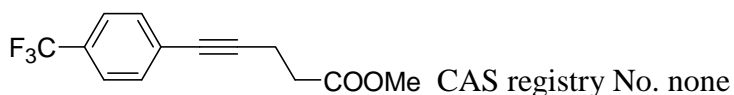

81% yield; Pale yellow oil;  $^1\text{H NMR}$  (500 MHz,  $\text{CDCl}_3$ )  $\delta$  2.65 (t,  $J$  = 8 Hz, 2H,  $\text{CH}_2$ ), 2.75 (t,  $J$  = 8 Hz, 2H,  $\text{CH}_2$ ), 3.73 (s, 3H,  $\text{CH}_3$ ), 7.48 (d,  $J$  = 8 Hz, 2H, ArH), 7.53 (d,  $J$  = 8 Hz, 2H, ArH);  $^{13}\text{C}\{^1\text{H}\}$  NMR (125 MHz,  $\text{CDCl}_3$ )  $\delta$  15.3, 33.1, 51.8, 80.0, 90.7, 123.9 (q,  $J_{\text{C-F}}$  = 270 Hz), 125.1 (q,  $J_{\text{C-F}}$  = 4 Hz), 128.3 (q,  $J_{\text{C-F}}$  = 261 Hz), 129.7, 131.8, 172.8; IR (ATR) 2999, 2955, 1738 (C=O), 1616, 1438, 1406, 1366, 1321 ( $\text{CF}_3$ ), 1255, 1199, 1163, 1121, 1104, 1066, 1038, 1017, 989, 889, 840, 777, 738, 693, 597  $\text{cm}^{-1}$ ; HR-EI-MS Calcd. for  $\text{C}_{13}\text{H}_{11}\text{F}_3\text{O}_2$   $[\text{M}]^+$ :  $m/z$  = 256.07111; Found 256.07061.

### Methyl 5-phenyl-4-pentynoate (**S2b**)

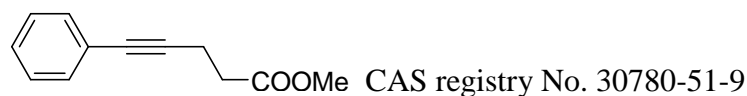

68% yield; Colorless oil;  $^1\text{H NMR}$  (500 MHz,  $\text{CDCl}_3$ )  $\delta$  2.62–2.67 (m, 2H,  $\text{CH}_2$ ), 2.71–2.76 (m, 2H,  $\text{CH}_2$ ), 3.72 (s, 3H,  $\text{CH}_3$ ), 7.26–7.30 (m, 3H, ArH), 7.37–7.40 (m, 2H,

ArH);  $^{13}\text{C}\{^1\text{H}\}$  NMR (125 MHz,  $\text{CDCl}_3$ )  $\delta$  15.3, 33.4, 51.8, 81.2, 87.9, 123.5, 127.8, 128.2, 131.6, 172.4; MS (EI)  $m/z$  = 188 ( $[\text{M}^+]$ ).

#### Methyl 5-(4-methylphenyl)-4-pentynoate (S2c)

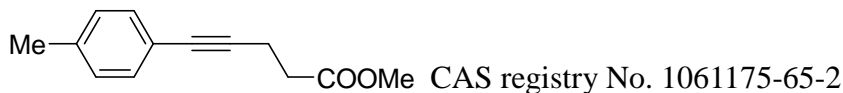

75% yield; Color less oil;  $^1\text{H}$  NMR (395 MHz,  $\text{CDCl}_3$ )  $\delta$  2.32 (s, 3H,  $\text{CH}_3$ ), 2.61–2.66 (m, 2H,  $\text{CH}_2$ ), 2.70–2.75 (m, 2H,  $\text{CH}_2$ ), 3.72 (s, 3H,  $\text{CH}_3$ ), 7.08 (d,  $J$  = 8 Hz, 2H, ArH), 7.27 (d,  $J$  = 8 Hz, 2H, ArH);  $^{13}\text{C}\{^1\text{H}\}$  NMR (100 MHz,  $\text{CDCl}_3$ )  $\delta$  15.3, 21.4, 33.5, 51.8, 81.2, 87.1, 120.3, 128.9, 131.4, 137.8, 172.4; MS (EI)  $m/z$  = 202 ( $[\text{M}^+]$ ).

#### Methyl 5-(4-methoxyphenyl)-4-pentynoate (S2d)

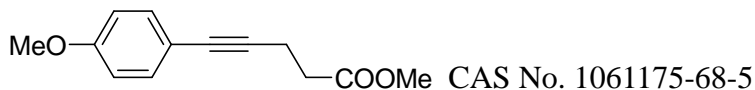

78% yield; Colorless oil;  $^1\text{H}$  NMR (500 MHz,  $\text{CDCl}_3$ )  $\delta$  2.60–2.64 (m, 2H,  $\text{CH}_2$ ), 2.69–2.73 (t, 2H,  $\text{CH}_2$ ), 3.71 (s, 3H,  $\text{CH}_3$ ), 3.78 (s, 3H,  $\text{CH}_3$ ), 6.80 (d,  $J$  = 9 Hz, 2H, ArH), 7.31 (d,  $J$  = 9 Hz, 2H, ArH);  $^{13}\text{C}\{^1\text{H}\}$  NMR (125 MHz,  $\text{CDCl}_3$ )  $\delta$  15.3, 33.5, 51.7, 55.1, 80.9, 86.3, 113.7, 115.5, 132.9, 159.1, 172.4; MS (EI)  $m/z$  = 218 ( $[\text{M}^+]$ ).

#### Methyl 5-(4-tert-butylphenyl)-4-pentynoate (S2e)

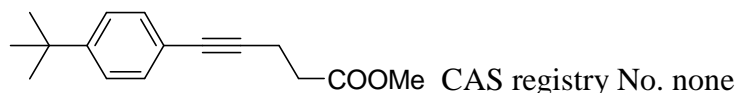

47% yield (from 4-tert-butylbromobenzene: 5 mol%  $\text{PdCl}_2(\text{PPh}_3)_2$  and 10 mol% CuI were used. The reaction performed in a mixture of  $i\text{Pr}_2\text{NH}$  and toluene at 85 °C); Pale yellow oil;  $^1\text{H}$  NMR (396 MHz,  $\text{CDCl}_3$ )  $\delta$  1.29 (s, 9H,  $\text{C}(\text{CH}_3)_3$ ), 2.61–2.65 (m, 2H,  $\text{CH}_2$ ), 2.70–2.75 (m, 2H,  $\text{CH}_2$ ), 3.71 (s, 3H,  $\text{CH}_3$ ), 7.28–7.33 (m, 4H, ArH);  $^{13}\text{C}\{^1\text{H}\}$  NMR (100 MHz,  $\text{CDCl}_3$ )  $\delta$  15.3, 33.1, 33.5, 34.6, 51.8, 81.1, 87.1, 120.4, 125.1, 131.2, 150.9, 172.4; IR (ATR) 2959, 2905, 2869, 1737 (C=O), 1648, 1608, 1506, 1459, 1437, 1419, 1396, 1363, 1268, 1256, 1223, 1198, 1166, 1110, 1018, 991, 834, 779, 705, 562  $\text{cm}^{-1}$ ; HR-EI-MS Calcd. for  $\text{C}_{16}\text{H}_{20}\text{O}_2$   $[\text{M}]^+$ :  $m/z$  = 244.14633; Found 244.14619.

#### Methyl 5-(4-phenylphenyl)-4-pentynoate (S2f)

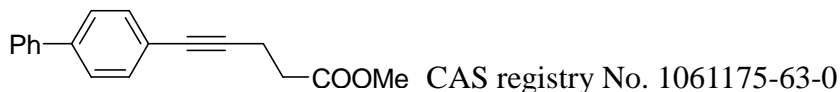

75% yield; Pale yellow oil;  $^1\text{H NMR}$  (500 MHz,  $\text{CDCl}_3$ )  $\delta$  2.65 (t,  $J = 8$  Hz, 2H,  $\text{CH}_2$ ), 2.76 (t,  $J = 8$  Hz, 2H,  $\text{CH}_2$ ), 3.72 (s, 3H,  $\text{CH}_3$ ), 7.32–7.36 (m, 1H, ArH), 7.41–7.46 (m, 4H, ArH), 7.52 (d,  $J = 8$  Hz, 2H, ArH), 7.57 (d,  $J = 8$  Hz, 2H, ArH);  $^{13}\text{C}\{^1\text{H}\}$  NMR (125 MHz,  $\text{CDCl}_3$ )  $\delta$  15.4, 33.4, 51.8, 81.0, 88.6, 122.4, 126.8, 126.9, 127.4, 128.7, 131.9, 140.3, 140.5, 172.3; MS (EI)  $m/z = 264$  ( $[\text{M}]^+$ ).

#### Methyl 5-(4-nitrophenyl)-4-pentynoate (S2g)

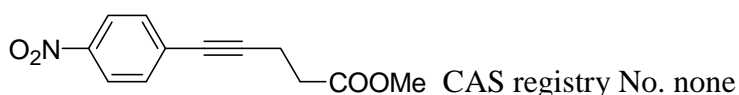

85% yield; Yellow solids; **Mp.** 88.5-89.5 °C;  $^1\text{H NMR}$  (500 MHz,  $\text{CDCl}_3$ )  $\delta$  2.66 (t,  $J = 7$  Hz, 2H,  $\text{CH}_2$ ), 2.78 (t,  $J = 7$  Hz, 2H,  $\text{CH}_2$ ), 3.74 (s, 3H,  $\text{CH}_3$ ), 7.51 (d,  $J = 9$ , 4 Hz, 2H, ArH), 8.15 (d,  $J = 9$  Hz, 2H, ArH);  $^{13}\text{C}\{^1\text{H}\}$  NMR (125 MHz,  $\text{CDCl}_3$ )  $\delta$  15.3, 32.9, 51.8, 79.6, 94.0, 123.4, 130.4, 132.2, 146.7, 171.9; **IR (ATR)** 3113, 2951, 2844, 2219 (CC), 1730 (C=O), 1591, 1509 ( $\text{NO}_2$ ), 1491, 1434, 1372, 1339, 1309, 1300, 1285, 1273, 1256, 1198, 1173, 1108, 1054, 1011, 986, 971, 887, 852, 831, 775, 749, 687, 591, 580  $\text{cm}^{-1}$ ; **HR-EI-MS** Calcd. for  $\text{C}_{12}\text{H}_{11}\text{NO}_4$   $[\text{M}]^+$ :  $m/z = 233.06881$ ; Found 233.06890.

#### Methyl 5-(4-fluorophenyl)-4-pentynoate (S2h)

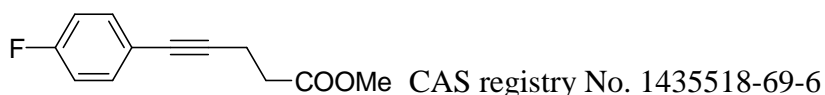

74% yield; Colorless oil;  $^1\text{H NMR}$  (500 MHz,  $\text{CDCl}_3$ )  $\delta$  2.63 (t,  $J = 8$  Hz, 2H,  $\text{CH}_2$ ), 2.72 (t,  $J = 8$  Hz, 2H,  $\text{CH}_2$ ), 3.72 (s, 3H,  $\text{CH}_3$ ), 6.94–6.99 (m, 2H, ArH), 7.33–7.37 (m, 2H, ArH);  $^{13}\text{C}\{^1\text{H}\}$  NMR (125 MHz,  $\text{CDCl}_3$ )  $\delta$  15.2, 33.3, 51.8, 80.1, 87.6, 115.3 (d,  $J_{\text{C-F}} = 22$  Hz), 119.5 (d,  $J_{\text{C-F}} = 4$  Hz), 133.3 (d,  $J_{\text{C-F}} = 8$  Hz), 162.1 (d,  $J_{\text{C-F}} = 248$  Hz), 172.3; MS (EI)  $m/z = 206$  ( $[\text{M}]^+$ ).

#### Methyl 5-(4-chlorophenyl)-4-pentynoate (S2i)

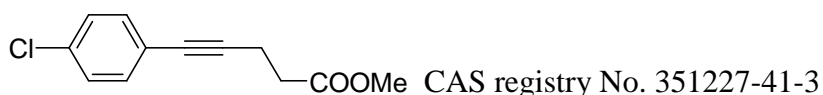

79% yield; Colorless oil;  $^1\text{H NMR}$  (500 MHz,  $\text{CDCl}_3$ )  $\delta$  2.62 (t,  $J = 8$  Hz, 2H,  $\text{CH}_2$ ), 2.72 (t,  $J = 8$  Hz, 2H,  $\text{CH}_2$ ), 3.71 (s, 3H,  $\text{CH}_3$ ), 7.24 (d,  $J = 9$  Hz, 2H, ArH), 7.30 (d,  $J = 9$  Hz, 2H, ArH);  $^{13}\text{C}\{^1\text{H}\}$  NMR (125 MHz,  $\text{CDCl}_3$ )  $\delta$  15.3, 33.2, 51.8, 80.1, 89.0, 122.0, 128.5, 132.8, 133.7, 172.2; MS (EI)  $m/z = 222$  ( $[\text{M}]^+$ ).

### Methyl 5-(2-methylphenyl)-4-pentynoate (S2j)

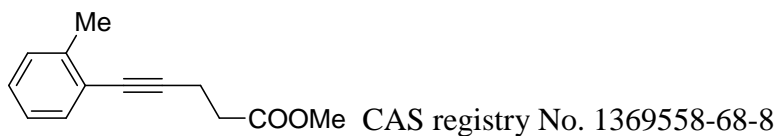

74% yield; Colorless oil;  $^1\text{H NMR}$  (500 MHz,  $\text{CDCl}_3$ )  $\delta$  2.39 (s, 3H,  $\text{CH}_3$ ), 2.65 (t,  $J = 7$  Hz, 2H,  $\text{CH}_2$ ), 2.77 (t,  $J = 7$  Hz, 2H,  $\text{CH}_2$ ), 3.72 (s, 3H,  $\text{CH}_3$ ), 7.07–7.12 (m, 1H,  $\text{ArH}$ ), 7.15–7.18 (m, 2H,  $\text{ArH}$ ), 7.34 (d,  $J = 7$  Hz, 1H,  $\text{ArH}$ );  $^{13}\text{C}\{^1\text{H}\}$  NMR (125 MHz,  $\text{CDCl}_3$ )  $\delta$  15.5 ( $\text{CH}_2$ ), 20.6 ( $\text{CH}_3$ ), 33.6 ( $\text{CH}_2$ ), 51.7 ( $\text{CH}_3$ ), 80.1 (CC), 91.9 (CC), 123.2 (ArC), 125.3 (ArC), 127.8 (ArC), 129.3 (ArC), 131.8 (ArC), 140.0 (ArC), 172.4 (C=O); MS (EI)  $m/z = 202$  ( $[\text{M}^+]$ ).

### Methyl 5-(1-naphthyl)-4-pentynoate (S2k)

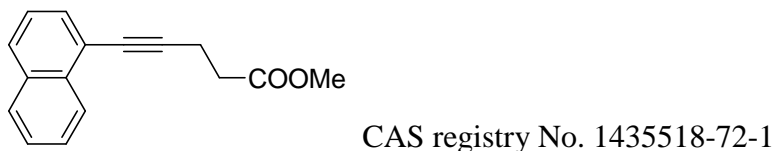

71% yield; Colorless oil;  $^1\text{H NMR}$  (500 MHz,  $\text{CDCl}_3$ )  $\delta$  2.73 (t,  $J = 8$  Hz, 2H,  $\text{CH}_2$ ), 2.89 (t,  $J = 8$  Hz, 2H,  $\text{CH}_2$ ), 3.74 (s, 3H,  $\text{CH}_3$ ), 7.38 (dd,  $J = 8, 8$  Hz, 1H,  $\text{ArH}$ ), 7.49 (ddd,  $J = 1, 7, 8$  Hz, 1H,  $\text{ArH}$ ), 7.54 (ddd,  $J = 1, 8, 9$  Hz, 1H,  $\text{ArH}$ ), 7.60 (dd,  $J = 1, 7$  Hz, 1H,  $\text{ArH}$ ), 7.77 (d,  $J = 8$  Hz,  $\text{ArH}$ ), 7.82 (d,  $J = 8$  Hz, 1H,  $\text{ArH}$ ), 8.30 (d,  $J = 9$  Hz, 1H,  $\text{ArH}$ );  $^{13}\text{C}\{^1\text{H}\}$  NMR (125 MHz,  $\text{CDCl}_3$ )  $\delta$  15.7, 33.6, 51.8, 79.2, 92.9, 121.1, 125.1, 126.1, 126.2, 126.5, 128.1, 128.2, 130.1, 133.1, 133.4, 172.3; MS (EI)  $m/z = 238$  ( $[\text{M}^+]$ ).

### Methyl 5-(2-thienyl)-4-pentynoate (S2l)

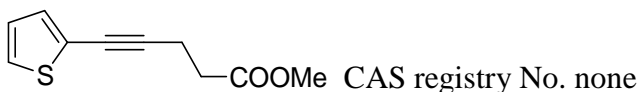

67% yield; Colorless oil;  $^1\text{H NMR}$  (500 MHz,  $\text{CDCl}_3$ )  $\delta$  2.63 (t,  $J = 8$  Hz, 2H,  $\text{CH}_2$ ), 2.75 (t,  $J = 8$  Hz, 2H,  $\text{CH}_2$ ), 3.72 (s, 3H,  $\text{CH}_3$ ), 6.92–6.94 (dd,  $J = 4, 4$  Hz, 1H,  $\text{ArH}$ ), 7.13 (d,  $J = 4$  Hz, 1H,  $\text{ArH}$ ), 7.18 (d,  $J = 4$  Hz, 1H,  $\text{ArH}$ );  $^{13}\text{C}\{^1\text{H}\}$  NMR (125 MHz,  $\text{CDCl}_3$ )  $\delta$  15.5, 33.1, 51.8, 74.3, 91.9, 123.5, 126.2, 126.7, 131.3, 172.4; IR (ATR) 3107, 2996, 2952, 2920, 2844, 1735 (C=O), 1519, 1436, 1362, 1290, 1256, 1239, 1192, 1165, 1081, 1038, 1019, 980, 942, 880, 865, 832, 779, 698, 656, 592, 572  $\text{cm}^{-1}$ ; HR-EI-MS Calcd. for  $\text{C}_{10}\text{H}_{10}\text{O}_2\text{S}$   $[\text{M}]^+$ :  $m/z = 194.0401$ ; Found 194.0400.

### General procedure for hydrolysis of methyl esters

A typical procedure is given for the reaction of methyl 5-(4-trifluoromethylphenyl)-4-pentynoate (**S2a**). To a solution of methyl 5-(4-trifluoromethylphenyl)-4-pentynoate (1.84 g, 7.19 mmol) in a mixture of THF (80 mL) and H<sub>2</sub>O (20 mL), lithium hydroxide monohydrate (603 mg, 14.4 mmol) was added. After being stirred at 25 °C for overnight, the mixture was washed with *tert*-butyl methyl ether (20 mL, 3 times) and acidified with 4N HCl aqueous solution. The organic layer was extracted with *tert*-butyl methyl ether (20 mL, 3 times), dried over Na<sub>2</sub>SO<sub>4</sub>, and concentrated in *vacuo* to give 5-(4-trifluoromethylphenyl)-4-pentynoic acid (**2a**, 1.64 g, 6.77 mmol, 94%) as white solids.

### 5-[(4-Trifluoromethyl)phenyl]pent-4-ynoic acid (**2a**)

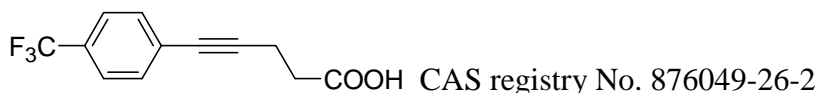

94% yield; White solids; <sup>1</sup>H NMR (396 MHz, CDCl<sub>3</sub>) δ 2.69–2.79 (m, 4H, CH<sub>2</sub>), 7.47 (d, *J* = 8 Hz, 2H, ArH), 7.53 (d, *J* = 8 Hz, 2H, ArH); <sup>13</sup>C{<sup>1</sup>H} NMR (100 MHz, CDCl<sub>3</sub>) δ 15.0, 33.2, 80.2, 90.3, 123.2 (q, *J*<sub>C-F</sub> = 272 Hz<sub>3</sub>), 125.1 (q, *J*<sub>C-F</sub> = 4 Hz), 127.2, 129.6 (q, *J*<sub>C-F</sub> = 32 Hz), 131.8, 178.1; MS (EI) *m/z* = 242 ([M<sup>+</sup>]).

### 5-Phenylpent-4-ynoic acid (**2b**)

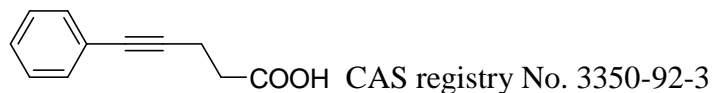

91% yield; White solids; <sup>1</sup>H NMR (396 MHz, CDCl<sub>3</sub>) δ 2.66–2.78 (m, 4H, CH<sub>2</sub>), 7.25–7.30 (m, 3H, ArH), 7.36–7.42 (m, 2H, ArH); <sup>13</sup>C{<sup>1</sup>H} NMR (100 MHz, CDCl<sub>3</sub>) δ 15.0, 33.4, 81.3, 87.5, 123.3, 127.9, 128.2, 131.6, 178.2; EI (70eV) *m/z* = 174 ([M<sup>+</sup>]).

### 5-[(4-Methyl)phenyl]pent-4-ynoic acid (**2c**)

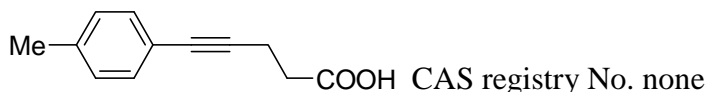

92% yield; White solids; **Mp.** 130.0–131.0 °C; <sup>1</sup>H NMR (396 MHz, CDCl<sub>3</sub>) δ 2.33 (s, 3H, CH<sub>3</sub>), 2.66–2.76 (m, 4H, CH<sub>2</sub>), 7.08 (d, *J* = 8 Hz, 2H, ArH), 7.28 (d, *J* = 8 Hz, 2H, ArH); <sup>13</sup>C{<sup>1</sup>H} NMR (100 MHz, CDCl<sub>3</sub>) δ 15.1, 21.4, 33.5, 81.4, 86.7, 120.2, 128.9, 131.4, 137.9, 178.2; IR (ATR) 3097, 3042, 3031, 2988, 2935, 2918, 2859, 2653, 2629, 2604, 2557, 2504, 1922, 1704 (C=O), 1508, 1424, 1407, 1357, 1303, 1261, 1211, 1175, 1106,

1045, 1021, 930, 822, 767, 692, 634  $\text{cm}^{-1}$ ; **HR-EI-MS** Calcd. for  $\text{C}_{12}\text{H}_{12}\text{O}_2$   $[\text{M}]^+$ :  $m/z = 188.08373$ ; Found 188.08348.

#### 5-[(4-Methoxy)phenyl]pent-4-ynoic acid (2d)

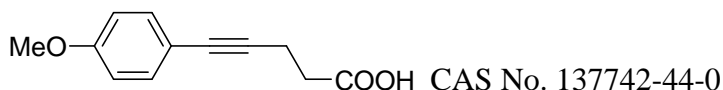

92% yield; White solids;  $^1\text{H NMR}$  (396 MHz,  $\text{CDCl}_3$ )  $\delta$  2.66–2.75 (m, 4H,  $\text{CH}_2$ ), 3.80 (s,  $\text{CH}_3$ ), 6.81 (d,  $J = 9$  Hz, 2H,  $\text{ArH}$ ), 7.32 (d,  $J = 9$  Hz, 2H,  $\text{ArH}$ );  $^{13}\text{C}\{^1\text{H}\}$  NMR (100 MHz,  $\text{CDCl}_3$ )  $\delta$  15.1, 33.5, 55.3, 81.1, 86.0, 113.8, 115.5, 133.0, 159.2, 178.1; **MS (EI)**  $m/z = 204$  ( $[\text{M}^+]$ ).

#### 5-[(4-tert-Butyl)phenyl]pent-4-ynoic acid (2e)

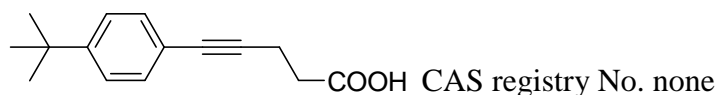

80% yield; White solids; **Mp.** 133.5–134.5  $^\circ\text{C}$ ;  $^1\text{H NMR}$  (396 MHz,  $\text{CDCl}_3$ )  $\delta$  1.30 (s, 9H,  $\text{C}(\text{CH}_3)_3$ ), 2.65–2.77 (m, 4H,  $\text{CH}_2$ ), 7.27–7.36 (m, 4H,  $\text{ArH}$ );  $^{13}\text{C}\{^1\text{H}\}$  NMR (100 MHz,  $\text{CDCl}_3$ )  $\delta$  15.1, 31.2, 33.4, 34.7, 81.3, 86.8, 120.3, 125.2, 131.2, 151.0, 177.9; **IR (ATR)** 3037, 2952, 2901, 2865, 2633, 2596, 2552, 2503, 1703 (C=O), 1505, 1462, 1428, 1409, 1362, 1299, 1267, 1259, 1213, 1109, 1019, 936, 837, 775, 754, 682, 562  $\text{cm}^{-1}$ ; **HR-EI-MS** Calcd. for  $\text{C}_{15}\text{H}_{18}\text{O}_2$   $[\text{M}]^+$ :  $m/z = 230.13068$ ; Found 230.13072.

#### 5-[(4-Phenyl)phenyl]pent-4-ynoic acid (2f)

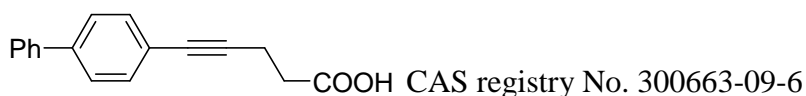

74% yield; Pale yellow solids;  $^1\text{H NMR}$  (396 MHz,  $\text{CDCl}_3$ )  $\delta$  2.69–2.80 (m, 4H,  $\text{CH}_2$ ), 7.32–7.37 (m, 1H,  $\text{ArH}$ ), 7.40–7.48 (m, 4H,  $\text{ArH}$ ), 7.50–7.54 (m, 2H,  $\text{ArH}$ ), 7.55–7.59 (m, 2H,  $\text{ArH}$ );  $^{13}\text{C}\{^1\text{H}\}$  NMR (100 MHz,  $\text{CDCl}_3$ )  $\delta$  15.2, 33.3, 81.2, 88.2, 122.3, 126.9, 127.0, 127.5, 128.76, 128.81, 132.0, 140.4, 140.6, 177.2; **EI (70eV)**  $m/z = 250$  ( $[\text{M}^+]$ ).

#### 5-[(4-Nitro)phenyl]pent-4-ynoic acid (2g)

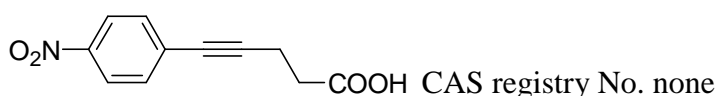

89% yield; Yellow solids; **Mp.** 157.0–158.0  $^\circ\text{C}$ ; **NMR (396 MHz,  $\text{CDCl}_3$ )**  $\delta$  2.70–2.75 (m, 2H,  $\text{CH}_2$ ), 2.77–2.82 (m, 2H,  $\text{CH}_2$ ), 7.52 (d,  $J = 9$  Hz, 1H,  $\text{ArH}$ ), 8.15 (d,  $J = 9$  Hz, 1H,



ArH);  $^{13}\text{C}\{^1\text{H}\}$  NMR (100 MHz,  $\text{CDCl}_3$ )  $\delta$  15.1, 32.9, 79.9, 93.5, 123.5, 130.3, 132.4, 146.8, 177.3; IR (ATR) 3110, 3086, 3028, 2978, 2930, 2845, 2808, 2792, 2710, 2647, 2614, 2560, 2511, 2465, 2445, 1694 (C=O), 1592, 1510 ( $\text{NO}_2$ ), 1432, 1407, 1339, 1317, 1305, 1286, 1275, 1261, 1212, 1172, 1103, 1096, 1011, 980, 922, 854, 776, 750, 689, 677  $\text{cm}^{-1}$ ; HR-EI-MS Calcd. for  $\text{C}_{11}\text{H}_9\text{NO}_4$   $[\text{M}]^+$ :  $m/z$  = 219.05316; Found 219.05341.

#### 5-[(4-Fluoro)phenyl]pent-4-ynoic acid (2h)

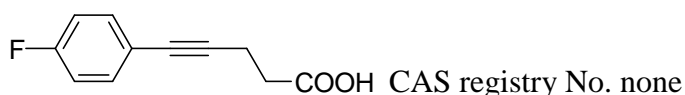

88% yield; White solids; **Mp** 112.5–113.5 °C;  $^1\text{H}$  NMR (396 MHz,  $\text{CDCl}_3$ )  $\delta$  2.65–2.76 (m, 4H,  $\text{CH}_2$ ), 6.94–7.00 (m, 2H, ArH), 7.33–7.39 (m, 2H, ArH);  $^{13}\text{C}\{^1\text{H}\}$  NMR (100 MHz,  $\text{CDCl}_3$ )  $\delta$  15.0, 33.4, 80.3, 87.2, 115.4 (d,  $J_{\text{C-F}}$  = 22 Hz), 119.4 (d,  $J_{\text{C-F}}$  = 4 Hz), 133.4 (d,  $J_{\text{C-F}}$  = 9 Hz), 162.2 (d,  $J_{\text{C-F}}$  = 249 Hz), 178.4; IR (ATR) 3102, 3064, 3045, 3033, 2979, 2964, 2936, 2919, 2852, 2710, 2632, 2560, 2512, 1703 (C=O), 1597, 1504, 1432, 1409, 1360, 1308, 1259, 1214, 1161, 1095, 1014, 979, 918, 841, 829, 814, 776, 699, 634  $\text{cm}^{-1}$ ; HR-EI-MS Calcd. for  $\text{C}_{11}\text{H}_9\text{FO}_2$   $[\text{M}]^+$ :  $m/z$  = 192.05866; Found 192.05871.

#### 5-[(4-Chloro)phenyl]pent-4-ynoic acid (2i)

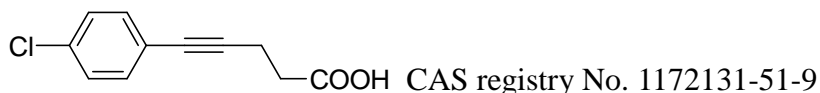

93% yield; White solids;  $^1\text{H}$  NMR (396 MHz,  $\text{CDCl}_3$ )  $\delta$  2.65–2.76 (m, 4H,  $\text{CH}_2$ ), 7.24 (d,  $J$  = 8 Hz, 2H, ArH), 7.30 (d,  $J$  = 8 Hz, 1H, ArH);  $^{13}\text{C}\{^1\text{H}\}$  NMR (100 MHz,  $\text{CDCl}_3$ )  $\delta$  15.0, 33.3, 80.3, 88.6, 121.8, 128.5, 132.8, 133.8, 178.4; EI (70eV)  $m/z$  = 208 ( $[\text{M}]^+$ ).

#### 5-[(2-Methyl)phenyl]pent-4-ynoic acid (2j)

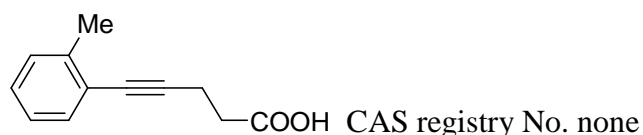

100% yield; White solids; **Mp** 61.0–62.0 °C;  $^1\text{H}$  NMR (500 MHz,  $\text{CDCl}_3$ )  $\delta$  2.38 (s, 3H,  $\text{CH}_3$ ), 2.69–2.73 (m, 2H,  $\text{CH}_2$ ), 2.77–2.81 (m, 2H,  $\text{CH}_2$ ), 7.07–7.12 (m, 1H, ArH), 7.14–7.19 (m, 2H, ArH), 7.34–7.36 (m, 1H, ArH);  $^{13}\text{C}\{^1\text{H}\}$  NMR (125 MHz,  $\text{CDCl}_3$ )  $\delta$  15.3, 20.6, 33.7, 80.3, 91.4, 123.1, 125.4, 127.8, 129.3, 131.8, 140.1, 178.1; IR (ATR) 3021, 2967, 2921, 2852, 2735, 2701, 2635, 2551, 2503, 1693 (C=O), 1487, 1432, 1411, 1351, 1302, 1289, 1253, 1212, 1176, 1161, 1114, 1044, 1017, 978, 918, 862, 803, 777, 748, 715,

664 cm<sup>-1</sup>; **HR-EI-MS** Calcd. for C<sub>12</sub>H<sub>12</sub>O<sub>2</sub> [M]<sup>+</sup>: *m/z* = 188.08373; Found 188.08375.

### 5-(1-Naphthyl)pent-4-ynoic acid (2k)

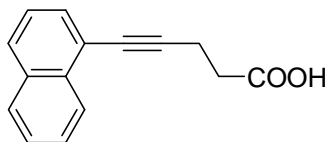

CAS registry No. 928768-34-7

91% yield; White solids; <sup>1</sup>H NMR (396 MHz, CDCl<sub>3</sub>) δ 2.78–2.84 (m, 2H, CH<sub>2</sub>), 2.88–2.93 (m, 2H, CH<sub>2</sub>), 7.39 (t, *J* = 8 Hz, 1H, ArH), 7.49 (td, *J* = 1, 7 Hz, 1H, ArH), 7.54 (td, *J* = 1, 7 Hz, 1H, ArH), 7.61 (d, *J* = 7 Hz, 1H, ArH), 7.78 (d, *J* = 8 Hz, ArH), 7.82 (d, *J* = 8 Hz, 1H, ArH), 8.32 (d, *J* = 8 Hz, 1H, ArH); <sup>13</sup>C{<sup>1</sup>H} NMR (100 MHz, CDCl<sub>3</sub>) δ 15.4, 33.6, 79.5, 92.5, 121.0, 125.2, 126.1, 126.3, 126.6, 128.2, 128.3, 130.2, 133.1, 133.4, 178.1; EI (70eV) *m/z* = 224 ([M<sup>+</sup>]).

### 5-(2-Thienyl)pent-4-ynoic acid (2l)

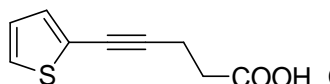

CAS No. 928768-35-8

86% yield; Pale brown solids; <sup>1</sup>H NMR (500 MHz, CDCl<sub>3</sub>) δ 2.68–2.72 (m, 2H, CH<sub>2</sub>), 2.74–2.78 (m, 2H, CH<sub>2</sub>), 6.93–6.95 (m, 1H, ArH), 7.13–7.14 (m, 1H, ArH), 7.18–7.20 (m, 1H, ArH); <sup>13</sup>C{<sup>1</sup>H} NMR (125 MHz, CDCl<sub>3</sub>) δ 15.3, 33.1, 74.6, 91.5, 123.4, 126.4, 126.8, 131.5, 177.9; EI (70eV) *m/z* = 180 ([M<sup>+</sup>]).

### General procedure for cyclization of alkynoic acids

A typical procedure is given for the reaction with 5-(4-trifluoromethylphenyl)pentynoic acid (**2a**) in the presence of **1a<sub>vscI</sub>** and Et<sub>3</sub>N in water (Table 1, entry 2). 5-(4-Trifluoromethylphenyl)pentynoic acid (**2a**, 29.1 mg, 0.12 mmol) was placed in a vial, to which was added 1 mL aqueous suspension of **1a<sub>vscI</sub>** (2.6 mg, 2.4 × 10<sup>-3</sup> mmol) and Et<sub>3</sub>N (1 mL, 7.2 × 10<sup>-3</sup> mmol). The reaction mixture was agitated by shaking at 50 °C for 1 h, and then extracted with t-butyl methyl ether (MTBE) (1.5 mL, 4 times). The combined extract was dried over Na<sub>2</sub>SO<sub>4</sub> and concentrated in *vacuo*. The residue was chromatographed on silica gel (eluent: CHCl<sub>3</sub>) to give **3a** (17.6 mg, 0.727 mmol, 61%).

**(Z)- $\gamma$ -(4-Trifluoromethylbenzylidene)- $\gamma$ -butyrolactone (3a)**

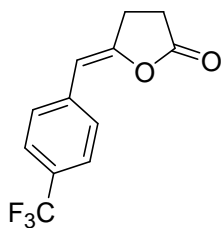

CAS registry No. none

White solids; **Mp** 56.5–57.0 °C;  **$^1\text{H NMR}$  (396 MHz,  $\text{CDCl}_3$ )**  $\delta$  2.73–2.78 (m, 2H,  $\text{CH}_2$ ), 3.05–3.11 (m, 2H,  $\text{CH}_2$ ), 5.58–5.60 (m, 1H,  $\text{C}=\text{CH}$ ), 7.56 (d,  $J = 8$  Hz, 2H,  $\text{ArH}$ ), 7.64 (d,  $J = 8$  Hz, 2H,  $\text{ArH}$ );  **$^{13}\text{C}\{^1\text{H}\}$  NMR (100 MHz,  $\text{CDCl}_3$ )**  $\delta$  26.4, 26.7, 103.7, 124.2 (q,  $J_{\text{C-F}} = 272$  Hz), 125.3 (q,  $J_{\text{C-F}} = 4$  Hz), 128.3 (q,  $J_{\text{C-F}} = 32$  Hz), 128.4, 137.5, 150.2, 174.5; **IR (ATR)** 2956, 2936, 1804 (C=O), 1680, 1614, 1443, 1415, 1323 ( $\text{CF}_3$ ), 1290, 1227, 1165, 1093, 1064, 1015, 939, 853, 815, 755, 708, 652, 597  $\text{cm}^{-1}$ ; **HR-EI-MS** Calcd. for  $\text{C}_{12}\text{H}_9\text{F}_3\text{O}_2$   $[\text{M}]^+$ :  $m/z = 242.05546$ ; Found 242.05518.

**(Z)- $\gamma$ -Benzylidene- $\gamma$ -butyrolactone (3b)**

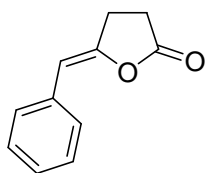

CAS registry No. 69063-20-3

White solids;  **$^1\text{H NMR}$  (396 MHz,  $\text{CDCl}_3$ )**  $\delta$  2.69–2.74 (m, 2H,  $\text{CH}_2$ ), 3.01–3.07 (m, 2H,  $\text{CH}_2$ ), 5.54–5.56 (m, 1H,  $\text{C}=\text{CH}$ ), 7.21 (t,  $J = 7$  Hz, 1H,  $\text{ArH}$ ), 7.33 (t,  $J = 7$  Hz, 2H,  $\text{ArH}$ ), 7.54 (d,  $J = 7$  Hz, 2H,  $\text{ArH}$ );  **$^{13}\text{C}\{^1\text{H}\}$  NMR (100 MHz,  $\text{CDCl}_3$ )**  $\delta$  26.3, 26.9, 104.9, 126.7, 128.3, 128.4, 133.8, 148.1, 174.9; **EIMS (70eV)**  $m/z = 174$  ( $[\text{M}]^+$ ).

**(Z)- $\gamma$ -(4-Methylbenzylidene)- $\gamma$ -butyrolactone (3c)**

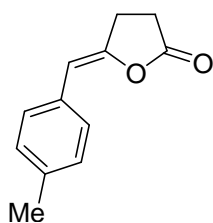

CAS registry No. none

White solids; **Mp** 85.0–86.0 °C;  **$^1\text{H NMR}$  (396 MHz,  $\text{CDCl}_3$ )**  $\delta$  2.34 (s, 3H,  $\text{CH}_3$ ), 2.68–2.73 (m, 2H,  $\text{CH}_2$ ), 3.00–3.06 (m, 2H,  $\text{CH}_2$ ), 5.51–5.53 (m, 1H,  $\text{C}=\text{CH}$ ), 7.13 (d,  $J = 8$  Hz, 2H,  $\text{ArH}$ ), 7.44 (d,  $J = 8$  Hz, 2H,  $\text{ArH}$ );  **$^{13}\text{C}\{^1\text{H}\}$  NMR (100 MHz,  $\text{CDCl}_3$ )**  $\delta$  21.1, 26.2, 27.0, 104.7, 128.1, 129.1, 131.0, 136.4, 147.3, 175.1; **IR (ATR)** 3024, 2982, 2923, 2872, 1792 (C=O), 1682, 1609, 1508, 1444, 1413, 1355, 1290, 1227, 1208, 1176, 1102,

1023, 1011, 992, 942, 857, 841, 803, 758, 714, 702, 656, 634, 563  $\text{cm}^{-1}$ ; **HR-EI-MS** Calcd. for  $\text{C}_{12}\text{H}_{12}\text{O}_2$   $[\text{M}]^+$ :  $m/z = 188.08373$ ; Found 188.08367.

**(Z)- $\gamma$ -(4-Methoxybenzylidene)- $\gamma$ -butyrolactone (3d)**

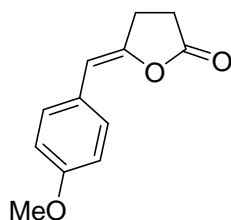

CAS registry No. none

Pale yellow oil;  $^1\text{H NMR}$  (396 MHz,  $\text{CDCl}_3$ )  $\delta$  2.68–2.73 (m, 2H,  $\text{CH}_2$ ), 2.99–3.05 (m, 2H,  $\text{CH}_2$ ), 3.81 (s,  $\text{OCH}_3$ ), 5.48–5.51 (m, 1H,  $\text{C}=\text{CH}$ ), 6.86 (d,  $J = 9$  Hz, 2H,  $\text{ArH}$ ), 7.49 (d,  $J = 9$  Hz, 2H,  $\text{ArH}$ );  $^{13}\text{C}\{^1\text{H}\}$  NMR (100 MHz,  $\text{CDCl}_3$ )  $\delta$  26.2, 27.0, 55.2, 104.3, 113.80, 126.6, 129.5, 146.4, 158.2, 175.1; **IR (ATR)** 3003, 2958, 2934, 2838, 1792 ( $\text{C}=\text{O}$ ), 1732, 1685, 1606, 1577, 1509, 1463, 1443, 1419, 1350, 1294, 1248, 1175, 1114, 1096, 1029, 941, 906, 848, 830, 815, 756, 722, 704, 657, 628, 597, 554  $\text{cm}^{-1}$ ; **HR-EI-MS** Calcd. for  $\text{C}_{12}\text{H}_{12}\text{O}_3$   $[\text{M}]^+$ :  $m/z = 204.07864$  Found 204.07866.

**(Z)- $\gamma$ -(4-*tert*-Butylbenzylidene)- $\gamma$ -butyrolactone (3e)**

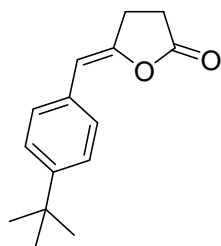

White solids; **Mp.** 34.0–35.0  $^\circ\text{C}$ ;  $^1\text{H NMR}$  (396 MHz,  $\text{CDCl}_3$ )  $\delta$  1.31 (s, 9H,  $\text{C}(\text{CH}_3)_3$ ), 2.68–2.73 (m, 2H,  $\text{CH}_2$ ), 3.00–3.05 (m, 2H,  $\text{CH}_2$ ), 5.53–5.54 (m, 1H,  $\text{C}=\text{CH}$ ), 7.35 (d,  $J = 9$  Hz, 2H,  $\text{ArH}$ ), 7.48 (d,  $J = 9$  Hz, 2H,  $\text{ArH}$ );  $^{13}\text{C}\{^1\text{H}\}$  NMR (100 MHz,  $\text{CDCl}_3$ )  $\delta$  26.2, 27.1, 31.2, 34.5, 104.7, 125.3, 128.0, 131.0, 147.5, 149.7, 175.0; **IR (ATR)** 2959, 2928, 2868, 1799 ( $\text{C}=\text{O}$ ), 1726, 1685, 1511, 1475, 1462, 1445, 1415, 1395, 1362, 1293, 1270, 1229, 1201, 1173, 1123, 1096, 1018, 941, 851, 836, 807, 705, 656, 575  $\text{cm}^{-1}$ ; **HR-EI-MS** Calcd. for  $\text{C}_{15}\text{H}_{18}\text{O}_2$   $[\text{M}]^+$ :  $m/z = 230.13068$ ; Found 230.13070.

**(Z)- $\gamma$ -(4-Phenylbenzylidene)- $\gamma$ -butyrolactone (3f)**

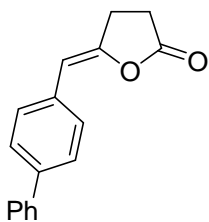

CAS registry No. none

Light brown solids; **Mp** 116.5–117.5 °C;  $^1\text{H NMR}$  (396 MHz,  $\text{CDCl}_3$ )  $\delta$  2.71–2.76 (m, 2H,  $\text{CH}_2$ ), 3.04–3.10 (m, 2H,  $\text{CH}_2$ ), 5.59–5.60 (m, 1H,  $\text{C}=\text{CH}$ ), 7.33–7.36 (m, 1H,  $\text{ArH}$ ), 7.41–7.44 (m, 2H,  $\text{ArH}$ ), 7.56–7.65 (m, 6H,  $\text{ArH}$ );  $^{13}\text{C}\{^1\text{H}\}$  NMR (100 MHz,  $\text{CDCl}_3$ )  $\delta$  26.3, 26.9, 104.5, 126.9, 127.1, 127.2, 128.7, 128.7, 128.8, 132.9, 139.3, 140.7, 148.3, 174.9; **IR (ATR)** 3031, 2932, 1793 ( $\text{C}=\text{O}$ ), 1678, 1604, 1593, 1554, 1486, 1449, 1414, 1294, 1234, 1218, 1208, 1181, 1097, 1103, 940, 913, 876, 852, 838, 809, 762, 723, 688, 659, 607, 570  $\text{cm}^{-1}$ ; **HR-EI-MS** Calcd. for  $\text{C}_{17}\text{H}_{14}\text{O}_2$   $[\text{M}]^+$ :  $m/z$  = 250.09938 Found 250.09936.

**(Z)- $\gamma$ -(4-Nitrobenzylidene)- $\gamma$ -butyrolactone (3g)**

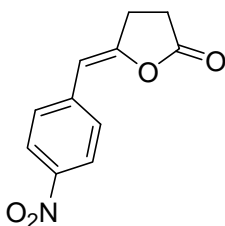

CAS registry No. none

Yellow solids; **Mp.** 120.0–121.0 °C;  $^1\text{H NMR}$  (396 MHz,  $\text{CDCl}_3$ )  $\delta$  2.75–2.80 (m, 2H,  $\text{CH}_2$ ), 3.08–3.14 (m, 2H,  $\text{CH}_2$ ), 5.63–5.64 (m, 1H,  $\text{C}=\text{CH}$ ), 7.68 (d,  $J$  = 9 Hz, 2H,  $\text{ArH}$ ), 8.17 (d,  $J$  = 9 Hz, 2H,  $\text{ArH}$ );  $^{13}\text{C}\{^1\text{H}\}$  NMR (100 MHz,  $\text{CDCl}_3$ )  $\delta$  26.5, 26.6, 103.2, 123.8, 128.6, 140.6, 145.9, 151.9, 174.0; **IR (ATR)** 3361, 2955, 2923, 2852, 1821 ( $\text{C}=\text{O}$ ), 1666, 1587, 1504, 1469, 1437, 1414, 1335, 1289, 1224, 1180, 1085, 1009, 933, 863, 820, 801, 751, 705, 691, 654, 637, 626, 559  $\text{cm}^{-1}$ ; **HR-EI-MS** Calcd. for  $\text{C}_{11}\text{H}_9\text{NO}_4$   $[\text{M}]^+$ :  $m/z$  = 219.05316 Found 219.05319.

**(Z)- $\gamma$ -(4-Fluorobenzylidene)- $\gamma$ -butyrolactone (3h)**

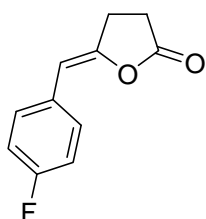

CAS registry No. none

White solids; **Mp** 78.0–79.0 °C; **<sup>1</sup>H NMR (396 MHz, CDCl<sub>3</sub>)** δ 2.70–2.74 (m, 2H, CH<sub>2</sub>), 3.00–3.06 (m, 2H, CH<sub>2</sub>), 5.51–5.53 (m, 1H, C=CH), 6.98–7.04 (m, 2H, ArH), 7.50–7.54 (m, 2H, ArH); **<sup>13</sup>C{<sup>1</sup>H} NMR (100 MHz, CDCl<sub>3</sub>)** δ 26.2, 26.9, 103.7, 115.3 (d, *J*<sub>C-F</sub> = 22 Hz), 129.8 (d, *J*<sub>C-F</sub> = 8 Hz), 130.0 (d, *J*<sub>C-F</sub> = 4 Hz), 147.7 (d, *J*<sub>C-F</sub> = 3 Hz), 161.4 (d, *J*<sub>C-F</sub> = 247 Hz), 174.8; **IR (ATR)** 3006, 2936, 2852, 1788 (C=O), 1687, 1601, 1504, 1443, 1416, 1352, 1297, 1226, 1173, 1159, 1101, 1091, 1013, 1002, 935, 855, 833, 818, 769, 706, 658, 626, 562 cm<sup>-1</sup>; **HR-EI-MS** Calcd. for C<sub>11</sub>H<sub>9</sub>FO<sub>2</sub> [M]<sup>+</sup>: *m/z* = 192.05866; Found 192.05866.

**(Z)-γ-(4-Chlorobenzylidene)-γ-butyrolactone (3i)**

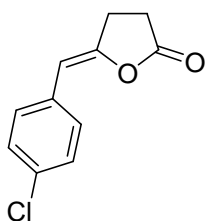

CAS registry No. none

White solids; **Mp** 81.5–82.5 °C; **<sup>1</sup>H NMR (396 MHz, CDCl<sub>3</sub>)** δ 2.70–2.75 (m, 2H, CH<sub>2</sub>), 3.01–3.07 (m, 2H, CH<sub>2</sub>), 5.50–5.52 (m, 1H, C=CH), 7.28 (d, *J* = 8 Hz, 2H, ArH), 7.48 (d, *J* = 8 Hz, 2H, ArH); **<sup>13</sup>C{<sup>1</sup>H} NMR (100 MHz, CDCl<sub>3</sub>)** δ 26.3, 26.8, 103.8, 128.6, 129.5, 132.2, 132.4, 148.6, 174.7; **IR (ATR)** 2956, 2925, 2851, 1793 (C=O), 1680, 1657, 1486, 1438, 1411, 1353, 1294, 1227, 1176, 1109, 1096, 1010, 944, 851, 833, 804, 714, 708, 679, 653, 625, 559 cm<sup>-1</sup>; **HR-EI-MS** Calcd. for C<sub>11</sub>H<sub>9</sub>ClO<sub>2</sub> [M]<sup>+</sup>: *m/z* = 208.02911; Found 208.02920.

**(Z)-γ-(2-Methylbenzylidene)-γ-butyrolactone (3j)**

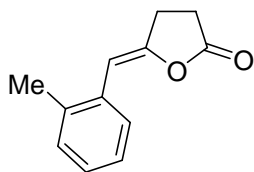

CAS registry No. none

White solids; **Mp** 90.0–91.0 °C; **<sup>1</sup>H NMR (396 MHz, CDCl<sub>3</sub>)** δ 2.32 (s, 3H, CH<sub>3</sub>), 2.70–2.75 (m, 2H, CH<sub>2</sub>), 3.04–3.10 (m, 2H, CH<sub>2</sub>), 5.68–5.70 (m, 1H, C=CH), 7.11–7.22 (m, 3H, ArH), 7.76 (d, *J* = 8 Hz, 2H, ArH); **<sup>13</sup>C{<sup>1</sup>H} NMR (100 MHz, CDCl<sub>3</sub>)** δ 20.2, 26.3, 27.1, 102.1, 126.0, 126.8, 129.0, 129.9, 132.3, 135.0, 148.2, 175.0; **IR (ATR)** 3069, 2956, 2930, 2862, 1793 (C=O), 1679, 1597, 1489, 1480, 1461, 1437, 1409, 1377, 1362, 1292, 1226, 1202, 1174, 1151, 1110, 1096, 1053, 1038, 1002, 945, 836, 769, 718, 650, 610, 568 cm<sup>-1</sup>; **HR-EI-MS** Calcd. for C<sub>12</sub>H<sub>12</sub>O<sub>2</sub> [M]<sup>+</sup>: *m/z* = 188.08373; Found 188.08370.

**(Z)- $\gamma$ -(1-Naphthalenylmethylene)- $\gamma$ -butyrolactone (3k)**

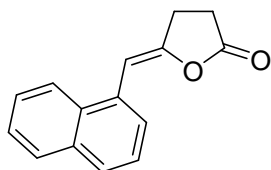

CAS registry No. none

White solids; **Mp** 91.0–92.0 °C;  **$^1\text{H}$  NMR (396 MHz,  $\text{CDCl}_3$ )**  $\delta$  2.76–2.81 (m, 2H,  $\text{CH}_2$ ), 3.16–3.21 (m, 2H,  $\text{CH}_2$ ), 6.24–6.25 (m, 1H,  $\text{C}=\text{CH}$ ), 7.46–7.54 (m, 3H,  $\text{ArH}$ ), 7.75 (d,  $J = 8$  Hz, 1H,  $\text{ArH}$ ), 7.85 (dd,  $J = 3, 7$  Hz, 1H,  $\text{ArH}$ ), 7.89 (d,  $J = 7$  Hz, 1H,  $\text{ArH}$ ), 8.03 (dd,  $J = 2, 8$  Hz, 1H,  $\text{ArH}$ );  **$^{13}\text{C}\{^1\text{H}\}$  NMR (100 MHz,  $\text{CDCl}_3$ )**  $\delta$  26.3, 27.2, 101.1, 123.6, 125.5, 125.6, 125.9, 127.1, 127.3, 128.7, 129.8, 131.0, 133.6, 149.4, 174.9; **IR (ATR)** 3048, 2929, 2868, 1789 (C=O), 1686, 1589, 1579, 1506, 1443, 1414, 1397, 1353, 1293, 1222, 1194, 1166, 1105, 1038, 1017, 959, 941, 910, 866, 832, 801, 775, 748, 740, 693, 650, 640, 612  $\text{cm}^{-1}$ ; **HR-EI-MS** Calcd. for  $\text{C}_{15}\text{H}_{12}\text{O}_2$   $[\text{M}]^+$ :  $m/z = 224.08373$ ; Found 224.08369.

**(Z)- $\gamma$ -(2-Thienylmethylene)- $\gamma$ -butyrolactone (3l)**

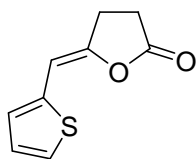

CAS registry No. none

White solids; **Mp** 96.5–97.5 °C;  **$^1\text{H}$  NMR (396 MHz,  $\text{CDCl}_3$ )**  $\delta$  2.73–2.78 (m, 2H,  $\text{CH}_2$ ), 3.00–3.05 (m, 2H,  $\text{CH}_2$ ), 5.84–5.86 (m, 1H,  $\text{C}=\text{CH}$ ), 6.99 (dd,  $J = 4, 5$  Hz, 1H,  $\text{ArH}$ ), 7.08 (d,  $J = 4$  Hz, 1H,  $\text{ArH}$ ), 7.24 (d,  $J = 5$  Hz, 1H,  $\text{ArH}$ );  **$^{13}\text{C}\{^1\text{H}\}$  NMR (100 MHz,  $\text{CDCl}_3$ )**  $\delta$  25.5, 27.3, 99.0, 125.1, 125.7, 126.8, 136.5, 146.6, 174.2; **IR (ATR)** 3093, 3069, 2961, 2928, 2852, 1786 (C=O), 1683, 1610, 1442, 1425, 1364, 1297, 1242, 1202, 1167, 1142, 1091, 1045, 1023, 939, 903, 846, 824, 819, 806, 780, 752, 698, 673, 653, 611, 588  $\text{cm}^{-1}$ ; **HR-EI-MS** Calcd. for  $\text{C}_9\text{H}_8\text{O}_2\text{S}$   $[\text{M}]^+$ :  $m/z = 180.02450$ ; Found 180.02446.

### Preparation of 2-Propargyloxyphenol (4)

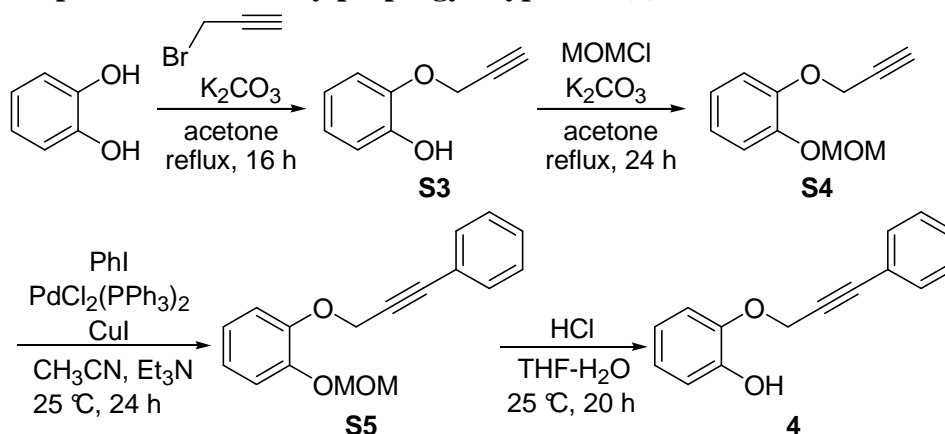

Scheme S2. Preparation of 2-phenylpropargyloxyphenol (4).

### 2-Propargyloxyphenol (S3)

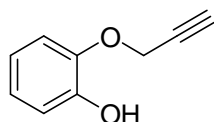

CAS registry No. 14817-38-0

Under a nitrogen atmosphere, a mixture of pyrocatechol (2.00 g, 18.2 mmol) and  $\text{K}_2\text{CO}_3$  (1.38 g, 9.99 mmol) in anhydrous acetone (90 mL) was stirred for 1 h at 25 °C. Propargyl bromide (2.16 g, 18.2 mmol) in dry acetone (1.5 mL) was slowly added at 25 °C during 1 h. The mixture was refluxed at 65 °C for 16 h. After being cooled to 25 °C, acetone was evaporated from the mixture. To the resulting residue was added water (50 mL). The suspension was extracted with  $\text{CHCl}_3$  (15 mL, 4 times). The combined organic layer was dried over  $\text{Na}_2\text{SO}_4$  and concentrated in vacuo. The resulting crude material was chromatographed on silica gel (eluent: 5-20%  $\text{AcOEt}/\text{n-hexane}$ ) to give 2-propargyloxyphenol (1.90 g, 12.8 mmol, 71%) as white solids.

$^1\text{H}$  NMR (396 MHz)  $\delta$  2.56 (t,  $J = 2.3$  Hz, 1H,  $\text{HC}\equiv\text{C}-$ ), 4.75 (d,  $J = 2.3$  Hz, 2H,  $\text{CH}\equiv\text{C}-\text{CH}_2-$ ), 5.64 (s, 1H,  $-\text{OH}$ ), 6.83–6.88 (m, 1H,  $\text{ArH}$ ), 6.90–7.00 (m, 3H,  $\text{ArH}$ );  $^{13}\text{C}\{^1\text{H}\}$  NMR (100 MHz)  $\delta$  56.9, 76.1, 78.1, 112.8, 115.2, 120.1, 122.6, 144.6, 146.0; MS (EI)  $m/z = 148$  ( $[\text{M}^+]$ ).

### 1-Methoxymethoxy-2-propargyloxybenzene (S4)

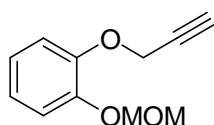

CAS registry No. none

Under a nitrogen atmosphere, to a mixture of 2-propargyloxyphenol (700 mg, 4.72 mmol)



and  $K_2CO_3$  (979 mg, 7.09 mmol) was added acetone (20 mL) at 25 °C. After being stirred at 25 °C for 1 h, methoxymethyl chloride (0.53 mL, 7.09 mmol) was slowly added to the resulting suspension at 25 °C. The reaction mixture stirred at 65 °C for 24 h. After being cooled to 25 °C, saturated  $NH_4Cl$  aqueous solution (15 mL) was added to the reaction mixture and then the resulting mixture was evaporated. The solution was extracted with MTBE (15 mL, 3 times). The combined organic layer was dried over  $Na_2SO_4$ , and concentrated in vacuo. The resulting crude mixture was chromatographed on silica gel (eluent: 5-10% AcOEt/n-hexane) to give 1-methoxymethoxy-2-propargyloxybenzene (720 mg, 3.75 mmol, 79%) as pale yellow oil.  $^1H$  NMR (396 MHz,  $CDCl_3$ )  $\delta$  2.51 (t,  $J = 2$  Hz, 1H, CCH), 3.52 (d,  $J = 0.9$  Hz, 3H,  $OCH_2OCH_3$ ), 4.77 (d,  $J = 2$  Hz, 2H,  $CH_2CCH$ ), 5.22 (d,  $J = 0.9$  Hz, 2H,  $OCH_2OCH_3$ ), 6.93–7.02 (m, 2H, ArH), 7.07 (dd,  $J = 2, 8$  Hz, 1H, ArH), 7.17 (dd,  $J = 2, 8$  Hz, 1H, ArH);  $^{13}C\{^1H\}$  NMR (100 MHz,  $CDCl_3$ )  $\delta$  56.2, 56.7, 75.7, 78.6, 95.5, 114.7, 117.0, 122.3, 122.4, 147.2, 147.6; IR (ATR) 3284 (CCH), 3071, 2993, 2956, 2934, 2827, 2120 (CC), 1594, 1499, 1456, 1374, 1324, 1302, 1242 (Ar-O- $CH_2$ ), 1216, 1188, 1153, 1119, 1078, 994, 922, 835, 745, 682, 671, 646, 639  $cm^{-1}$ ; HR-EI-MS Calcd. for  $C_{11}H_{12}O_3$   $[M]^+$ :  $m/z = 192.07864$ ; Found 192.07883.

### 1-Methoxymethoxy-2-phenylpropargyloxybenzene (S5)

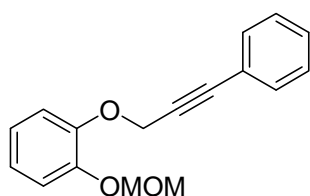

CAS registry No. none

Under a nitrogen atmosphere, to a suspension of  $PdCl_2(PPh_3)_2$  (64 mg, 0.091 mmol) and copper iodide (35 mg, 0.182 mmol) in triethylamine (2 mL), 1-methoxymethoxy-2-propargyloxybenzene (350 mg, 1.82 mmol) in  $CH_3CN$  (2 mL) and iodobenzene (0.22 mL, 2.00 mmol) were added at 25 °C. After being stirred at 25 °C for 24 h, saturated  $NH_4Cl$  aqueous solution (20 mL) was added to the reaction mixture and the resulting solution was extracted with AcOEt (20 mL, 3 times). The combined organic layer was dried over  $Na_2SO_4$ . After evaporation of the solvent, the resulting mixture was chromatographed on silica gel to give 1-methoxymethoxy-2-phenylpropargyloxybenzene (255.6 mg, 0.953 mmol, 52%) as pale yellow oil.

$^1\text{H}$  NMR (396 MHz,  $\text{CDCl}_3$ )  $\delta$  3.53 (s, 3H,  $\text{OCH}_3$ ), 4.98 (s, 2H,  $\text{CH}_2$ ), 5.24 (s, 2H,  $\text{OCH}_2\text{OCH}_3$ ), 6.93–7.02 (m, 2H, ArH), 7.13–7.20 (m, 2H, ArH), 7.28–7.32 (m, 3H, ArH), 7.39–7.43 (m, 2H, ArH);  $^{13}\text{C}\{^1\text{H}\}$  NMR (100 MHz,  $\text{CDCl}_3$ )  $\delta$  56.2, 56.6, 84.0, 87.3, 95.6, 114.9, 117.0, 122.1, 122.3, 122.4, 128.2, 128.6, 131.7, 147.2, 147.9; IR (ATR) 3063, 2993, 2953, 2930, 2898, 2848, 2825, 2237 (CC), 1592, 1498, 1490, 1455, 1441, 1403, 1371, 1322, 1300, 1240 (Ar-O- $\text{CH}_2$ ), 1214, 1187, 1152, 1118, 1076, 1051, 1030, 991, 920, 837, 817, 742, 690, 648, 607  $\text{cm}^{-1}$ ; HR-EI-MS Calcd. for  $\text{C}_{17}\text{H}_{16}\text{O}_3$   $[\text{M}]^+$ :  $m/z$  = 268.10994; Found 268.10991.

#### 2-[(3-phenylprop-2-yn-1-yl)oxy]phenol (**4**)

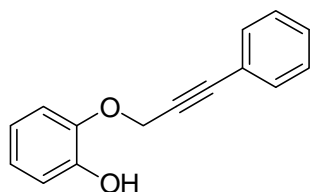

CAS registry No. 73222-90-9

HCl aqueous solution (4 mol/L, 6 mL) was added to a solution of 1-methoxymethoxy-2-phenylpropargyloxybenzene (225 mg, 0.839 mmol) in THF (6 mL) at 25 °C and the reaction mixture was stirred for 20 h at 25 °C. The resulting solution was extracted with *t*-butyl methyl ether (10 mL, 3 times). The combined organic layer was dried over  $\text{Na}_2\text{SO}_4$ . The organic layer was concentrated under reduced pressure to give 2-phenylpropargyloxyphenol (175.5 mg, 0.783 mmol, 93%) as brown oil.

$^1\text{H}$  NMR (396 MHz,  $\text{CDCl}_3$ )  $\delta$  4.97 (s, 2H,  $\text{CH}_2$ ), 5.70 (s, 1H, OH), 6.84–6.99 (m, 3H, ArH), 7.04–7.08 (m, 1H, ArH), 7.29–7.35 (m, 3H, ArH), 7.42–7.45 (m, 2H, ArH);  $^{13}\text{C}\{^1\text{H}\}$  NMR (100 MHz,  $\text{CDCl}_3$ )  $\delta$  57.9, 83.3, 87.7, 113.0, 115.1, 120.1, 121.9, 122.5, 128.3, 128.8, 131.8, 144.9, 146.1; MS (EI)  $m/z$  = 224 ( $[\text{M}]^+$ ).

#### Cyclization reaction of 2-phenylpropargyloxyphenol (**4**) (Scheme 1)

##### 2,3-Dihydro-2-(Z)-phenylmethylene-1,4-benzodioxin (**5**)

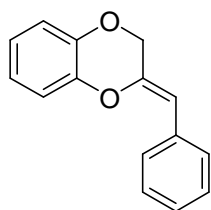

CAS registry No. 73249-12-4

2-Phenylpropargyloxyphenol (**4**, 13.5 mg, 0.060 mmol) was placed in a vial, to which was

added 0.5 mL aqueous suspension of **1a<sub>vsc1</sub>** (1.3 mg,  $1.2 \times 10^{-3}$  mmol) and Et<sub>3</sub>N (0.5  $\mu$ L,  $3.6 \times 10^{-3}$  mmol). The reaction mixture was agitated by shaking at 50 °C for 4 h, and then extracted with *t*-butyl methyl ether (1.5 mL, 4 times). The combined extract was dried over Na<sub>2</sub>SO<sub>4</sub> and concentrated in *vacuo*. The residue was chromatographed on silica gel (eluent: 5-15% AcOEt/*n*-hexane) to give **5** (5.6 mg, 0.025 mmol, 42%) as colorless oil.

**<sup>1</sup>H NMR (396 MHz, CDCl<sub>3</sub>)**  $\delta$  4.62 (s, 2H, CH<sub>2</sub>), 5.59 (s, 1H, C=CH), 6.93–6.99 (m, 3H, ArH), 7.12–7.15 (m, 1H, ArH), 7.21–7.25 (m, 1H, ArH), 7.34–7.38 (m, 2H, ArH), 7.68–7.71 (m, 2H, ArH); **<sup>13</sup>C{<sup>1</sup>H} NMR (100 MHz, CDCl<sub>3</sub>)**  $\delta$  66.1, 107.0, 116.8, 117.4, 122.3, 122.6, 126.9, 128.4, 128.9, 134.2, 142.5, 143.4, 144.1; **MS (EI)**  $m/z$  = 224 ([M<sup>+</sup>]).

<sup>1</sup>H and <sup>13</sup>C NMR spectra  
Methyl-4-pentynoate (S1)

HCCCH<sub>2</sub>CH<sub>2</sub>COOMe-1H

C:\Documents and Settings\ALPHA\I\X\N/g/b/A/UozumiG\Hanaoka\HCCCH<sub>2</sub>CH<sub>2</sub>COOMe-1H.als

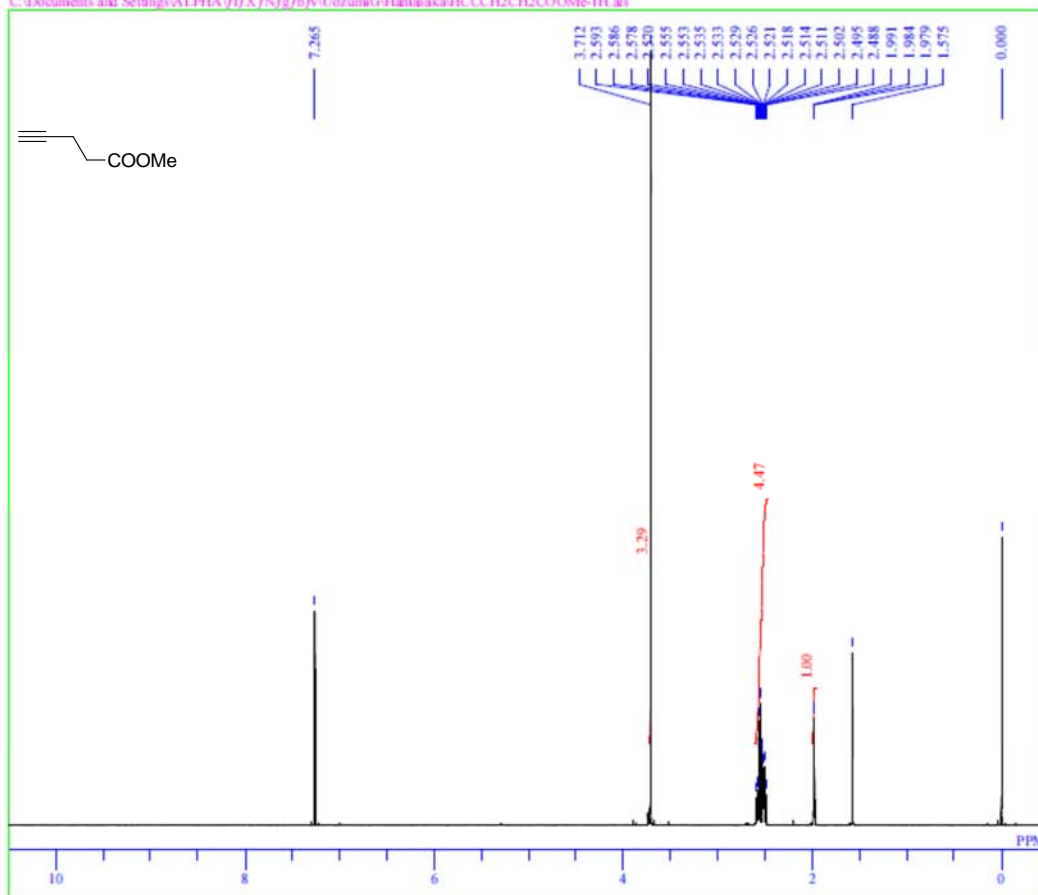

DFILE HCCCH<sub>2</sub>CH<sub>2</sub>COOMe-1H.als  
COMNT HCCCH<sub>2</sub>CH<sub>2</sub>COOMe-1H  
DATIM 2013-07-04 22:36:31  
OBNUC 1H  
EXMOD proton.jsp  
OBFREQ 395.88 MHz  
OBSET 6.28 KHz  
OBFIN 0.87 Hz  
POINT 16384  
FREQU 7422.80 Hz  
SCANS 8  
ACQTM 2.2073 sec  
PD 5.0000 sec  
PWI 3.12 usec  
IRNUC 1H  
CTEMP 18.9 c  
SLVNT CDCL<sub>3</sub>  
EXREF 0.00 ppm  
BF 0.00 Hz  
RGAIN 42

HCCCH<sub>2</sub>CH<sub>2</sub>COOMe-13C

C:\Documents and Settings\ALPHA\I\X\N/g/b/A/UozumiG\Hanaoka\HCCCH<sub>2</sub>CH<sub>2</sub>COOMe-13C.als

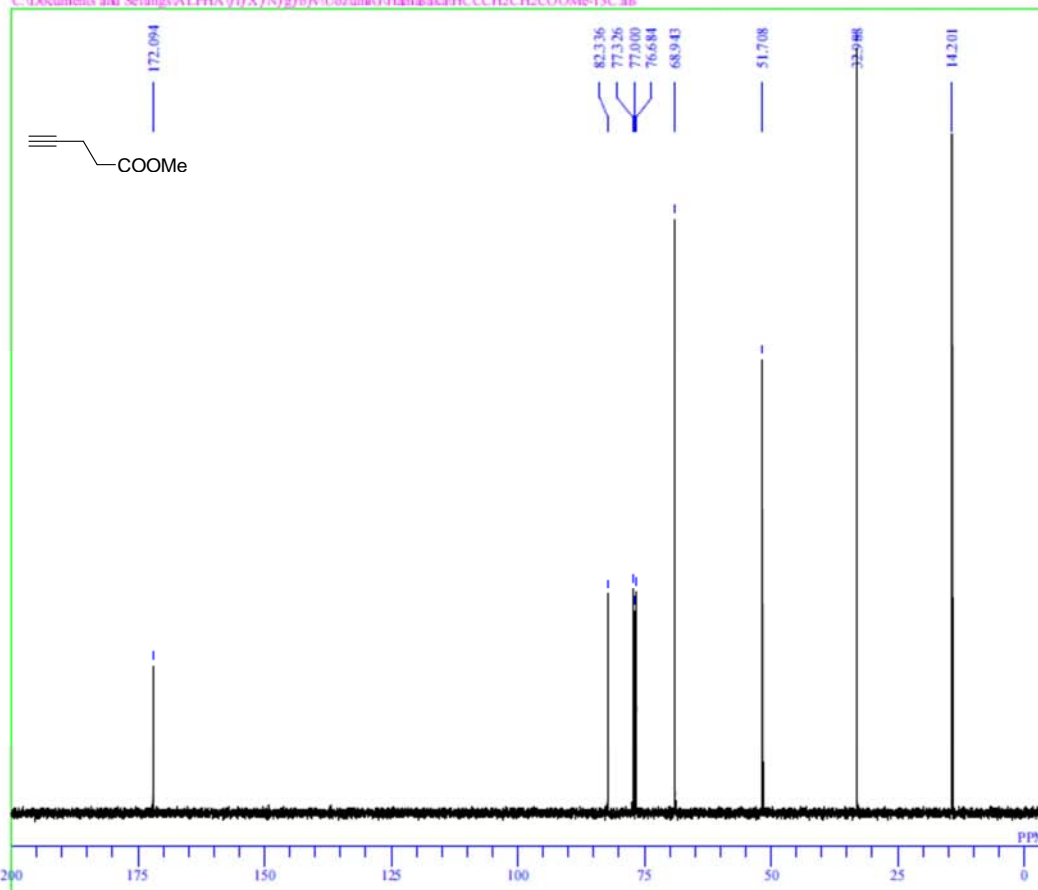

DFILE HCCCH<sub>2</sub>CH<sub>2</sub>COOMe-13C.als  
COMNT HCCCH<sub>2</sub>CH<sub>2</sub>COOMe-13C  
DATIM 2013-07-04 22:23:09  
OBNUC 13C  
EXMOD carbon.jsp  
OBFREQ 99.55 MHz  
OBSET 5.13 KHz  
OBFIN 0.98 Hz  
POINT 32767  
FREQU 31250.00 Hz  
SCANS 112  
ACQTM 1.0486 sec  
PD 2.0000 sec  
PWI 3.42 usec  
IRNUC 1H  
CTEMP 19.0 c  
SLVNT CDCL<sub>3</sub>  
EXREF 77.00 ppm  
BF 0.50 Hz  
RGAIN 60

Methyl 5-(4-trifluoromethylphenyl)-4-pentynoate (S2a)

GH-1298-1H

C:\Documents and Settings\ALPHA\ffx\N/g/b/A/Uozumi/G/Hamaoka/GH-1298-1H.als

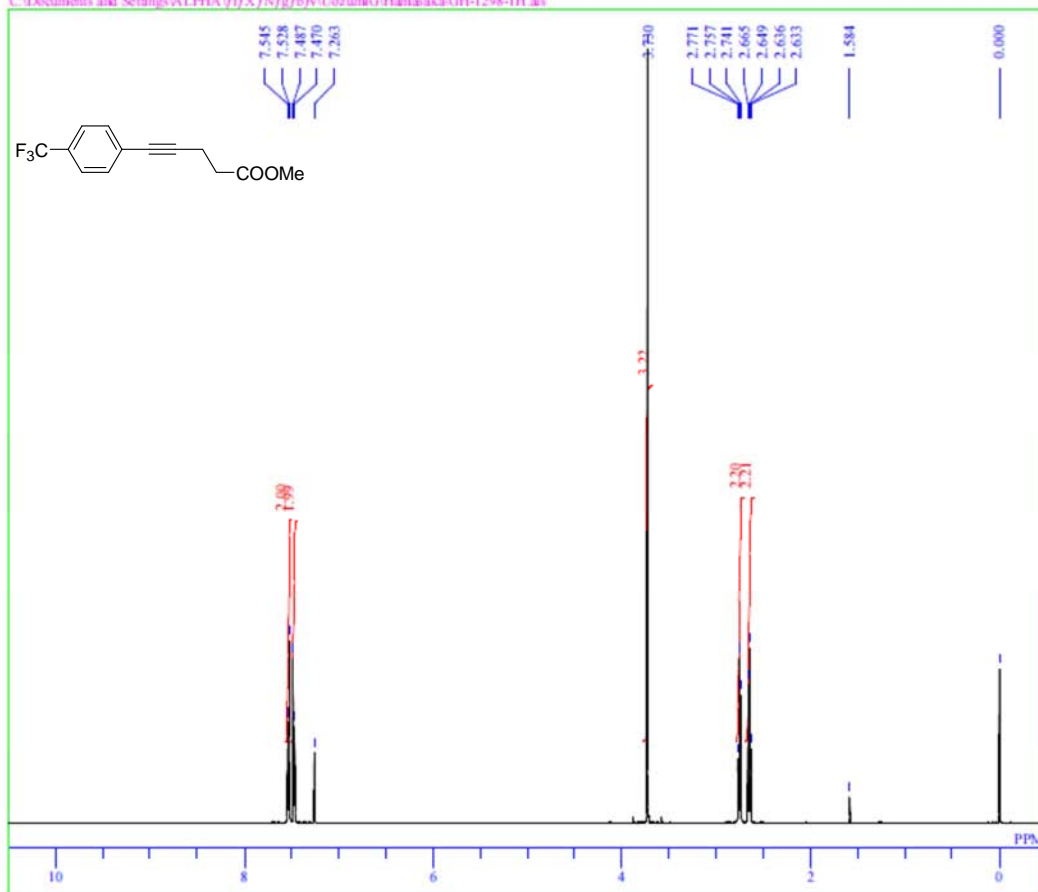

DFILE GH-1298-1H.als  
 COMNT GH-1298-1H  
 DATIM Mon Oct 01 19:29:48 2012  
 OBNUC 1H  
 EXMOD SINGL  
 OBFREQ 500.00 MHz  
 OBSET 0.00 KHz  
 OBFIN 162410.00 Hz  
 POINT 16384  
 FREQU 10000.00 Hz  
 SCANS 16  
 ACQTM 1.6384 sec  
 PD 2.0000 sec  
 PWI 6.40 usec  
 IRNUC 1H  
 CTEMP 22.5 c  
 SLVNT CDCL3  
 EXREF 0.00 ppm  
 BF 0.00 Hz  
 RGAIN 17

GH-1298-13C

C:\Documents and Settings\ALPHA\ffx\N/g/b/A/Uozumi/G/Hamaoka/GH-1298-13C.als

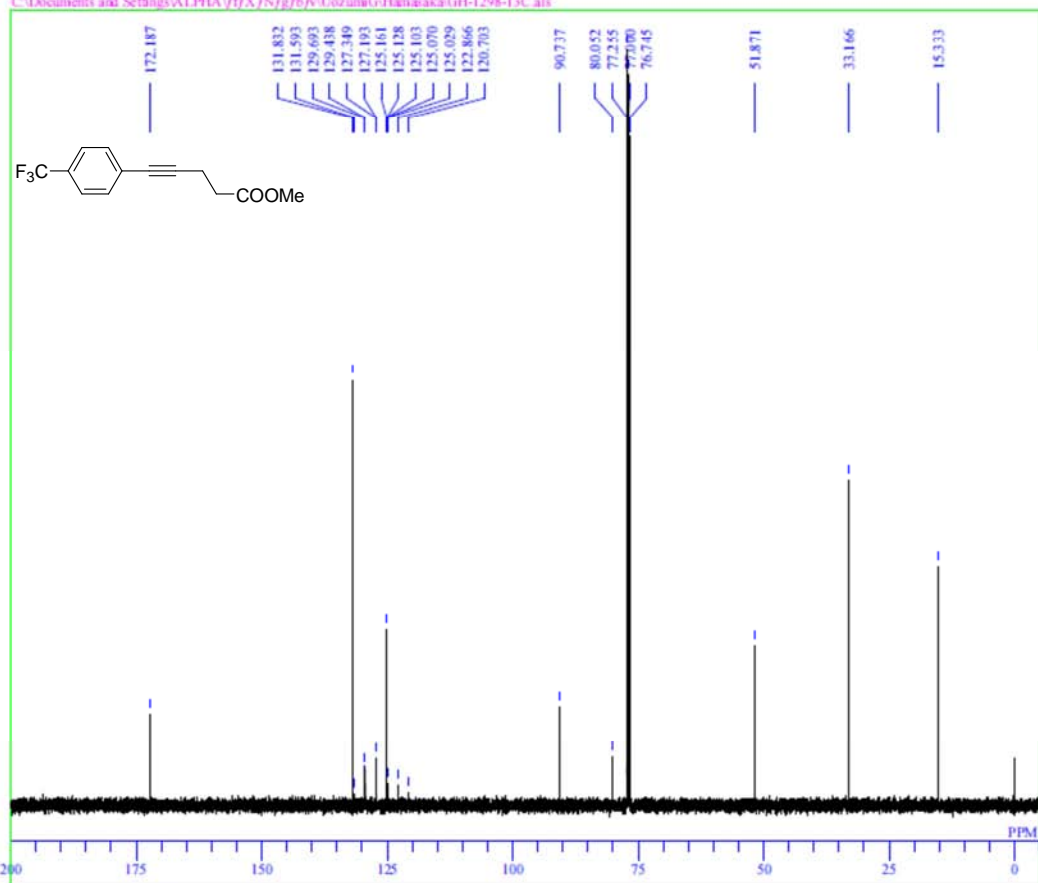

DFILE GH-1298-13C.als  
 COMNT GH-1298-13C  
 DATIM Mon Oct 01 20:38:05 2012  
 OBNUC 13C  
 EXMOD SINGL  
 OBFREQ 125.65 MHz  
 OBSET 0.00 KHz  
 OBFIN 127958.00 Hz  
 POINT 32768  
 FREQU 33898.30 Hz  
 SCANS 2000  
 ACQTM 0.9667 sec  
 PD 1.0000 sec  
 PWI 5.75 usec  
 IRNUC 13C  
 CTEMP 23.9 c  
 SLVNT CDCL3  
 EXREF 77.00 ppm  
 BF 0.00 Hz  
 RGAIN 26

Methyl 5-phenyl-4-pentynoate (S2b)

GH-1463-1H

C:\Documents and Settings\ALPHA\ff\X\N\g\b\Uozumi\G\Hamazaki\GH-1463-1H.als

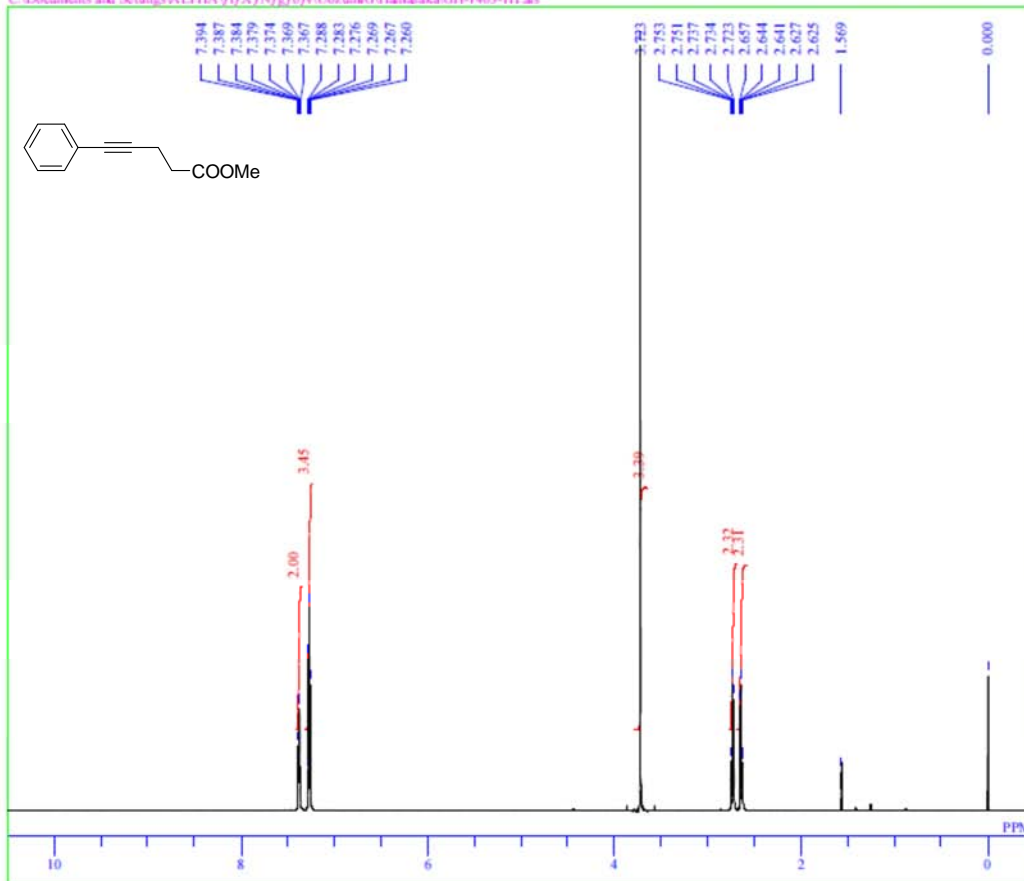

DFILE GH-1463-1H.als  
 COMNT GH-1463-1H  
 DATIM Fri Feb 15 21:39:57 2013  
 OBNUC 1H  
 EXMOD SINGL  
 OBFREQ 500.00 MHz  
 OBSET 0.00 KHz  
 OBFIN 162410.00 Hz  
 POINT 16384  
 FREQU 10000.00 Hz  
 SCANS 16  
 ACQTM 1.6384 sec  
 PD 2.0000 sec  
 PWI 6.40 usec  
 IRNUC 1H  
 CTEMP 21.6 c  
 SLVNT CDCL3  
 EXREF 0.00 ppm  
 BF 0.00 Hz  
 RGAIN 20

PhCCCH2CH2COOMe-13C

C:\Documents and Settings\ALPHA\ff\X\N\g\b\Uozumi\G\Hamazaki\PhCCCH2CH2COOMe-13C.als

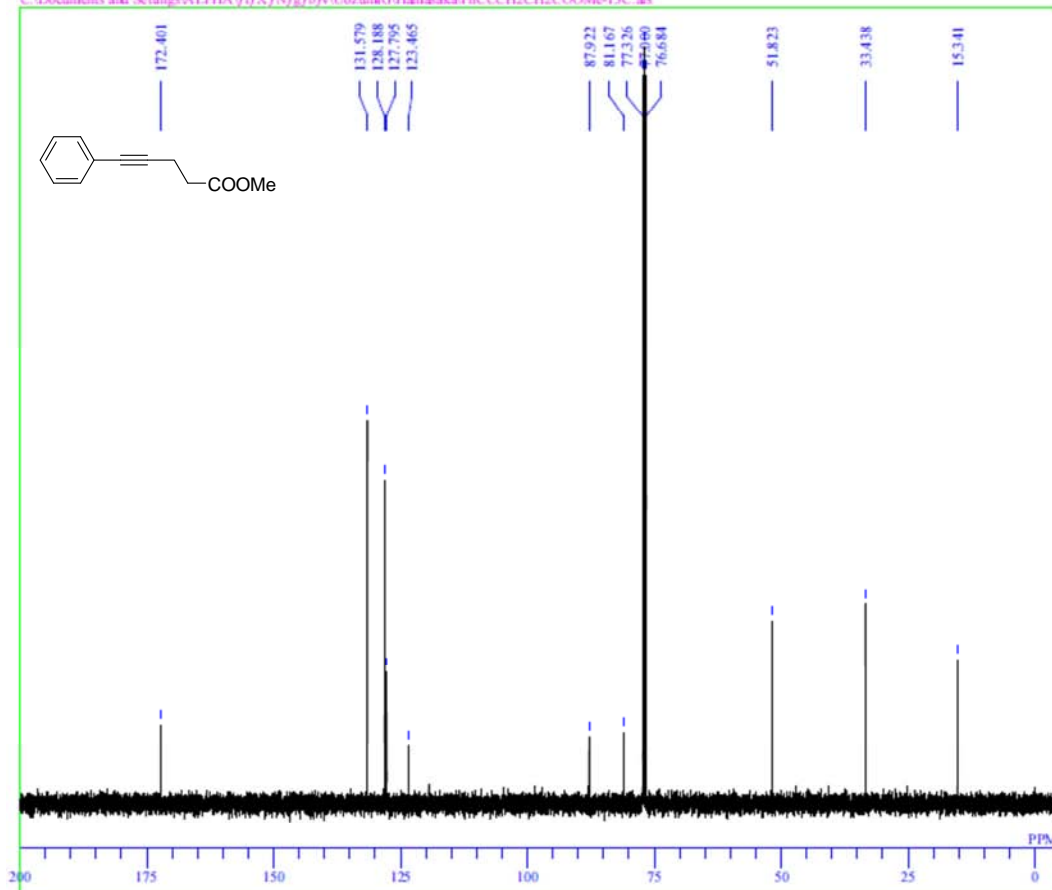

DFILE PhCCCH2CH2COOMe-13C.als  
 COMNT PhCCCH2CH2COOMe-13C  
 DATIM 2013-07-05 19:15:02  
 OBNUC 13C  
 EXMOD carbon.jsp  
 OBFREQ 99.55 MHz  
 OBSET 5.13 KHz  
 OBFIN 0.98 Hz  
 POINT 32767  
 FREQU 31250.00 Hz  
 SCANS 239  
 ACQTM 1.0486 sec  
 PD 2.0000 sec  
 PWI 3.42 usec  
 IRNUC 13C  
 CTEMP 21.3 c  
 SLVNT CDCL3  
 EXREF 77.00 ppm  
 BF 0.50 Hz  
 RGAIN 60

Methyl 5-(4-methylphenyl)-4-pentynoate (S2c)

GH-1289-3-1H

C:\Documents and Settings\ALPHA\ff\X\N\g\b\A\Uozumi\GHanasaki\GH-1289-3-1H.als

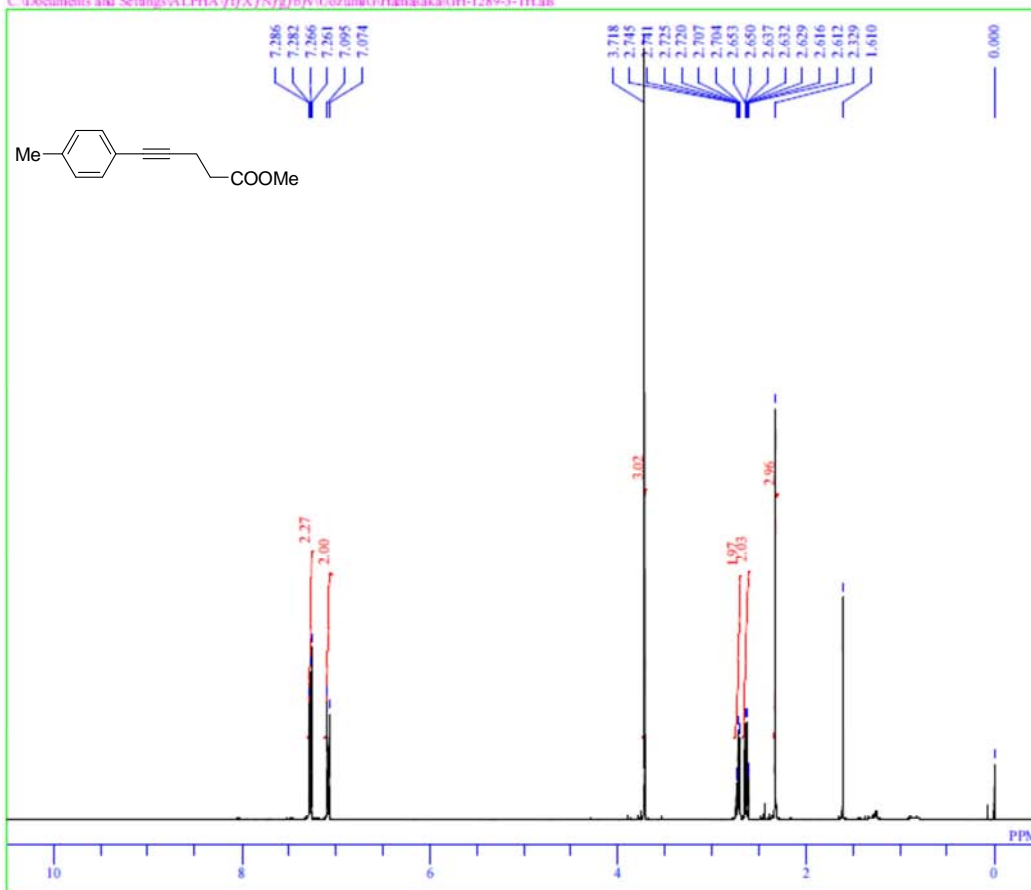

DFILE GH-1289-3-1H.als  
 COMNT GH-1289-3-1H  
 DATIM 2013-06-18 21:49:22  
 OBNUC 1H  
 EXMOD proton.jsp  
 OBFREQ 395.88 MHz  
 OBSSET 6.28 KHz  
 OBFIN 0.87 Hz  
 POINT 16384  
 FREQU 7422.80 Hz  
 SCANS 8  
 ACQTM 2.2073 sec  
 PD 5.0000 sec  
 PW1 3.12 usec  
 BRNUC 1H  
 CTEMP 19.1 c  
 SLVNT CDCL3  
 EXREF 0.00 ppm  
 BF 0.00 Hz  
 RGAIN 34

GH-1289-3-13C

C:\Documents and Settings\ALPHA\ff\X\N\g\b\A\Uozumi\GHanasaki\GH-1289-3-13C.als

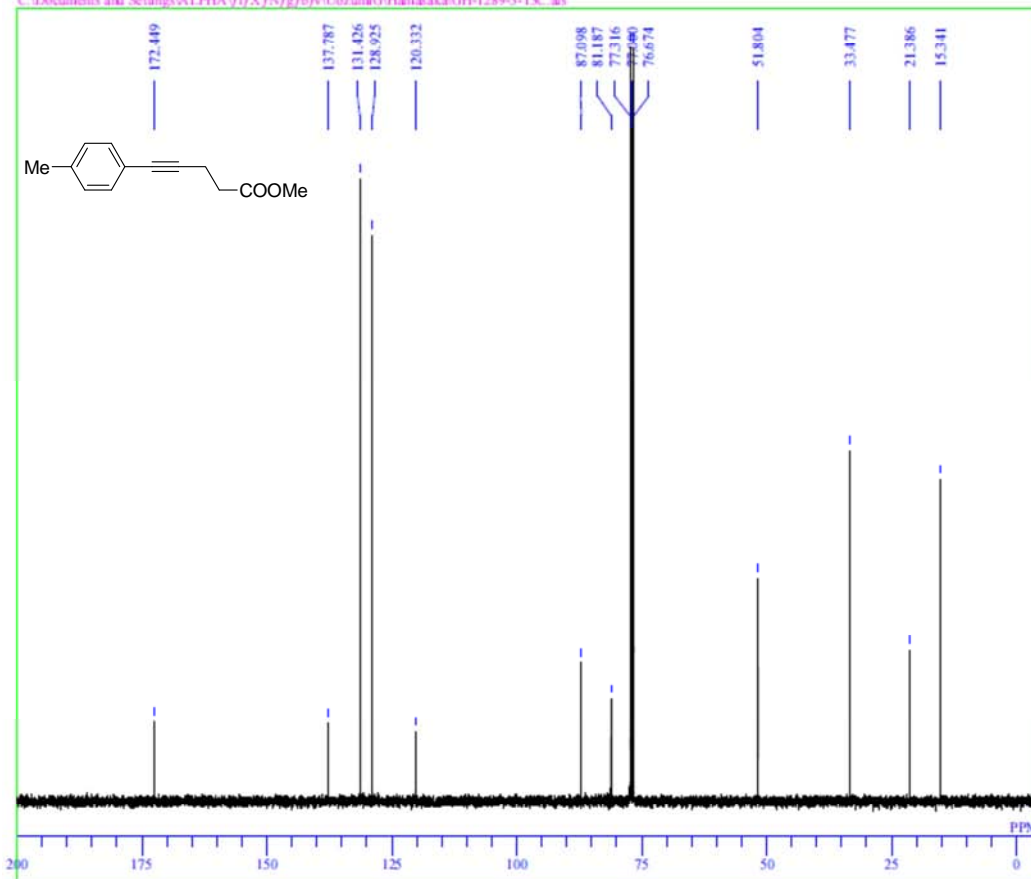

DFILE GH-1289-3-13C.als  
 COMNT GH-1289-3-13C  
 DATIM 2013-06-18 21:53:45  
 OBNUC 13C  
 EXMOD carbon.jsp  
 OBFREQ 99.55 MHz  
 OBSSET 5.13 KHz  
 OBFIN 0.98 Hz  
 POINT 32767  
 FREQU 31250.00 Hz  
 SCANS 864  
 ACQTM 1.0486 sec  
 PD 2.0000 sec  
 PW1 3.42 usec  
 BRNUC 13C  
 CTEMP 19.1 c  
 SLVNT CDCL3  
 EXREF 77.00 ppm  
 BF 0.40 Hz  
 RGAIN 60

Methyl 5-(4-methoxyphenyl)-4-pentynoate (**S2d**)

GH-1290-1H

C:\Documents and Settings\ALPHA\p\X\N\p\6\Uozumi\G\Hamaoka\GH-1290-1H.als

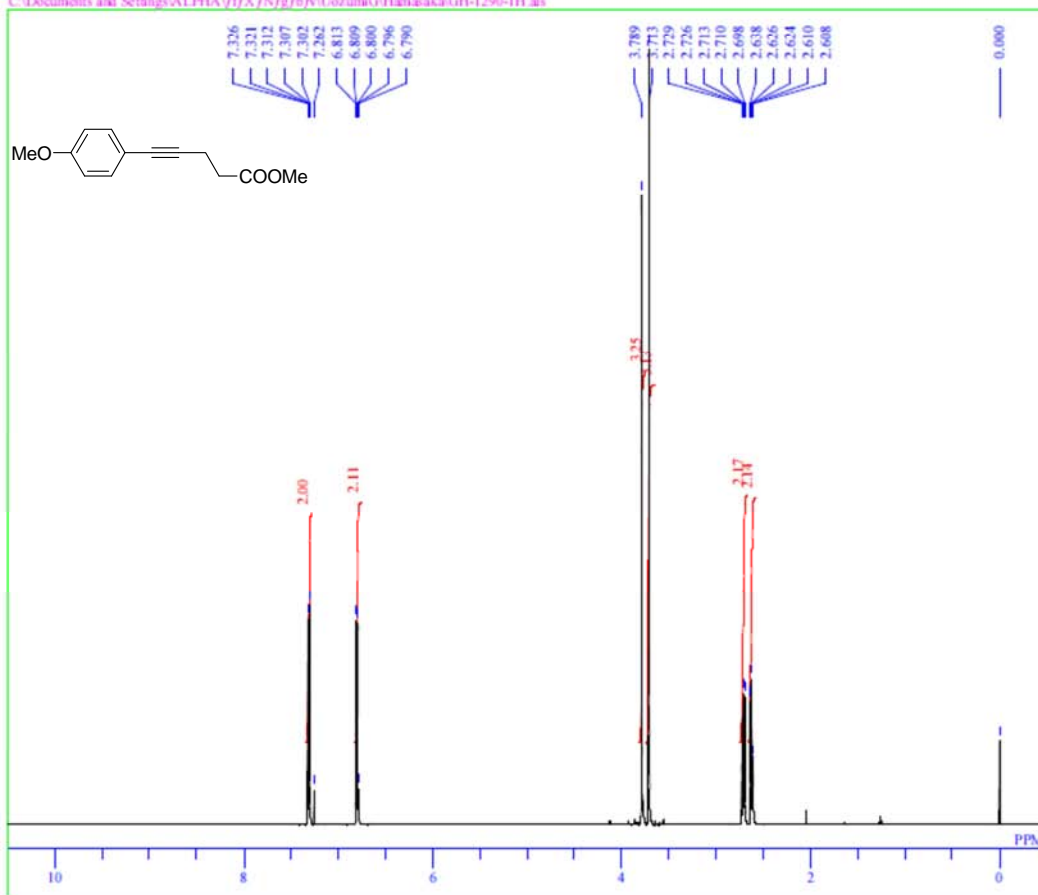

DFILE GH-1290-1H.als  
 COMNT GH-1290-1H  
 DATIM Thu Sep 27 19:23:00 2012  
 OBNUC 1H  
 EXMOD SINGL  
 OBFREQ 500.00 MHz  
 OBSET 0.00 KHz  
 OBFIN 162410.00 Hz  
 POINT 16384  
 FREQU 10000.00 Hz  
 SCANS 16  
 ACQTM 1.6384 sec  
 PD 2.0000 sec  
 PWI 6.40 usec  
 IRNUC 1H  
 CTEMP 22.0 c  
 SLVNT CDCL3  
 EXREF 0.00 ppm  
 BF 0.00 Hz  
 RGAIN 14

GH-1290-13C

C:\Documents and Settings\ALPHA\p\X\N\p\6\Uozumi\G\Hamaoka\GH-1290-13C.als

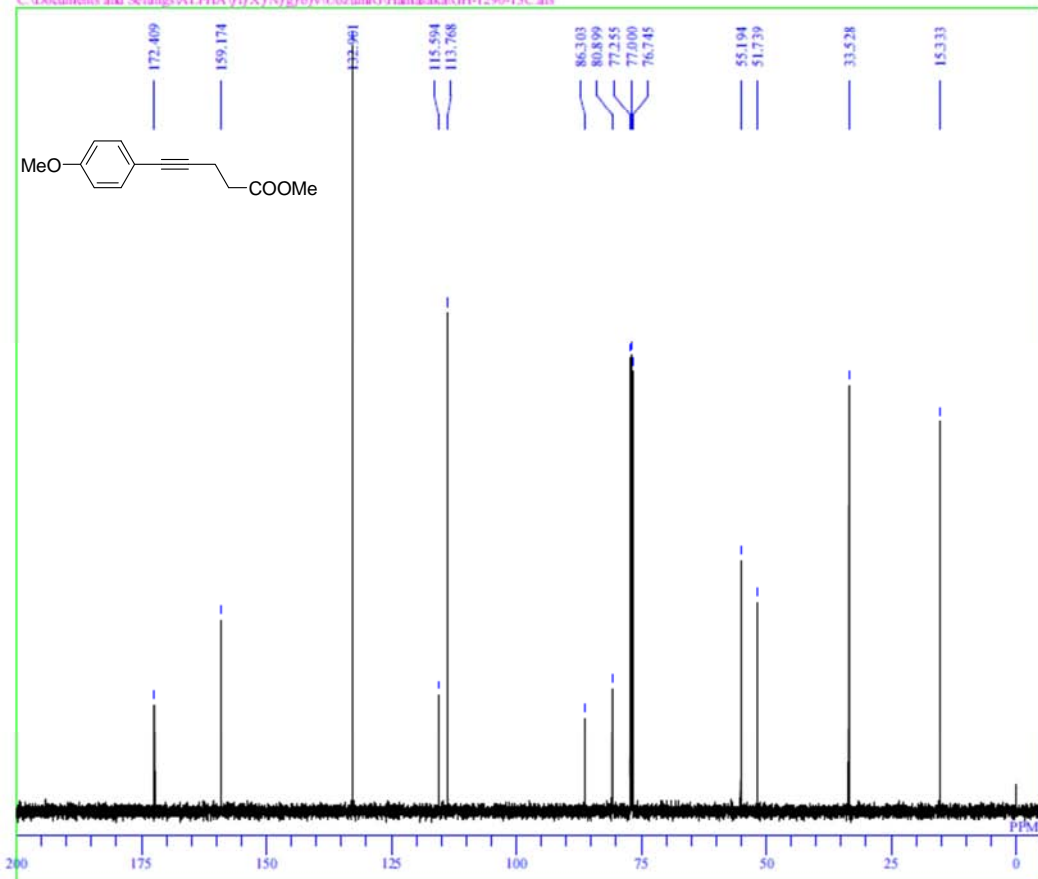

DFILE GH-1290-13C.als  
 COMNT GH-1290-13C  
 DATIM Thu Sep 27 19:42:14 2012  
 OBNUC 13C  
 EXMOD SINGL  
 OBFREQ 125.65 MHz  
 OBSET 0.00 KHz  
 OBFIN 127958.00 Hz  
 POINT 32768  
 FREQU 33898.30 Hz  
 SCANS 531  
 ACQTM 0.9667 sec  
 PD 1.0000 sec  
 PWI 5.75 usec  
 IRNUC 13C  
 CTEMP 23.5 c  
 SLVNT CDCL3  
 EXREF 77.00 ppm  
 BF 0.40 Hz  
 RGAIN 26



Methyl 5-(4-*tert*-butylphenyl)-4-pentynoate (**S2e**)

GH-1523-1H

C:\Documents and Settings\ALPHA\I\X\N\g\h\Uozumi\G\Hamasaki\GH-1523-1H.als

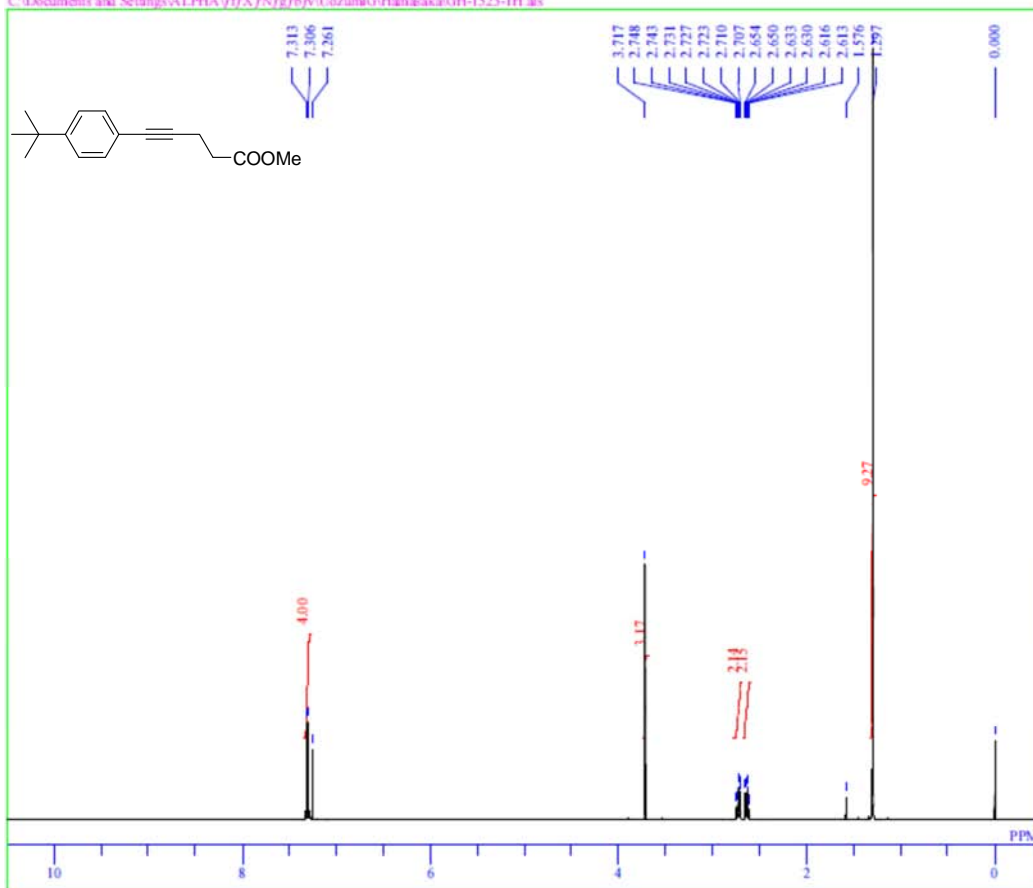

DFILE GH-1523-1H.als  
 COMNT GH-1523-1H  
 DATIM 2013-05-01 21:24:31  
 IRNUC 1H  
 EXMOD proton.jsp  
 OBFREQ 395.88 MHz  
 OBSET 6.28 KHz  
 OBFIN 0.87 Hz  
 POINT 13107  
 FREQU 5938.24 Hz  
 SCANS 8  
 ACQTM 2.2073 sec  
 PD 5.0000 sec  
 PW1 3.12 usec  
 IRNUC 1H  
 CTEMP 19.1 c  
 SLVNT CDCL3  
 EXREF 0.00 ppm  
 BF 0.00 Hz  
 RGAIN 36

GH-1523-13C

C:\Documents and Settings\ALPHA\I\X\N\g\h\Uozumi\G\Hamasaki\GH-1523-13C.als

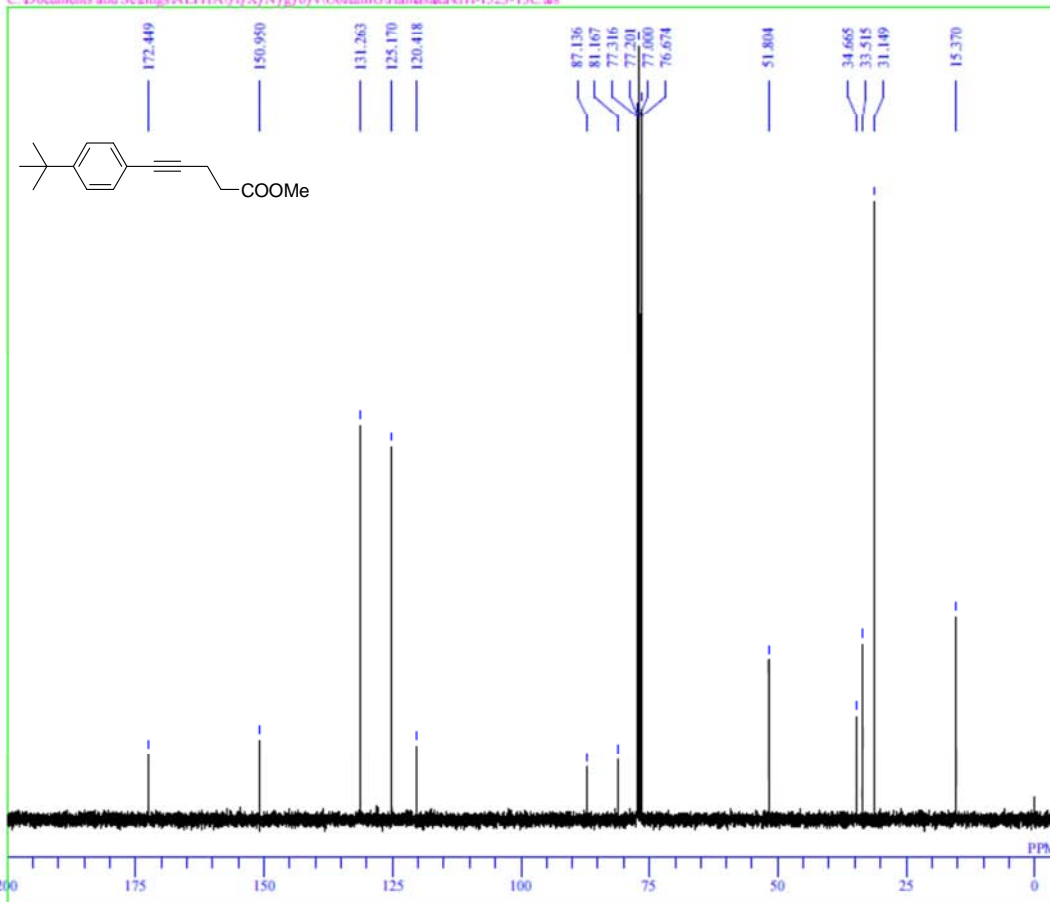

DFILE GH-1523-13C.als  
 COMNT GH-1523-13C  
 DATIM 2013-05-01 21:27:54  
 IRNUC 13C  
 EXMOD carbon.jsp  
 OBFREQ 99.55 MHz  
 OBSET 5.13 KHz  
 OBFIN 0.98 Hz  
 POINT 32767  
 FREQU 31250.00 Hz  
 SCANS 544  
 ACQTM 1.0486 sec  
 PD 2.0000 sec  
 PW1 3.42 usec  
 IRNUC 1H  
 CTEMP 18.6 c  
 SLVNT CDCL3  
 EXREF 77.00 ppm  
 BF 0.50 Hz  
 RGAIN 60

Methyl 5-(4-phenylphenyl)-4-pentynoate (**S2f**)

GH-1338-1H

C:\Documents and Settings\ALPHA\ffX\N\g\b\A\Uozumi\GH\Hanaoka\GH-1338-1H.als

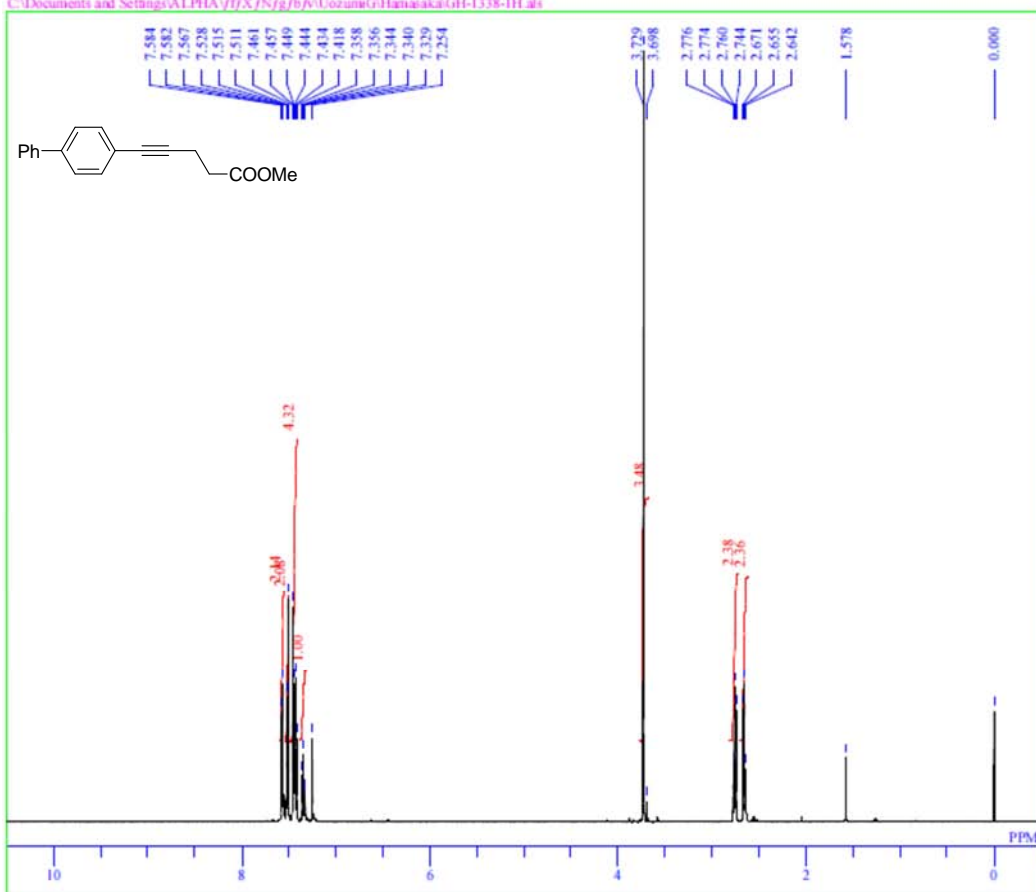

DFILE GH-1338-1H.als  
 COMNT GH-1338-1H  
 DATIM Thu Nov 22 21:33:51 2012  
 OBNUC 1H  
 EXMOD SINGL  
 OBFREQ 500.00 MHz  
 OBSSET 0.00 KHz  
 OBFIN 162410.00 Hz  
 POINT 16384  
 FREQU 10000.00 Hz  
 SCANS 16  
 ACQTM 1.6384 sec  
 PD 2.0000 sec  
 PWI 6.40 usec  
 IRNUC 1H  
 CTEMP 21.5 c  
 SLVNT CDCL3  
 EXREF 0.00 ppm  
 BF 0.00 Hz  
 RGAIN 17

GH-1338-13C

C:\Documents and Settings\ALPHA\ffX\N\g\b\A\Uozumi\GH\Hanaoka\GH-1338-13C.als

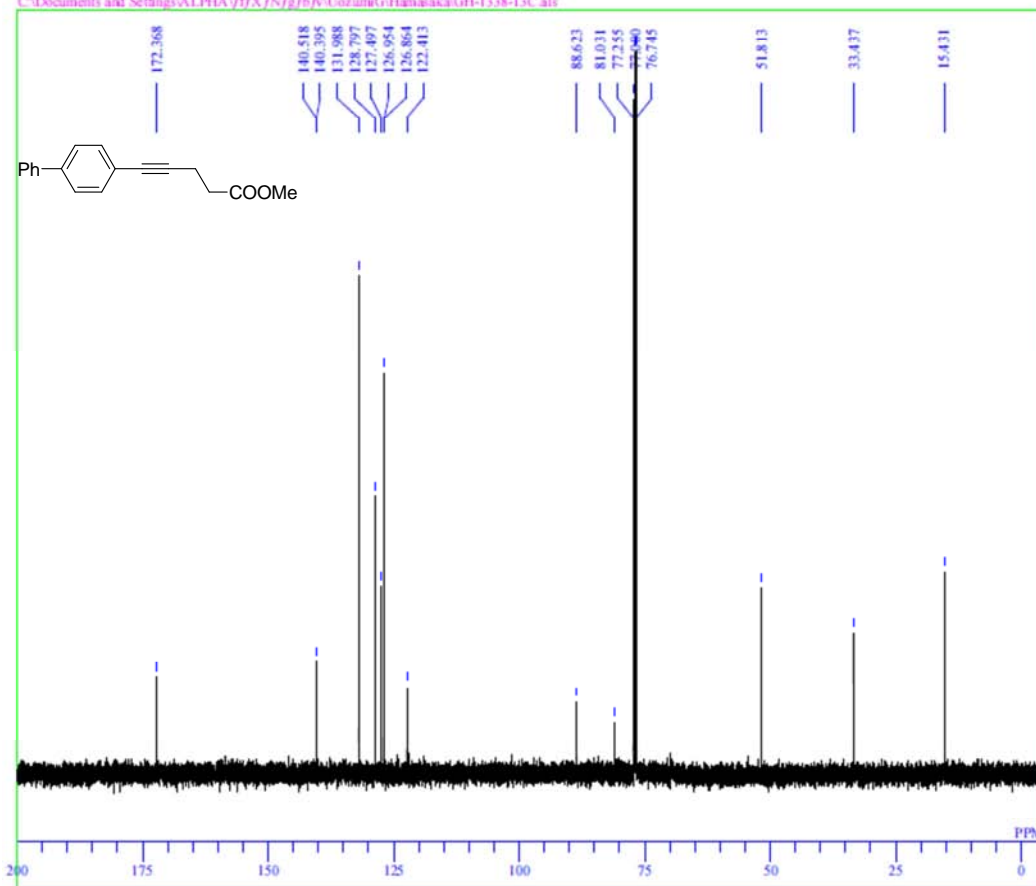

DFILE GH-1338-13C.als  
 COMNT GH-1338-13C  
 DATIM Tue Nov 27 10:32:00 2012  
 OBNUC 13C  
 EXMOD SINGL  
 OBFREQ 125.65 MHz  
 OBSSET 0.00 KHz  
 OBFIN 127958.00 Hz  
 POINT 32768  
 FREQU 33898.30 Hz  
 SCANS 463  
 ACQTM 0.9667 sec  
 PD 1.0000 sec  
 PWI 5.75 usec  
 IRNUC 1H  
 CTEMP 23.8 c  
 SLVNT CDCL3  
 EXREF 77.00 ppm  
 BF 0.20 Hz  
 RGAIN 26

Methyl 5-(4-nitrophenyl)-4-pentynoate (**S2g**)

GH-1299-1H

C:\Documents and Settings\ALPHA\ff\X\N/g/b/A/UozumiG\Hanawaka\GH-1299-1H.xls

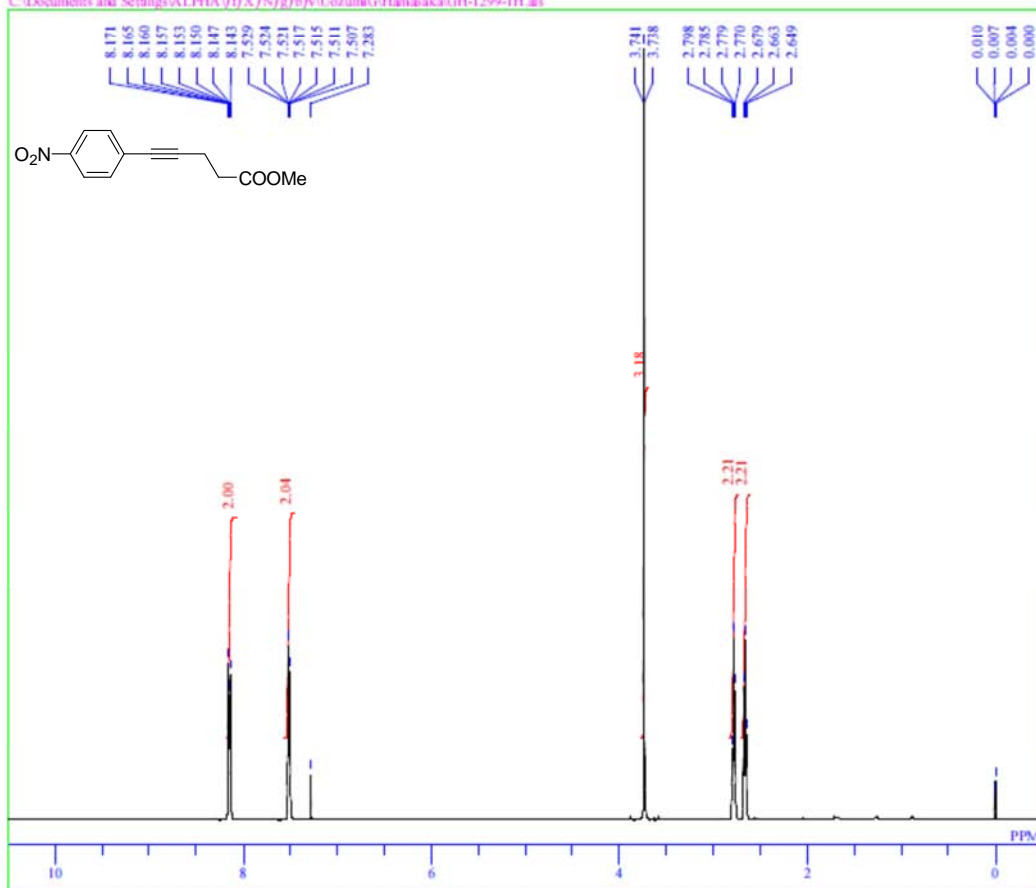

DFILE GH-1299-1H.xls  
 COMNT GH-1299-1H  
 DATIM Mon Oct 01 20:55:22 2012  
 OBNUC 1H  
 EXMOD SINGL  
 OBFREQ 500.00 MHz  
 OBSET 0.00 KHz  
 OBFIN 162410.00 Hz  
 POINT 16384  
 FREQU 10000.00 Hz  
 SCANS 16  
 ACQTM 1.6384 sec  
 PD 2.0000 sec  
 PWI 6.40 usec  
 IRNUC 1H  
 CTEMP 22.8 c  
 SLVNT CDCL3  
 EXREF 0.00 ppm  
 BF 0.00 Hz  
 RGAIN 15

GH-1299-13C

C:\Documents and Settings\ALPHA\ff\X\N/g/b/A/UozumiG\Hanawaka\GH-1299-13C.xls

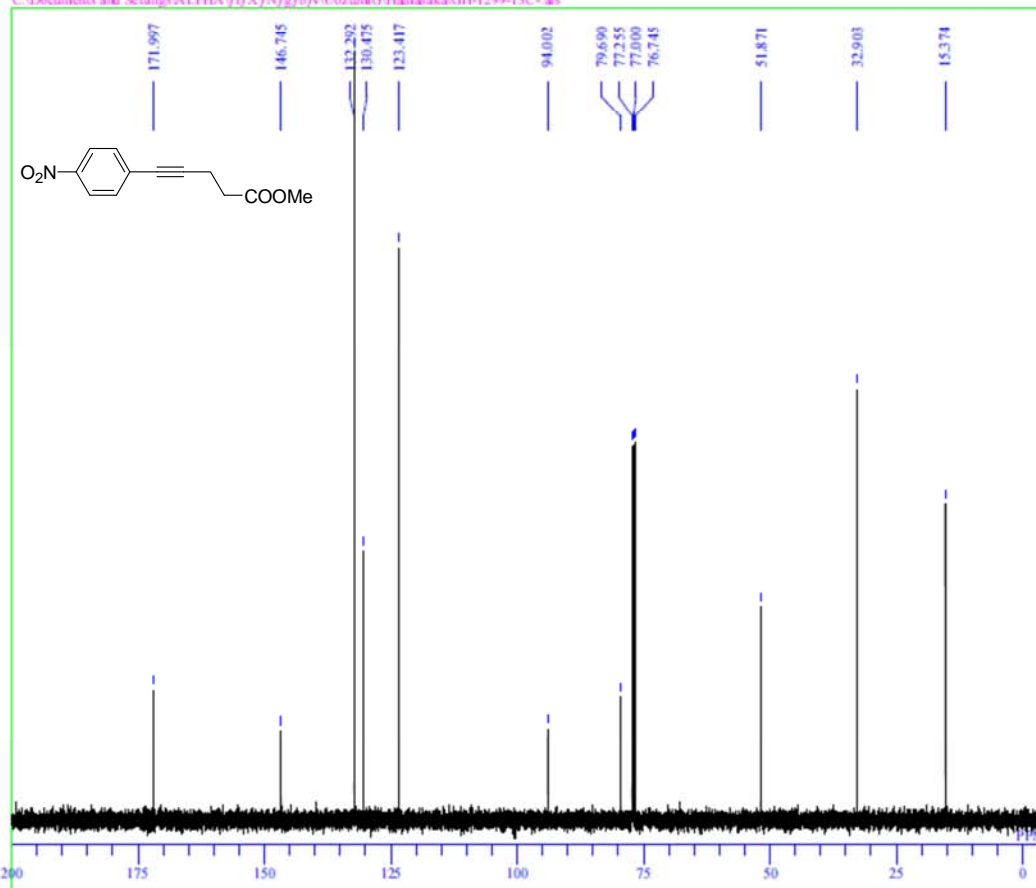

DFILE GH-1299-13C-.xls  
 COMNT GH-1299-13C  
 DATIM Mon Oct 01 21:16:13 2012  
 OBNUC 13C  
 EXMOD SINGL  
 OBFREQ 125.65 MHz  
 OBSET 0.00 KHz  
 OBFIN 127958.00 Hz  
 POINT 32768  
 FREQU 33898.30 Hz  
 SCANS 58  
 ACQTM 0.9667 sec  
 PD 1.0000 sec  
 PWI 5.75 usec  
 IRNUC 1H  
 CTEMP 23.7 c  
 SLVNT CDCL3  
 EXREF 77.00 ppm  
 BF 0.00 Hz  
 RGAIN 27

Methyl 5-(4-fluorophenyl)-4-pentynoate (**S2h**)

GH-1382-1H

C:\Documents and Settings\ALPHA\ffX\N/g/b/A/UozumiGHanawaka\GH-1382-1H.als

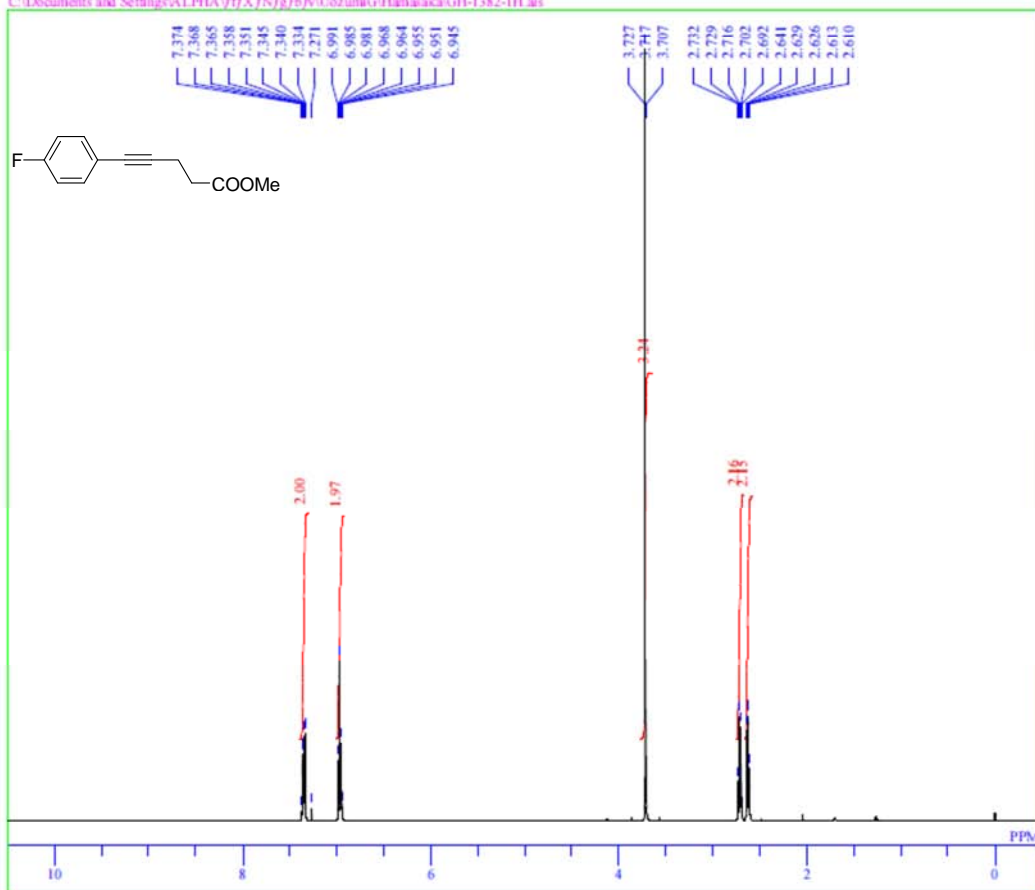

DFILE GH-1382-1H.als  
 COMNT GH-1382-1H  
 DATIM Thu Dec 20 10:54:28 2012  
 OBNUC 1H  
 EXMOD SINGL  
 OBFREQ 500.00 MHz  
 OBSSET 0.00 KHz  
 OBFIN 162410.00 Hz  
 POINT 16384  
 FREQU 10000.00 Hz  
 SCANS 16  
 ACQTM 1.6384 sec  
 PD 2.0000 sec  
 PW1 6.40 usec  
 IRNUC 1H  
 CTEMP 22.1 c  
 SLVNT CDCL3  
 EXREF 0.00 ppm  
 BF 0.00 Hz  
 RGAIN 14

GH-1382-13C

C:\Documents and Settings\ALPHA\ffX\N/g/b/A/UozumiGHanawaka\GH-1382-13C.als

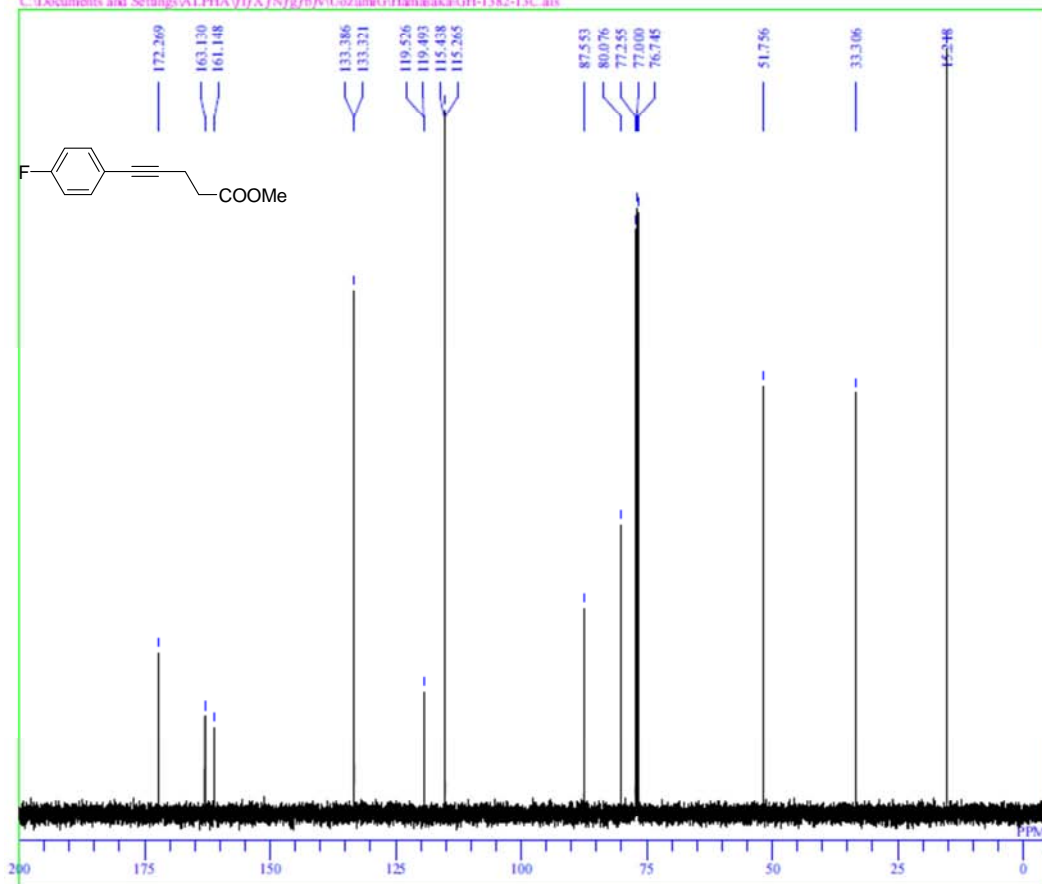

DFILE GH-1382-13C.als  
 COMNT GH-1382-13C  
 DATIM Thu Dec 20 11:08:18 2012  
 OBNUC 13C  
 EXMOD SINGL  
 OBFREQ 125.65 MHz  
 OBSSET 0.00 KHz  
 OBFIN 127958.00 Hz  
 POINT 32768  
 FREQU 33898.30 Hz  
 SCANS 350  
 ACQTM 0.9667 sec  
 PD 1.0000 sec  
 PW1 5.75 usec  
 IRNUC 1H  
 CTEMP 23.3 c  
 SLVNT CDCL3  
 EXREF 77.00 ppm  
 BF 0.20 Hz  
 RGAIN 27

Methyl 5-(4-chlorophenyl)-4-pentynoate (S2i)

GH-1358-1H

C:\Documents and Settings\ALPHA\ff\X\N/g/b\N\Uozumi\G\Hamazaki\GH-1358-1H.als

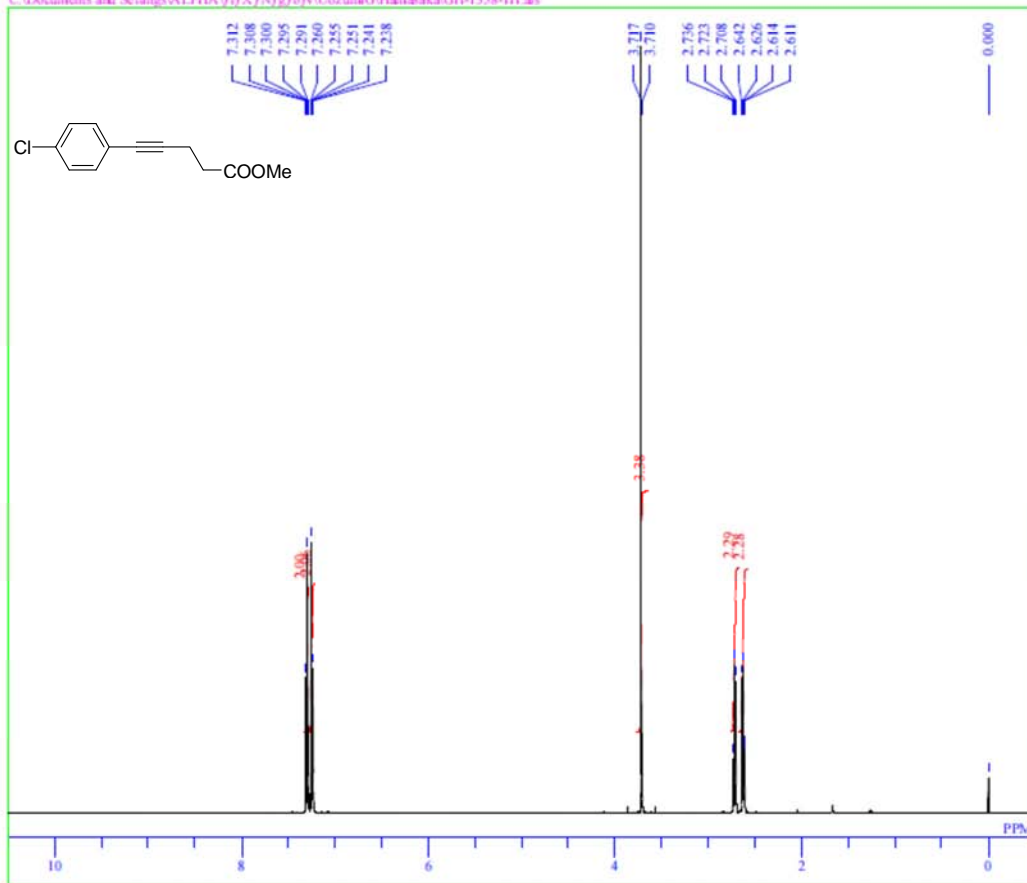

DFILE GH-1358-1H.als  
 COMNT GH-1358-1H  
 DATIM Fri Dec 07 17:18:22 2012  
 OBNUC 1H  
 EXMOD SINGL  
 OBFREQ 500.00 MHz  
 OBSSET 0.00 KHz  
 OBFIN 162410.00 Hz  
 POINT 16384  
 FREQU 10000.00 Hz  
 SCANS 16  
 ACQTM 1.6384 sec  
 PD 2.0000 sec  
 PW1 6.40 usec  
 IRNUC 1H  
 CTEMP 22.0 c  
 SLVNT CDCL3  
 EXREF 0.00 ppm  
 BF 0.00 Hz  
 RGAIN 14

GH-1358-13C

C:\Documents and Settings\ALPHA\ff\X\N/g/b\N\Uozumi\G\Hamazaki\GH-1358-13C.als

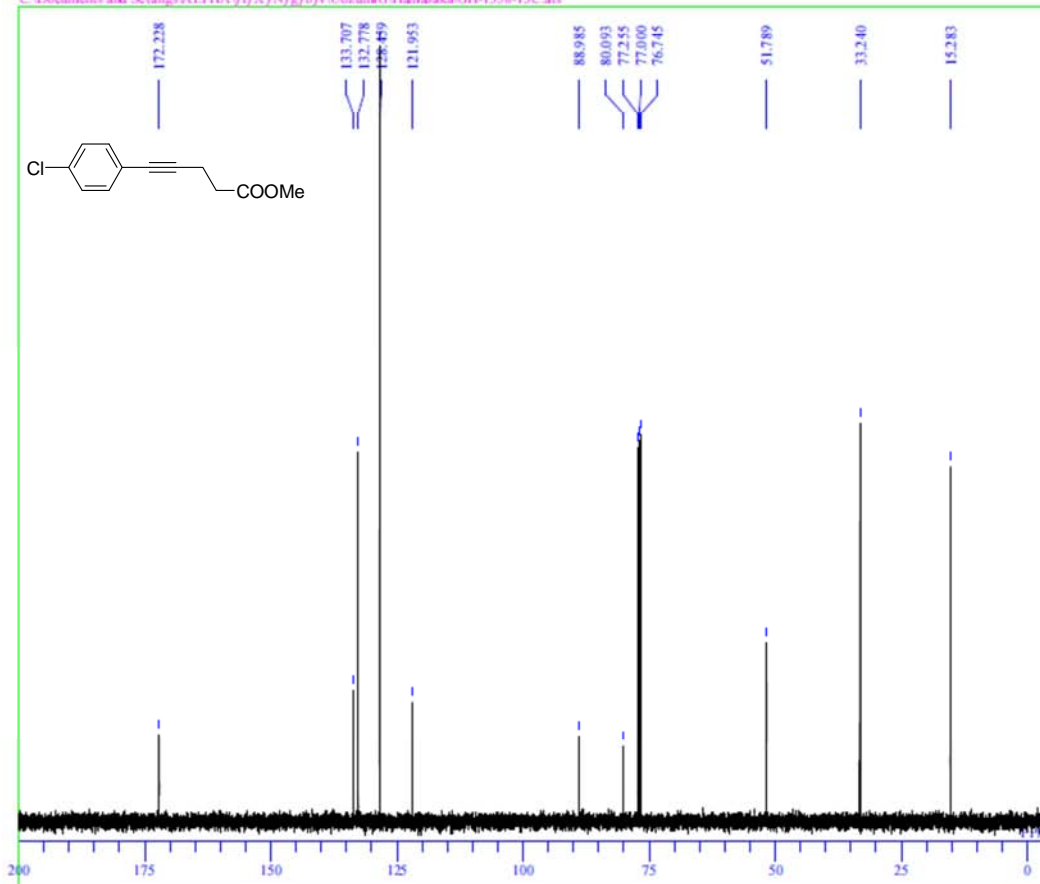

DFILE GH-1358-13C.als  
 COMNT GH-1358-13C  
 DATIM Fri Dec 07 17:27:01 2012  
 OBNUC 13C  
 EXMOD SINGL  
 OBFREQ 125.65 MHz  
 OBSSET 0.00 KHz  
 OBFIN 127958.00 Hz  
 POINT 32768  
 FREQU 33898.30 Hz  
 SCANS 177  
 ACQTM 0.9667 sec  
 PD 1.0000 sec  
 PW1 5.75 usec  
 IRNUC 13C  
 CTEMP 24.1 c  
 SLVNT CDCL3  
 EXREF 77.00 ppm  
 BF 0.40 Hz  
 RGAIN 27

Methyl 5-(2-Methylphenyl)-4-pentynoate (**S2j**)

GH-1258-Fr18-24-1H

C:\Documents and Settings\ALPHA\ffX\N/g/b/v/Uozumi\G\Hamakata\GH-1258-Fr18-24-1H.als

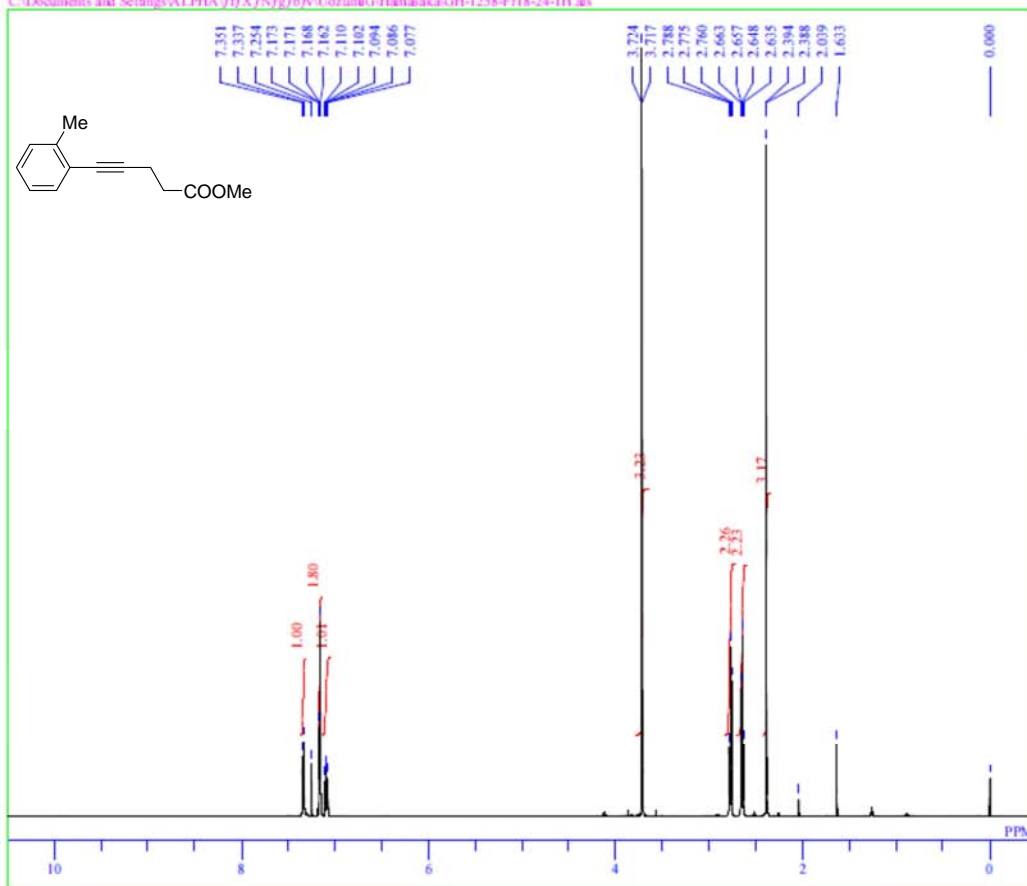

DFILE GH-1258-Fr18-24-1H.als  
 COMNT GH-1258-Fr18-24-1H  
 DATIM Wed Aug 08 17:39:40 2012  
 OBNUC 1H  
 EXMOD SINGL  
 OBFREQ 500.00 MHz  
 OBSET 0.00 KHz  
 OBFIN 162410.00 Hz  
 POINT 16384  
 FREQU 10000.00 Hz  
 SCANS 16  
 ACQTM 1.6384 sec  
 PD 2.0000 sec  
 PWI 6.40 usec  
 IRNUC 1H  
 CTEMP 24.9 c  
 SLVNT CDCL3  
 EXREF 0.00 ppm  
 BF 0.00 Hz  
 RGAIN 15

GH-1258-Fr18-24-13C

C:\Documents and Settings\ALPHA\ffX\N/g/b/v/Uozumi\G\Hamakata\GH-1258-Fr18-24-13C.als

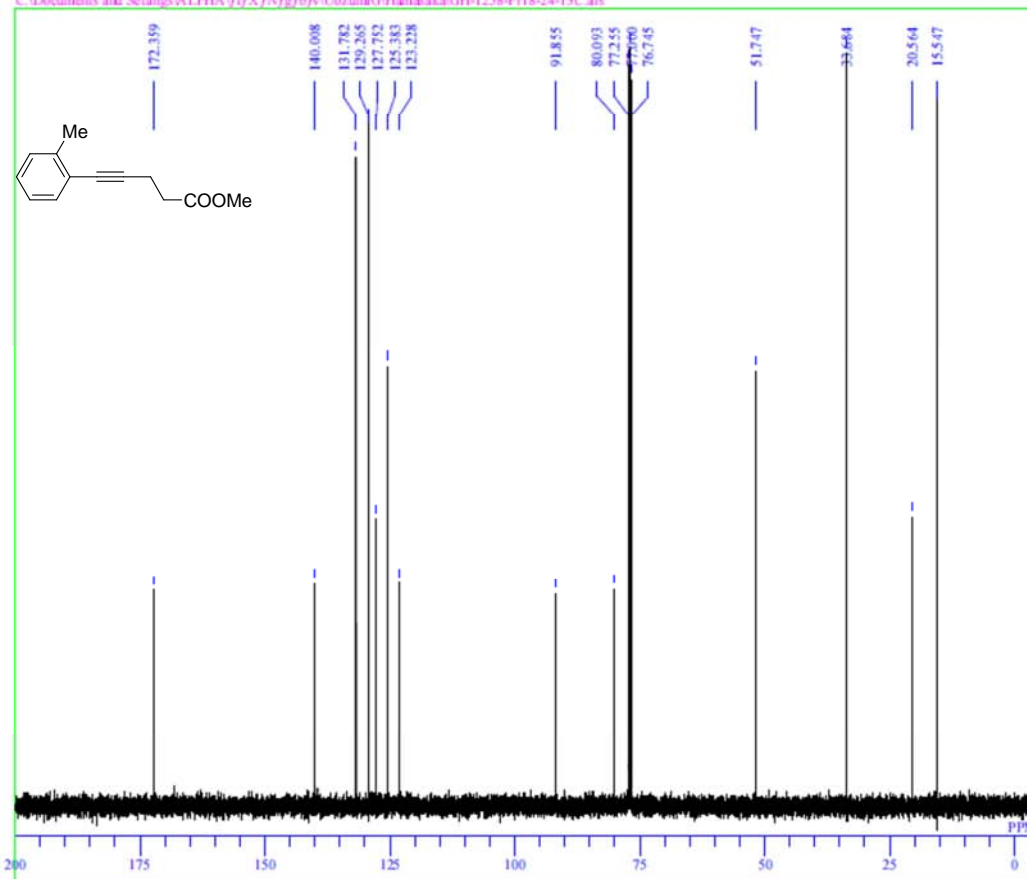

DFILE GH-1258-Fr18-24-13C.als  
 COMNT GH-1258-Fr18-24-13C  
 DATIM Wed Aug 08 18:01:03 2012  
 OBNUC 13C  
 EXMOD SINGL  
 OBFREQ 125.65 MHz  
 OBSET 0.00 KHz  
 OBFIN 127958.00 Hz  
 POINT 32768  
 FREQU 33898.30 Hz  
 SCANS 474  
 ACQTM 0.9667 sec  
 PD 1.0000 sec  
 PWI 5.75 usec  
 IRNUC 13C  
 CTEMP 26.7 c  
 SLVNT CDCL3  
 EXREF 77.00 ppm  
 BF 0.20 Hz  
 RGAIN 26

Methyl 5-(1-naphthyl)-4-pentynoate (S2k)

GH-1492-1H

C:\Documents and Settings\ALPHA\ff\X\N/g/b/v/UozumiGHamasaka\GH-1492-1H.als

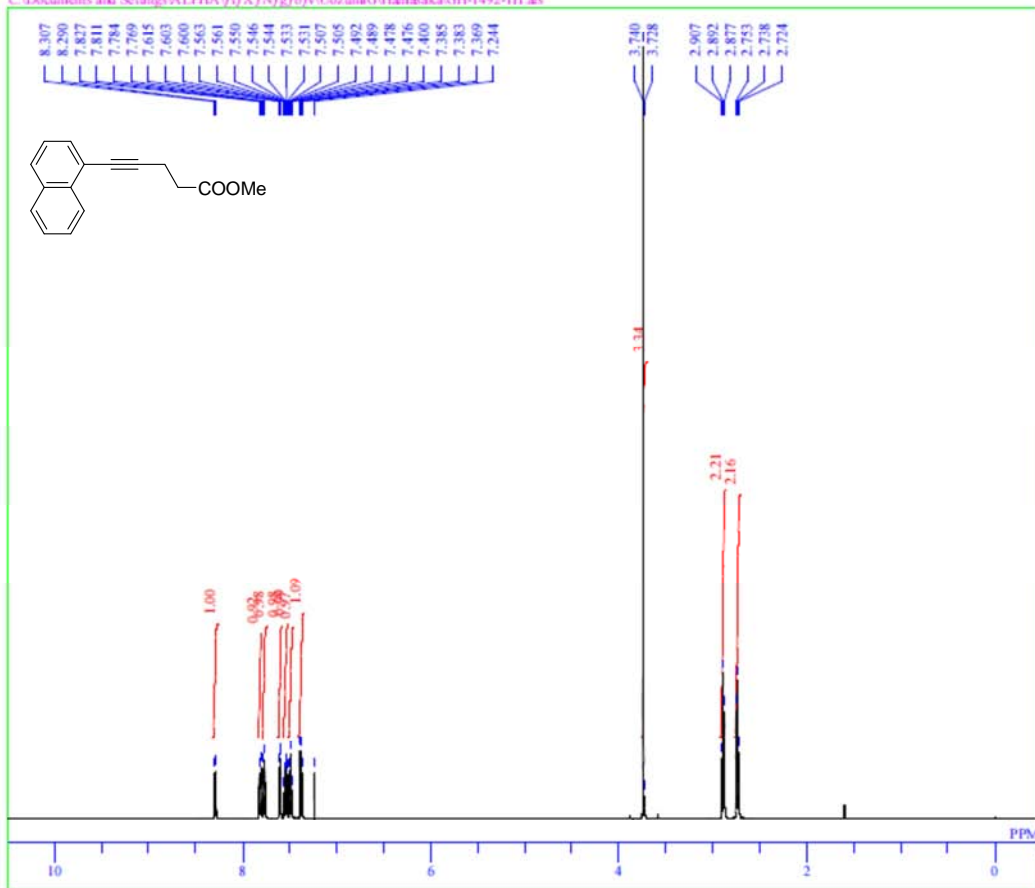

DFILE GH-1492-1H.als  
 COMNT GH-1492-1H  
 DATIM Fri Mar 15 19:35:51 2013  
 OBNUC 1H  
 EXMOD SINGL  
 OBFREQ 500.00 MHz  
 OBSET 0.00 KHz  
 OBFIN 162410.00 Hz  
 POINT 16384  
 FREQU 10000.00 Hz  
 SCANS 16  
 ACQTM 1.6384 sec  
 PD 2.0000 sec  
 PWI 6.40 usec  
 IRNUC 1H  
 CTEMP 22.2 c  
 SLVNT CDCL3  
 EXREF 0.00 ppm  
 BF 0.00 Hz  
 RGAIN 16

GH-1492-13C

C:\Documents and Settings\ALPHA\ff\X\N/g/b/v/UozumiGHamasaka\GH-1492-13C.als

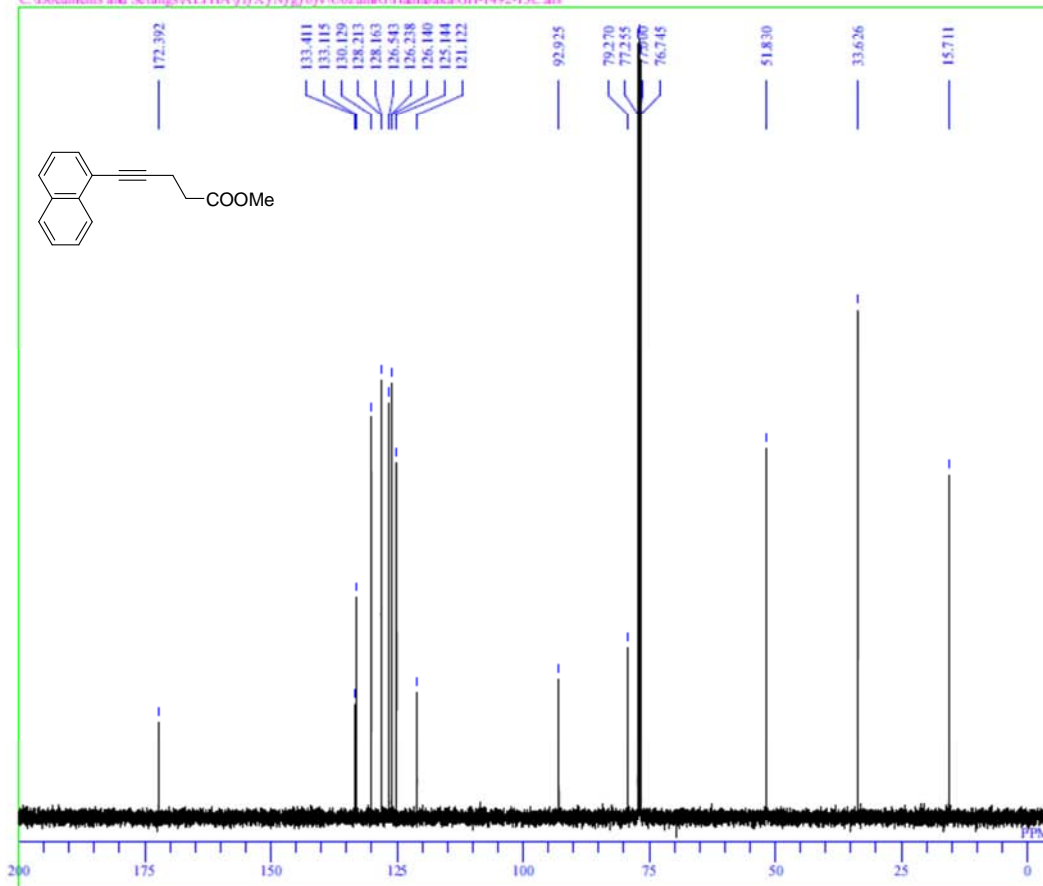

DFILE GH-1492-13C.als  
 COMNT GH-1492-13C  
 DATIM Fri Mar 15 20:05:17 2013  
 OBNUC 13C  
 EXMOD SINGL  
 OBFREQ 125.65 MHz  
 OBSET 0.00 KHz  
 OBFIN 127958.00 Hz  
 POINT 32768  
 FREQU 33898.30 Hz  
 SCANS 795  
 ACQTM 0.9667 sec  
 PD 1.0000 sec  
 PWI 5.75 usec  
 IRNUC 1H  
 CTEMP 23.7 c  
 SLVNT CDCL3  
 EXREF 77.00 ppm  
 BF 0.30 Hz  
 RGAIN 26

Methyl 5-(2-thienyl)-4-pentynoate (**S21**)

GH-1493-1H

C:\Documents and Settings\ALPHA\ff\X\N\g\b\A\Uozumi\GHanaka\GH-1493-1H.als

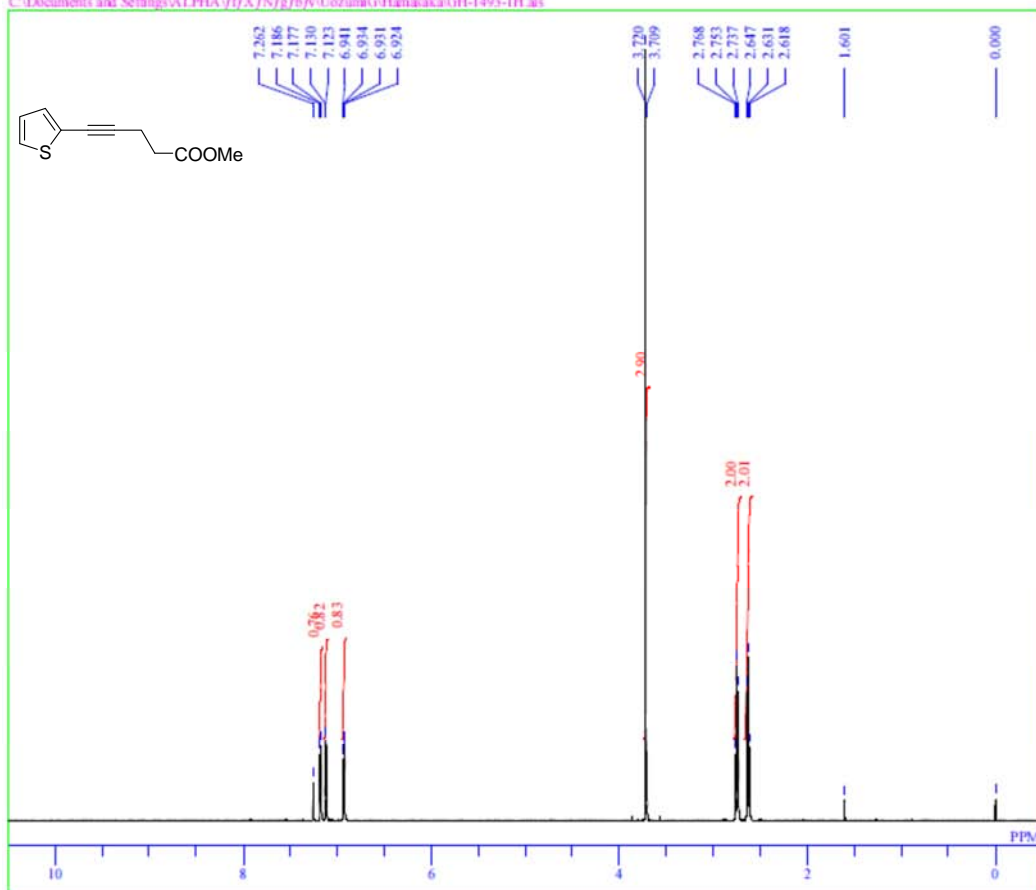

DFILE GH-1493-1H.als  
 COMNT GH-1493-1H  
 DATIM Mon Mar 04 22:50:27 2013  
 OBNUC 1H  
 EXMOD SINGL  
 OBFREQ 500.00 MHz  
 OBSET 0.00 KHz  
 OBFIN 162410.00 Hz  
 POINT 16384  
 FREQU 10000.00 Hz  
 SCANS 16  
 ACQTM 1.6384 sec  
 PD 2.0000 sec  
 PWI 6.40 usec  
 IRNUC 1H  
 CTEMP 22.3 c  
 SLVNT CDCL3  
 EXREF 0.00 ppm  
 BF 0.00 Hz  
 RGAIN 16

GH-1493-13C

C:\Documents and Settings\ALPHA\ff\X\N\g\b\A\Uozumi\GHanaka\GH-1493-13C.als

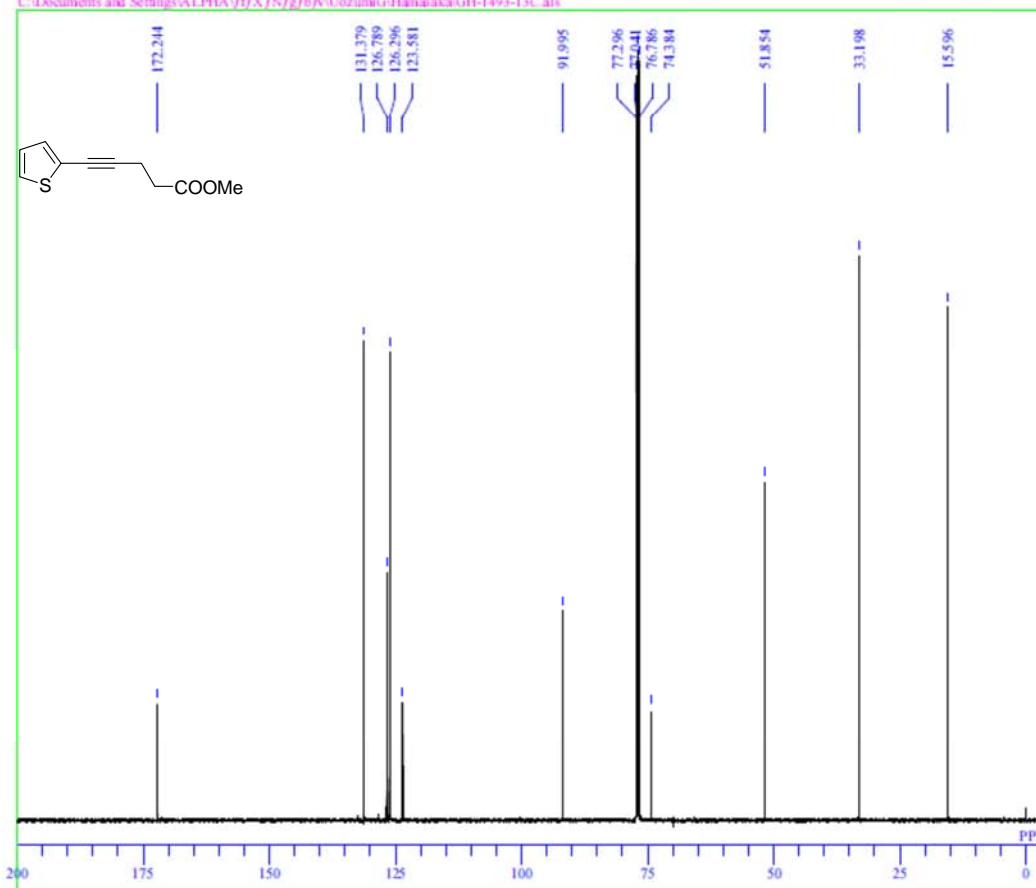

DFILE GH-1493-13C.als  
 COMNT GH-1493-13C  
 DATIM Tue Mar 05 09:47:03 2013  
 OBNUC 13C  
 EXMOD SINGL  
 OBFREQ 125.65 MHz  
 OBSET 0.00 KHz  
 OBFIN 127958.00 Hz  
 POINT 32768  
 FREQU 33898.30 Hz  
 SCANS 17701  
 ACQTM 0.9667 sec  
 PD 1.0000 sec  
 PWI 5.75 usec  
 IRNUC 13C  
 CTEMP 23.9 c  
 SLVNT CDCL3  
 EXREF 0.00 ppm  
 BF 0.40 Hz  
 RGAIN 27



5-(4-trifluoromethylphenyl)-4-pentynoic acid (**2a**)

GH-1466-1H

C:\Documents and Settings\ALPHA\fx\N/g/b/A/UozumiGHamasaka\GH-1466-1Hre.als

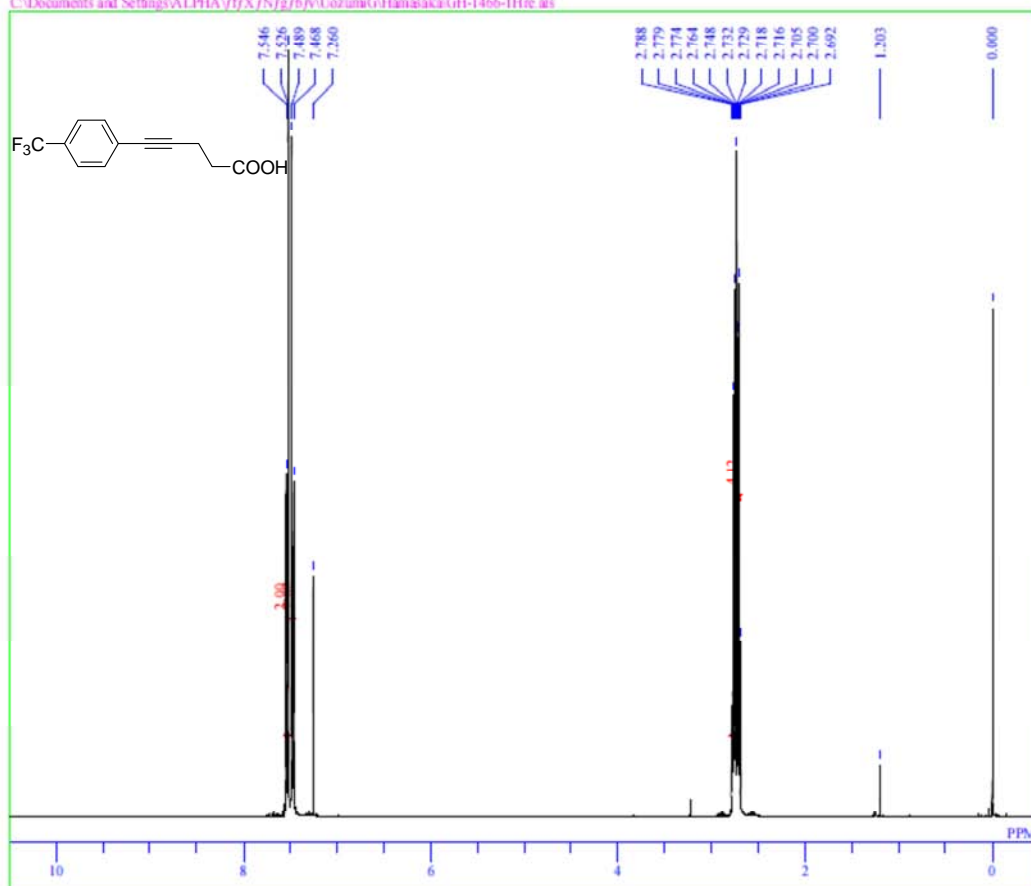

DFILE GH-1466-1Hre.als  
 COMNT GH-1466-1H  
 DATIM 2013-07-03 18:53:14  
 OBNUC 1H  
 EXMOD proton.jxp  
 OBFREQ 395.88 MHz  
 OBSET 6.28 KHz  
 OBFIN 0.87 Hz  
 POINT 16384  
 FREQU 7422.80 Hz  
 SCANS 8  
 ACQTM 2.2073 sec  
 PD 5.0000 sec  
 PWI 3.12 usec  
 IRNUC 1H  
 CTEMP 19.0 c  
 SLVNT CDCL3  
 EXREF 0.00 ppm  
 BF 0.00 Hz  
 RGAIN 34

GH-1466-13C

C:\Documents and Settings\ALPHA\fx\N/g/b/A/UozumiGHamasaka\GH-1466-13C.als

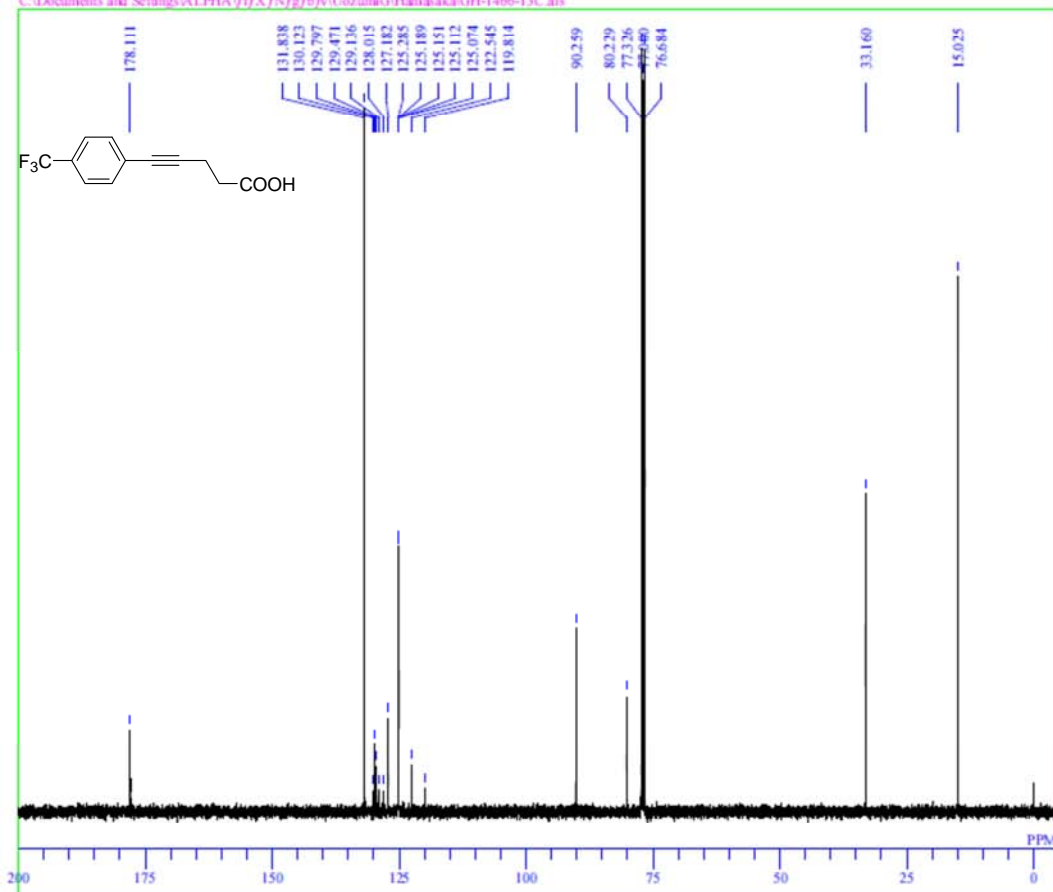

DFILE GH-1466-13C.als  
 COMNT GH-1466-13C  
 DATIM 2013-07-03 18:55:23  
 OBNUC 13C  
 EXMOD carbon.jxp  
 OBFREQ 99.55 MHz  
 OBSET 5.13 KHz  
 OBFIN 0.98 Hz  
 POINT 32767  
 FREQU 31250.00 Hz  
 SCANS 614  
 ACQTM 1.0486 sec  
 PD 2.0000 sec  
 PWI 3.42 usec  
 IRNUC 13C  
 CTEMP 20.1 c  
 SLVNT CDCL3  
 EXREF 77.00 ppm  
 BF 0.50 Hz  
 RGAIN 60

5-Phenyl-4-pentynoic acid (**2b**)

GH-1465-1H

C:\Documents and Settings\ALPHA\1\1X\N/g/b/b/UozumiGHamasaka\GH-1465-1Hre.als

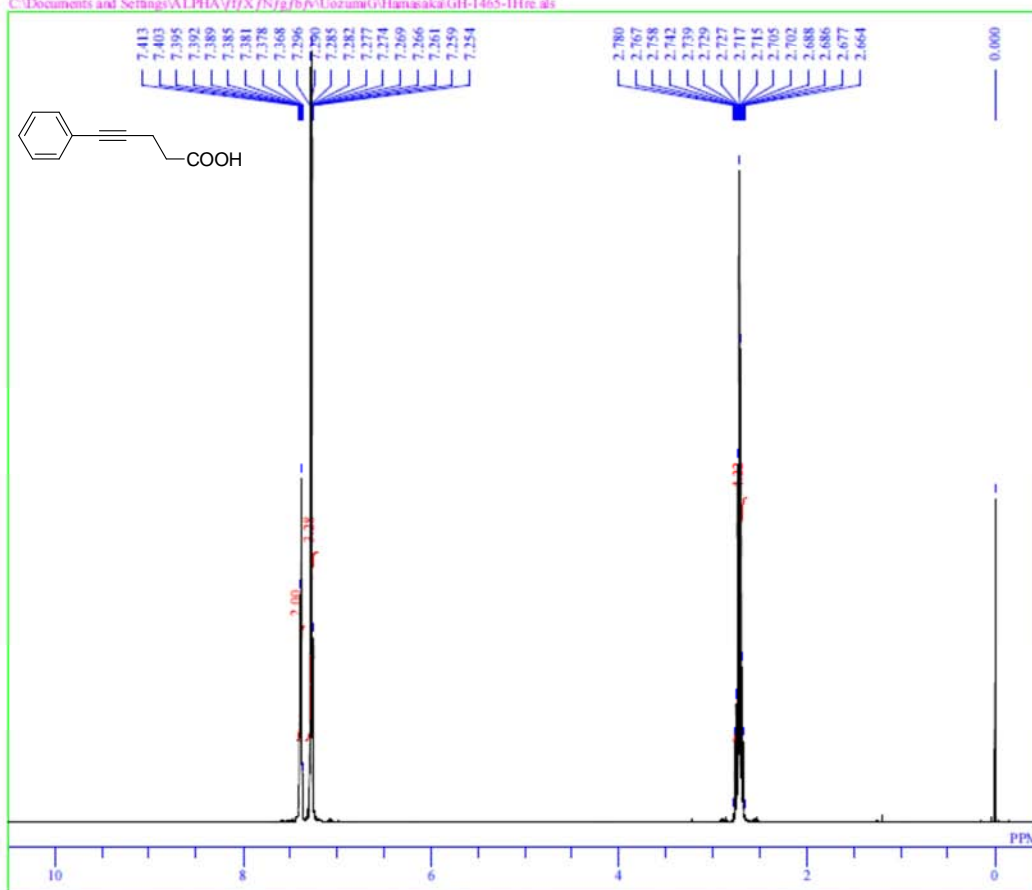

DFILE GH-1465-1Hre.als  
 COMNT GH-1465-1H  
 DATIM 2013-07-03 22:14:05  
 OBNUC 1H  
 EXMOD proton.jxp  
 OBFREQ 395.88 MHz  
 OBSET 6.28 KHz  
 OBFIN 0.87 Hz  
 POINT 16384  
 FREQU 7422.80 Hz  
 SCANS 8  
 ACQTM 2.2073 sec  
 PD 5.0000 sec  
 PWI 3.12 usec  
 IRNUC 1H  
 CTEMP 19.2 c  
 SLVNT CDCL3  
 EXREF 0.00 ppm  
 BF 0.00 Hz  
 RGAIN 32

GH-1465-13C

C:\Documents and Settings\ALPHA\1\1X\N/g/b/b/UozumiGHamasaka\GH-1465-13C.als

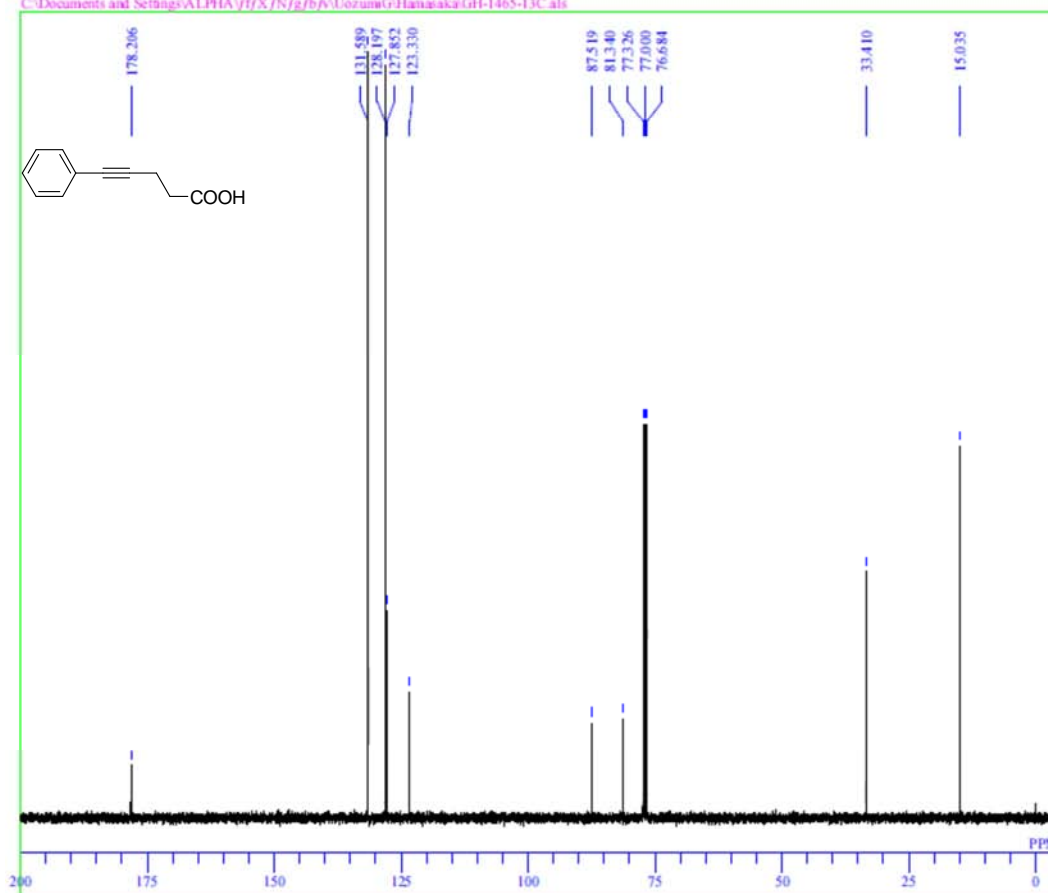

DFILE GH-1465-13C.als  
 COMNT GH-1465-13C  
 DATIM 2013-07-03 22:16:24  
 OBNUC 13C  
 EXMOD carbon.jxp  
 OBFREQ 99.55 MHz  
 OBSET 5.13 KHz  
 OBFIN 0.98 Hz  
 POINT 32767  
 FREQU 31250.00 Hz  
 SCANS 317  
 ACQTM 1.0486 sec  
 PD 2.0000 sec  
 PWI 3.42 usec  
 IRNUC 13C  
 CTEMP 19.3 c  
 SLVNT CDCL3  
 EXREF 77.00 ppm  
 BF 0.50 Hz  
 RGAIN 60

5-(4-methylphenyl)-4-pentynoic acid (**2c**)

GH-1291-1H

C:\Documents and Settings\ALPHA\ff\X\N\g\b\A\Uozumi\G\Hanaka\GH-1291-1Hre.als

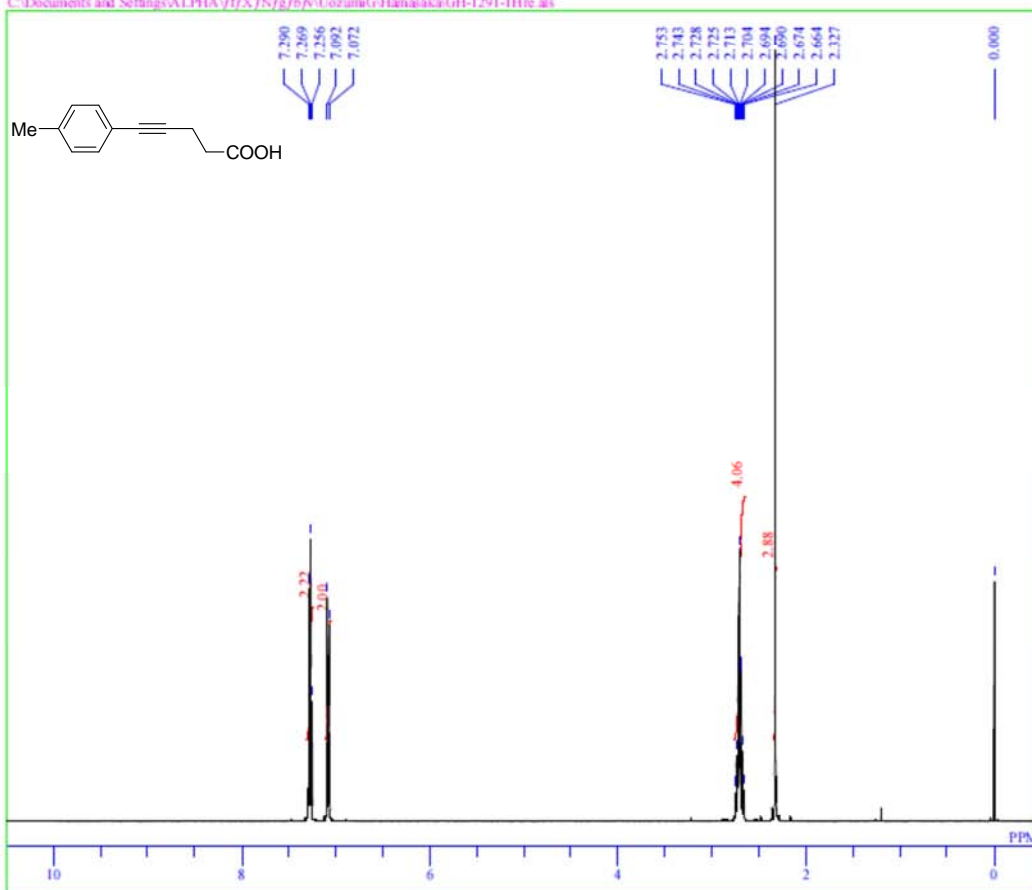

DFILE GH-1291-1Hre.als  
 COMNT GH-1291-1H  
 DATM 2013-07-04 12:27:30  
 OBNUC 1H  
 EXMOD proton.jsp  
 OBFREQ 395.88 MHz  
 OBSFET 6.28 KHz  
 OBFIN 0.87 Hz  
 POINT 16384  
 FREQU 7422.80 Hz  
 SCANS 8  
 ACQTM 2.2073 sec  
 PD 5.0000 sec  
 PWI 3.12 usec  
 IRNUC 1H  
 CTEMP 19.5 c  
 SLVNT CDCL3  
 EXREF 0.00 ppm  
 BF 0.00 Hz  
 RGAIN 32

GH-1291-13C

C:\Documents and Settings\ALPHA\ff\X\N\g\b\A\Uozumi\G\Hanaka\GH-1291-13Cre.als

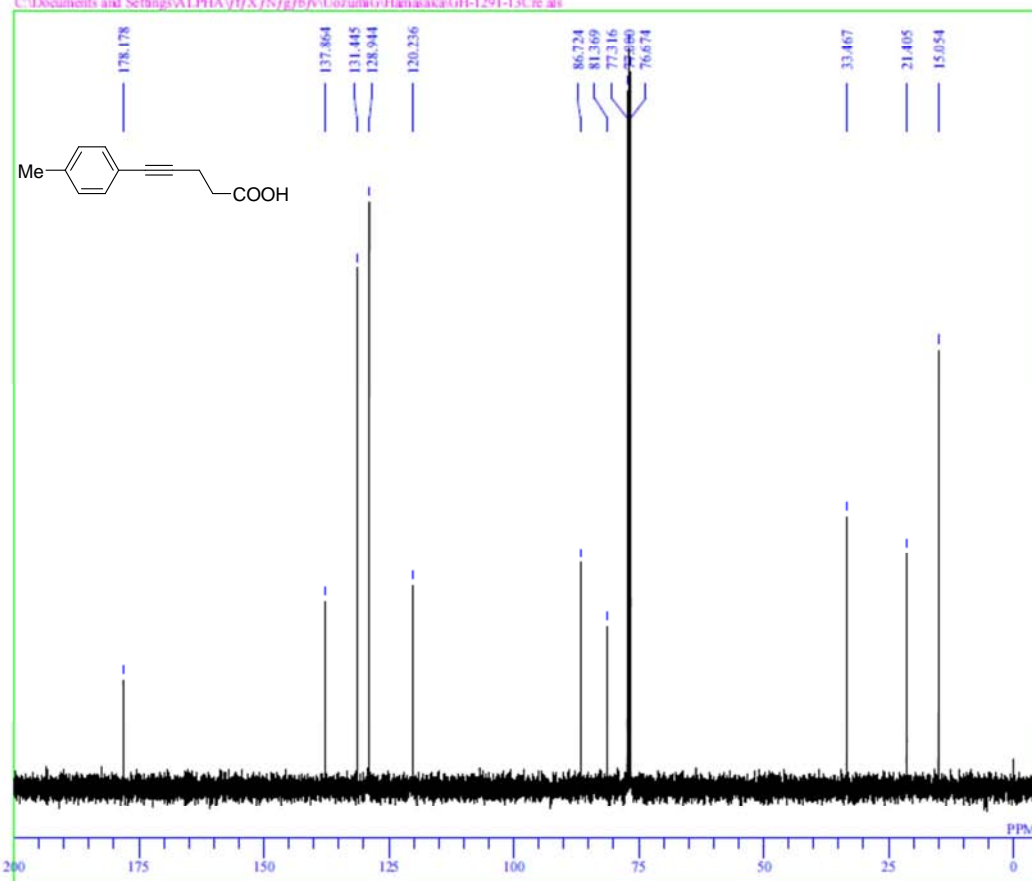

DFILE GH-1291-13Cre.als  
 COMNT GH-1291-13C  
 DATM 2013-07-04 12:29:52  
 OBNUC 13C  
 EXMOD carbon.jsp  
 OBFREQ 99.55 MHz  
 OBSFET 5.13 KHz  
 OBFIN 0.98 Hz  
 POINT 32767  
 FREQU 31250.00 Hz  
 SCANS 129  
 ACQTM 1.0486 sec  
 PD 2.0000 sec  
 PWI 3.42 usec  
 IRNUC 13C  
 CTEMP 19.2 c  
 SLVNT CDCL3  
 EXREF 77.00 ppm  
 BF 0.50 Hz  
 RGAIN 60

5-(4-methoxyphenyl)-4-pentynoic acid (**2d**)

GH-1292-1H

C:\Documents and Settings\ALPHA\ffX\N/g/b/A/UozumiG\Hanasaka\GH-1292-1Hre als

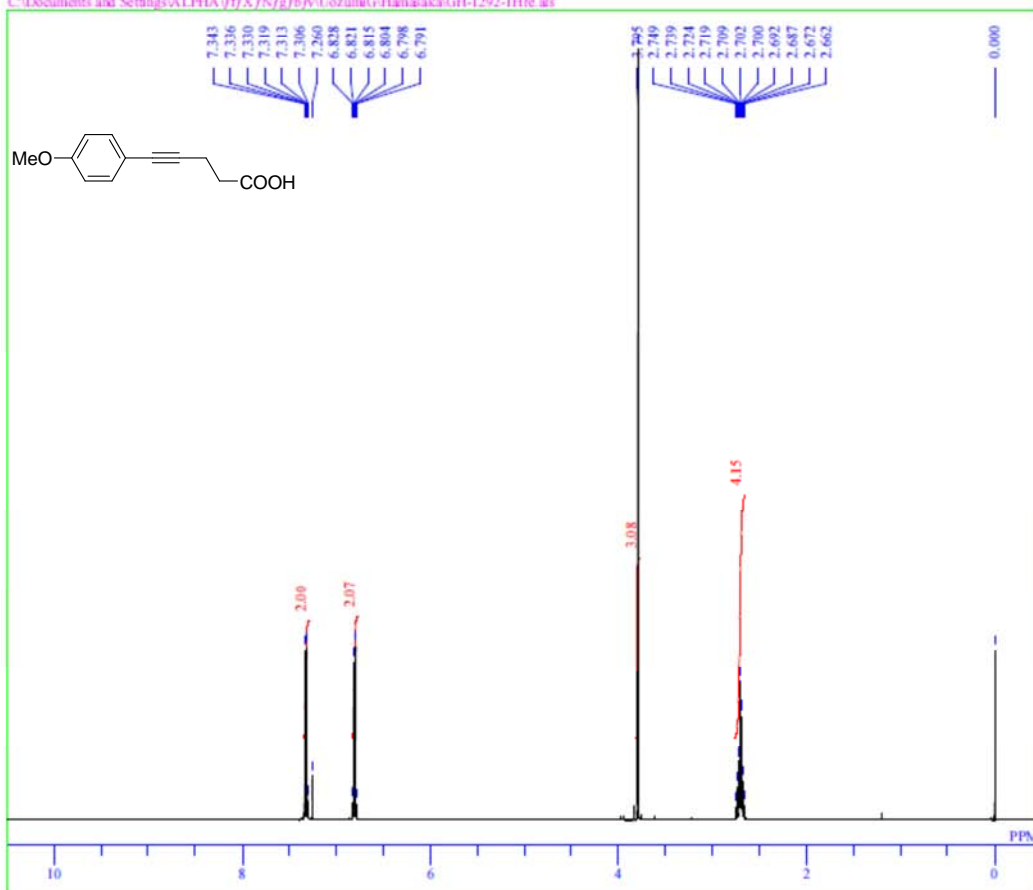

DFILE GH-1292-1Hre als  
 COMNT GH-1292-1H  
 DATIM 2013-07-04 12:42:22  
 OBNUC 1H  
 EXMOD proton.jsp  
 OBFREQ 395.88 MHz  
 OBSET 6.28 KHz  
 OBFIN 0.87 Hz  
 POINT 13107  
 FREQU 5938.24 Hz  
 SCANS 8  
 ACQTM 2.2073 sec  
 PD 5.0000 sec  
 PWI 3.12 usec  
 IRNUC 1H  
 CTEMP 19.0 c  
 SLVNT CDCL3  
 EXREF 0.00 ppm  
 BF 0.00 Hz  
 RGAIN 34

GH-1292-13C

C:\Documents and Settings\ALPHA\ffX\N/g/b/A/UozumiG\Hanasaka\GH-1292-13Cre als

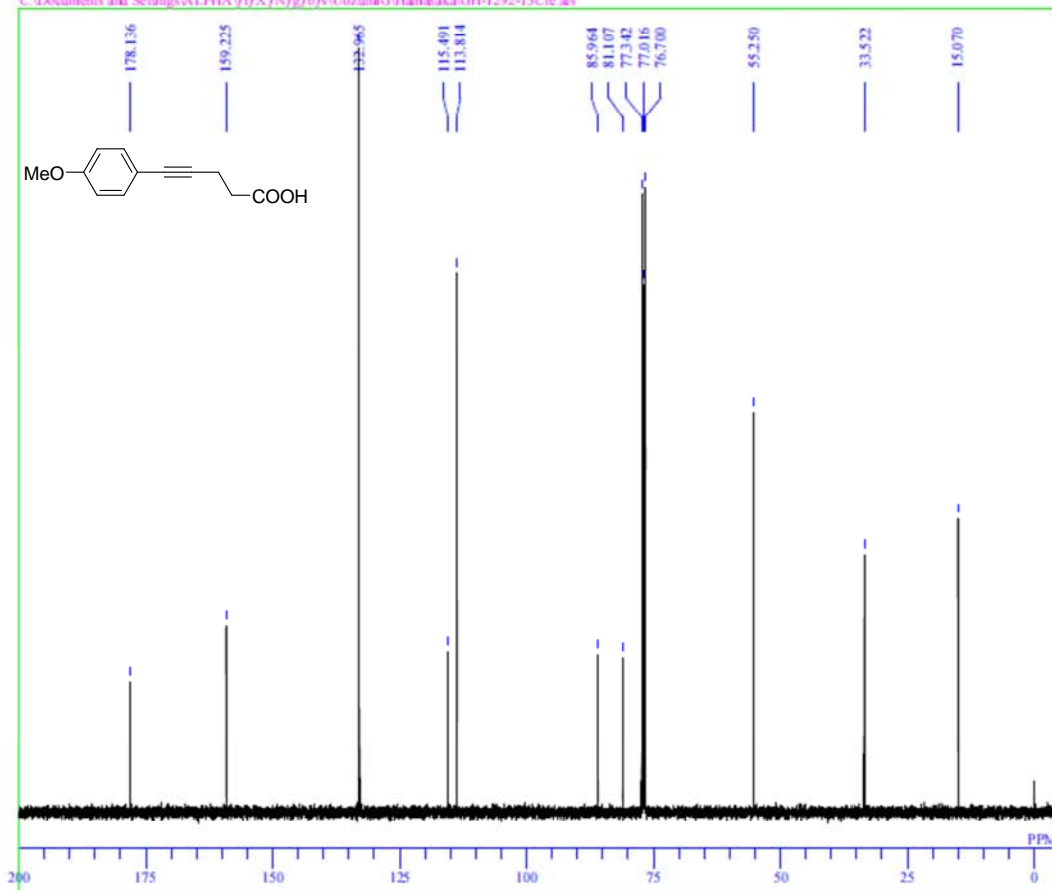

DFILE GH-1292-13Cre als  
 COMNT GH-1292-13C  
 DATIM 2013-07-04 12:44:42  
 OBNUC 13C  
 EXMOD carbon.jsp  
 OBFREQ 99.55 MHz  
 OBSET 5.13 KHz  
 OBFIN 0.98 Hz  
 POINT 32767  
 FREQU 31250.00 Hz  
 SCANS 477  
 ACQTM 1.0486 sec  
 PD 2.0000 sec  
 PWI 3.42 usec  
 IRNUC 13C  
 CTEMP 19.0 c  
 SLVNT CDCL3  
 EXREF 0.00 ppm  
 BF 0.50 Hz  
 RGAIN 60

5-(4-tert-butylphenyl)-4-pentynoic acid (**2e**)

GH-1525-1H

C:\Documents and Settings\ALPHA\ff\X\N\g\fb\Uozumi\GHamasaka\GH-1525-1H.als

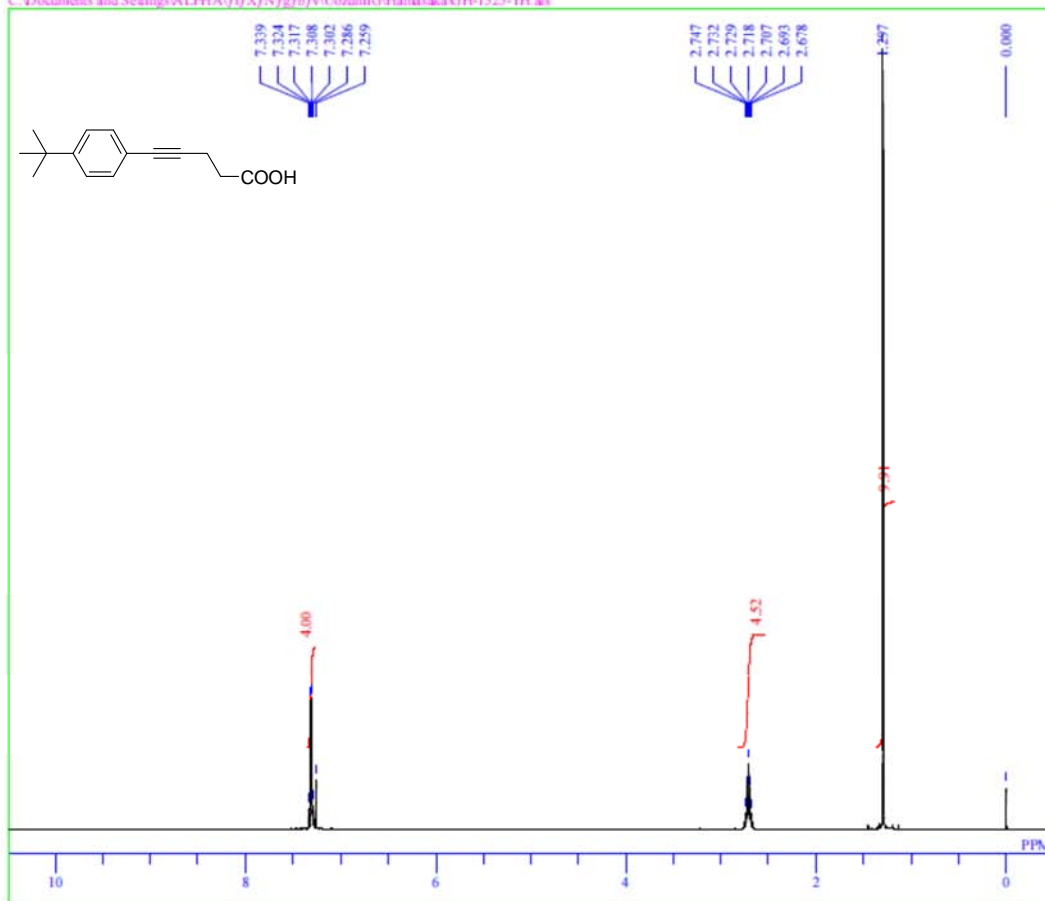

DFILE GH-1525-1H.als  
 COMNT GH-1525-1H  
 DATIM 2013-05-07 22:24:21  
 OBNUC 1H  
 EXMOD proton.jpg  
 OBFRQ 395.88 MHz  
 OBSET 6.28 KHz  
 OBFIN 0.87 Hz  
 POINT 16384  
 FREQU 7422.80 Hz  
 SCANS 8  
 ACQTM 2.2073 sec  
 PD 5.0000 sec  
 PWI 3.12 usec  
 IRNUC 1H  
 CTEMP 18.9 c  
 SLVNT CDCL3  
 EXREF 0.00 ppm  
 BF 0.00 Hz  
 RGAIN 34

GH-1525-13C

C:\Documents and Settings\ALPHA\ff\X\N\g\fb\Uozumi\GHamasaka\GH-1525-13C.als

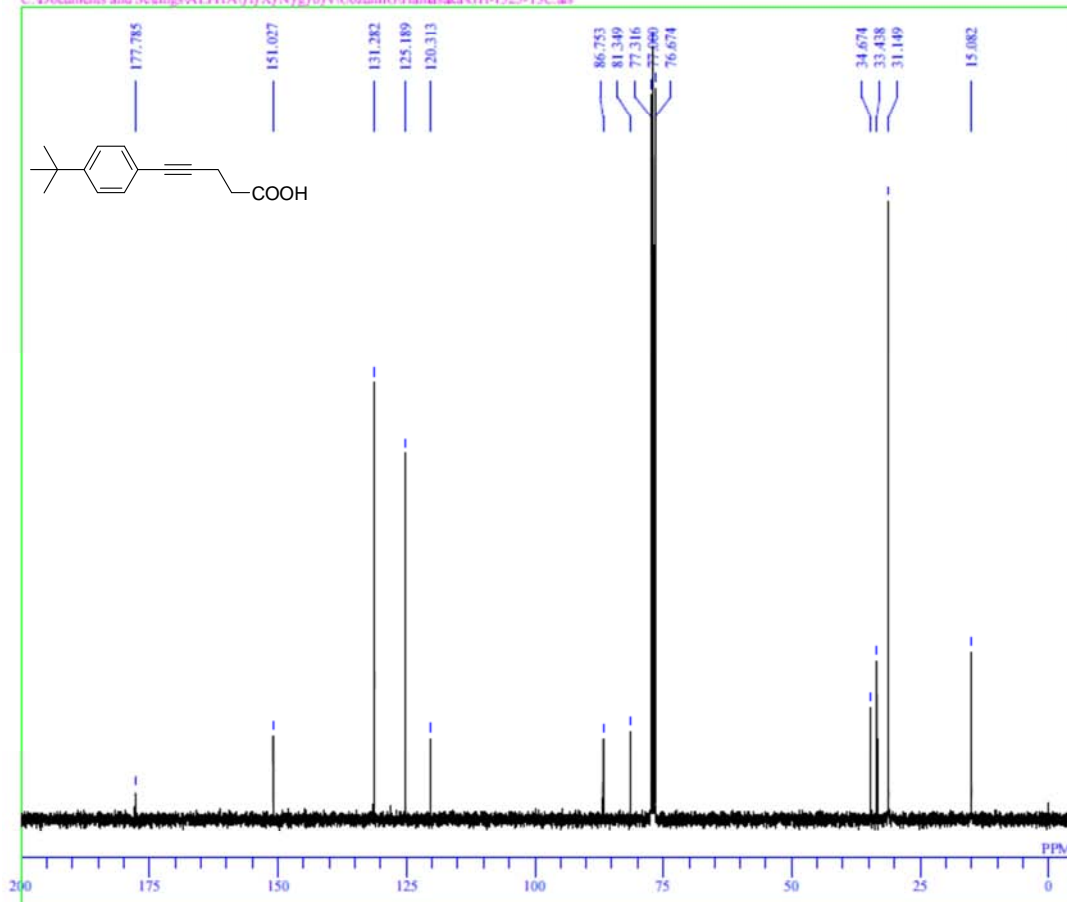

DFILE GH-1525-13C.als  
 COMNT GH-1525-13C  
 DATIM 2013-05-07 22:27:23  
 OBNUC 13C  
 EXMOD carbon.jpg  
 OBFRQ 99.55 MHz  
 OBSET 5.13 KHz  
 OBFIN 0.98 Hz  
 POINT 32767  
 FREQU 31250.00 Hz  
 SCANS 458  
 ACQTM 1.0486 sec  
 PD 2.0000 sec  
 PWI 3.42 usec  
 IRNUC 13C  
 CTEMP 18.8 c  
 SLVNT CDCL3  
 EXREF 77.00 ppm  
 BF 1.00 Hz  
 RGAIN 60

5-(4-phenylphenyl)-4-pentynoic acid (**2f**)

**GH-1342-1H**

C:\Documents and Settings\ALPHA\ff\X\N\g\fb\Uozumi\GH-1342-1Hre.als

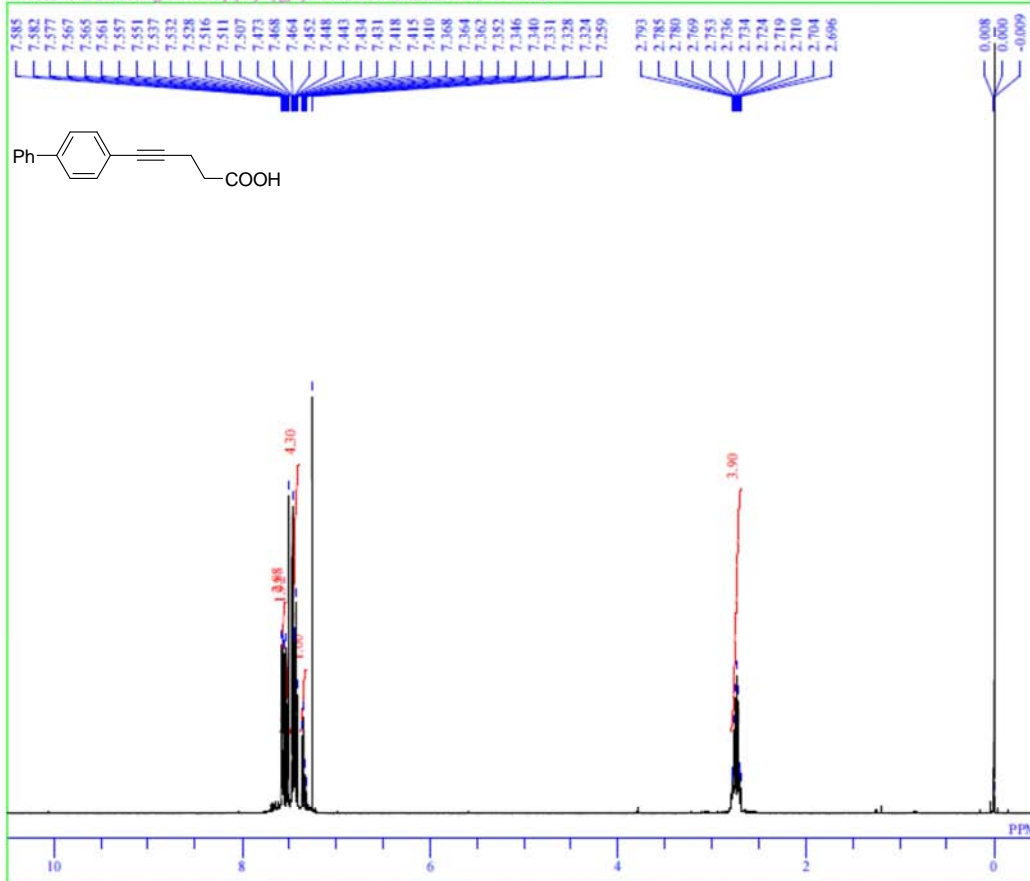

DFILE GH-1342-1Hre.als  
 COMNT GH-1342-1H  
 DATIM 2013-07-04 13:48:58  
 OBNUC 1H  
 EXMOD proton.jsp  
 OBFREQ 395.88 MHz  
 OBSSET 6.28 KHz  
 OBFIN 0.87 Hz  
 POINT 16384  
 FREQU 7422.80 Hz  
 SCANS 8  
 ACQTM 2.2073 sec  
 PD 5.0000 sec  
 PWI 3.12 usec  
 IRNUC 1H  
 CTEMP 19.1 c  
 SLVNT CDCL3  
 EXREF 0.00 ppm  
 BF 0.00 Hz  
 RGAIN 40

**GH-1342-13C**

C:\Documents and Settings\ALPHA\ff\X\N\g\fb\Uozumi\GH-1342-13C.als

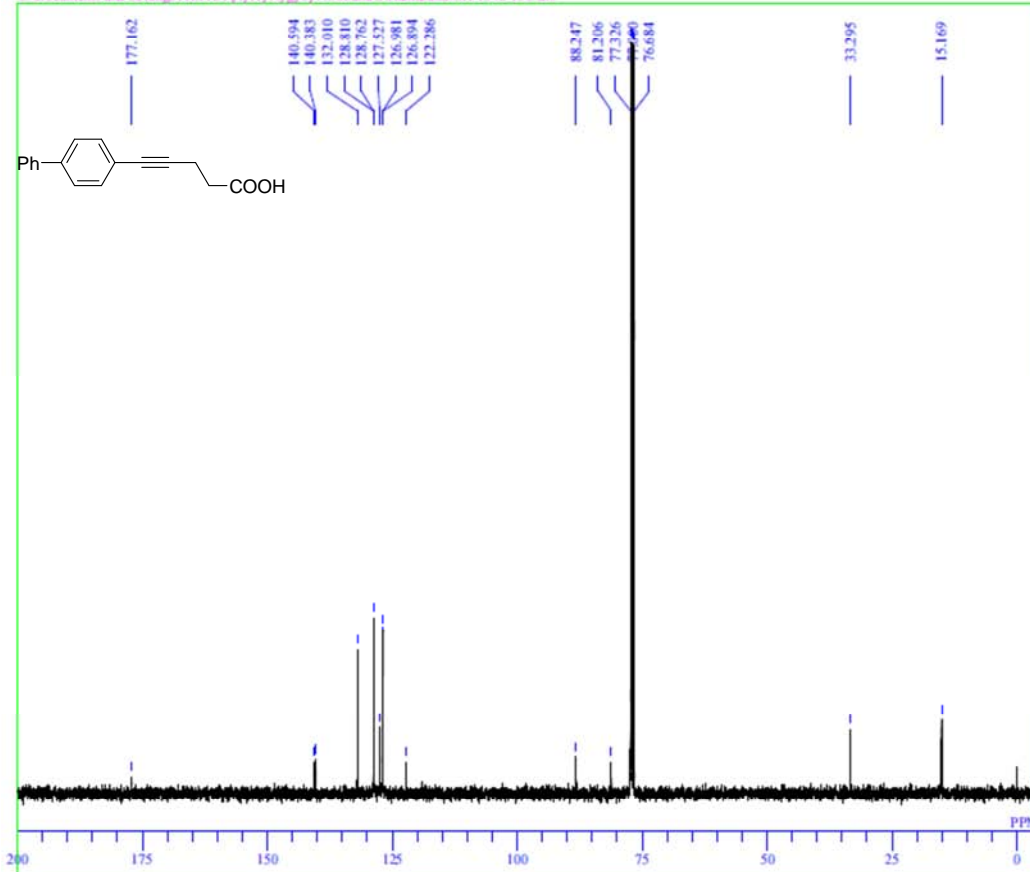

DFILE GH-1342-13C.als  
 COMNT GH-1342-13C  
 DATIM 2013-07-04 13:50:57  
 OBNUC 13C  
 EXMOD carbon.jsp  
 OBFREQ 99.55 MHz  
 OBSSET 5.13 KHz  
 OBFIN 0.98 Hz  
 POINT 32767  
 FREQU 31250.00 Hz  
 SCANS 461  
 ACQTM 1.0486 sec  
 PD 2.0000 sec  
 PWI 3.42 usec  
 IRNUC 1H  
 CTEMP 19.7 c  
 SLVNT CDCL3  
 EXREF 77.00 ppm  
 BF 1.50 Hz  
 RGAIN 60

5-(4-nitrophenyl)-4-pentynoic acid (**2g**)

GH-1301-1H

C:\Documents and Settings\ALPHA\I\X\N/g/b/v/UozumiG\Hamasaki\GH-1301-1Hre.als

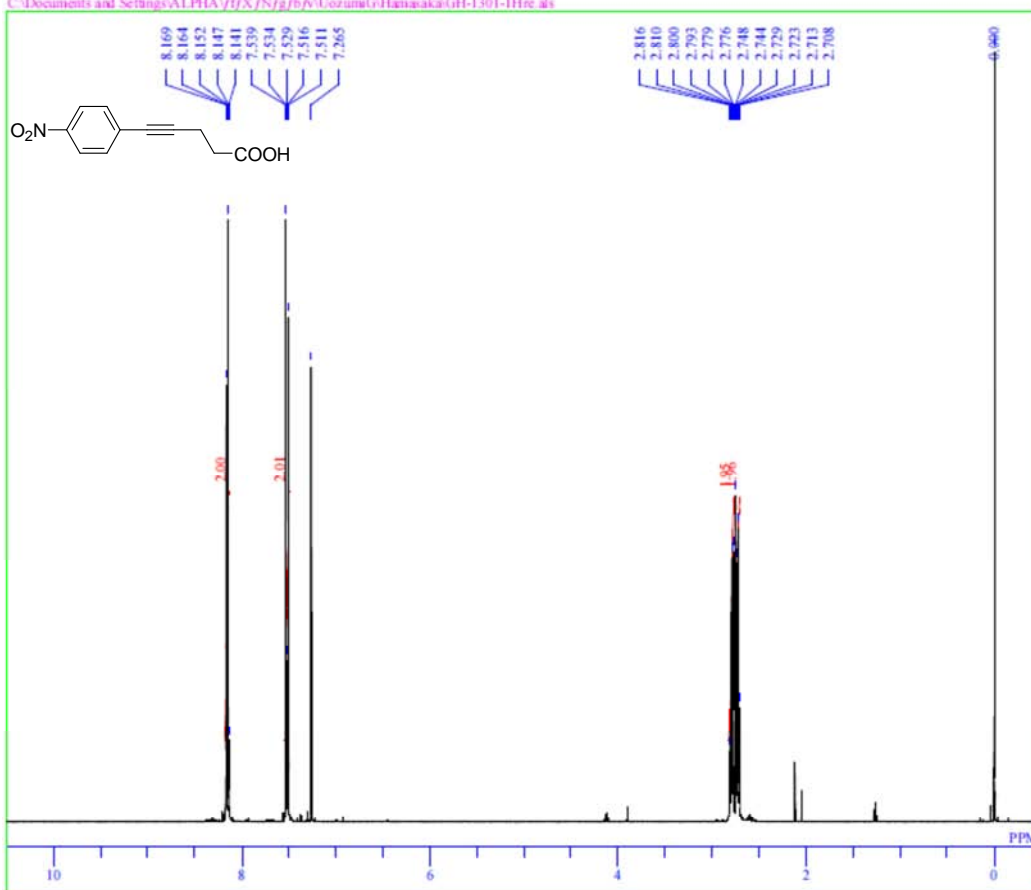

DFILE GH-1301-1Hre.als  
 COMNT GH-1301-1H  
 DATIM 2013-07-04 12:07:13  
 OBNUC 1H  
 EXMOD proton.jsp  
 OBFRQ 395.88 MHz  
 OBSET 6.28 KHz  
 OBFIN 0.87 Hz  
 POINT 16384  
 FREQU 7422.80 Hz  
 SCANS 8  
 ACQTM 2.2073 sec  
 PD 5.0000 sec  
 PWI 3.12 usec  
 IRNUC 1H  
 CTEMP 19.5 c  
 SLVNT CDCL3  
 EXREF 0.00 ppm  
 BF 0.00 Hz  
 RGAIN 40

GH-1301-13C

C:\Documents and Settings\ALPHA\I\X\N/g/b/v/UozumiG\Hamasaki\GH-1301-13C.als

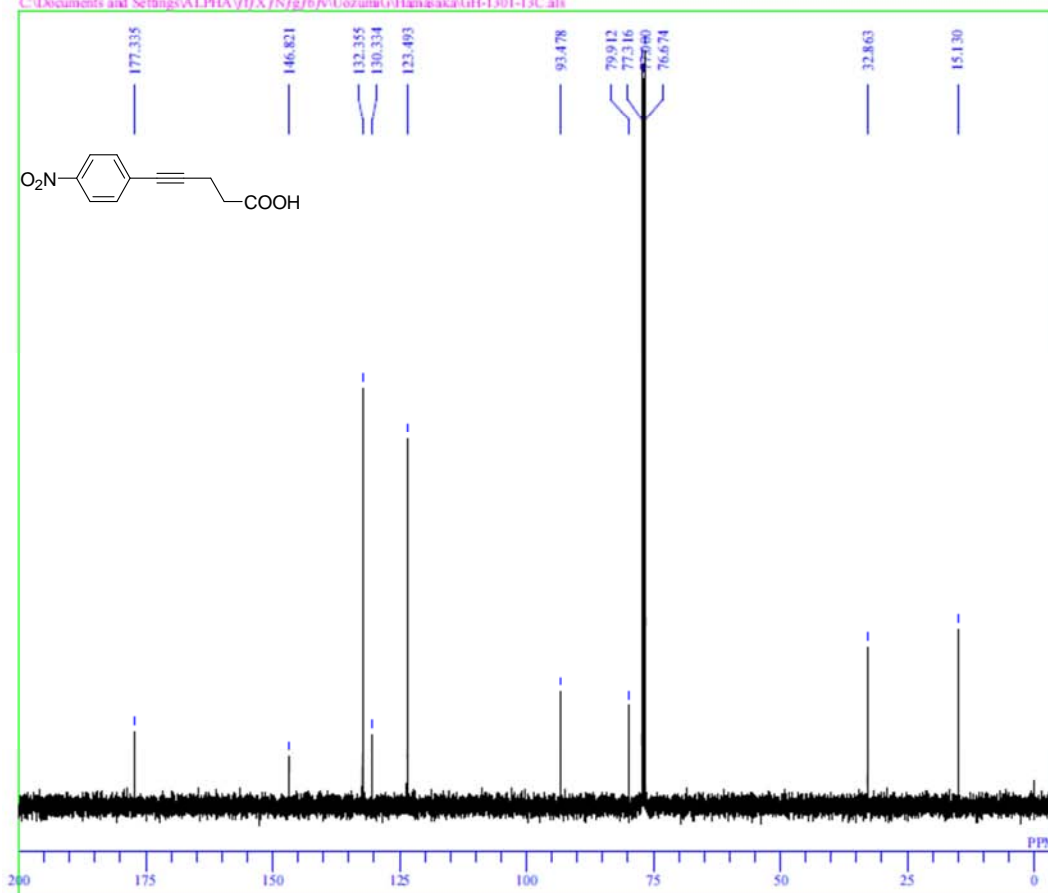

DFILE GH-1301-13C.als  
 COMNT GH-1301-13C  
 DATIM 2013-07-04 12:09:46  
 OBNUC 13C  
 EXMOD carbon.jsp  
 OBFRQ 99.55 MHz  
 OBSET 5.13 KHz  
 OBFIN 0.98 Hz  
 POINT 32767  
 FREQU 31250.00 Hz  
 SCANS 215  
 ACQTM 1.0486 sec  
 PD 2.0000 sec  
 PWI 3.42 usec  
 IRNUC 13H  
 CTEMP 19.1 c  
 SLVNT CDCL3  
 EXREF 77.00 ppm  
 BF 0.50 Hz  
 RGAIN 60

5-(4-fluorophenyl)-4-pentynoic acid (**2h**)

GH-1388-1H1

C:\Documents and Settings\ALPHA\1\1\X\N/g/b/b/Uozumi\GHamasaka\GH-1388-1Hre.als

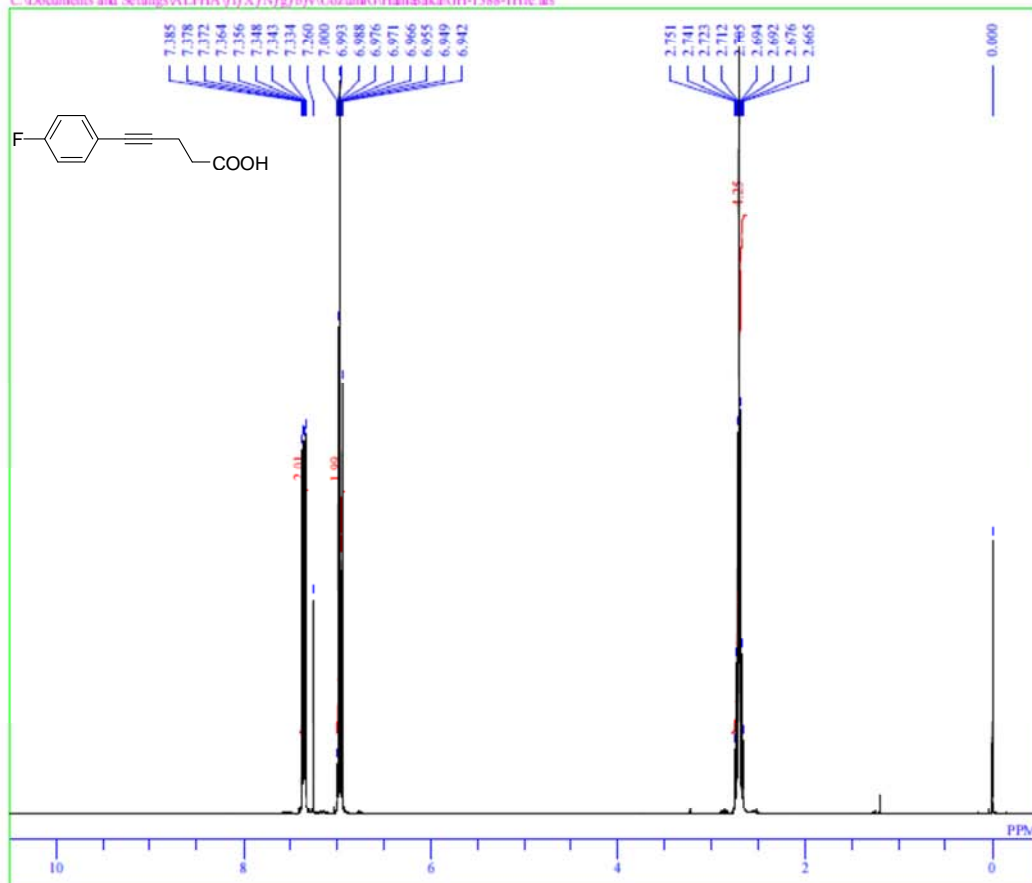

DFILE GH-1388-1Hre.als  
 COMNT GH-1388-1H  
 DATIM 2013-07-03 18:16:02  
 OBNUC 1H  
 EXMOD proton.jsp  
 OBFREQ 395.88 MHz  
 OBSSET 6.28 KHz  
 OBFIN 0.87 Hz  
 POINT 16384  
 FREQU 7422.80 Hz  
 SCANS 8  
 ACQTM 2.2073 sec  
 PD 5.0000 sec  
 PWI 3.12 usec  
 IRNUC 1H  
 CTEMP 19.4 c  
 SLVNT CDCL3  
 EXREF 0.00 ppm  
 BF 0.00 Hz  
 RGAIN 34

GH-1388-13C

C:\Documents and Settings\ALPHA\1\1\X\N/g/b/b/Uozumi\GHamasaka\GH-1388-13Cre.als

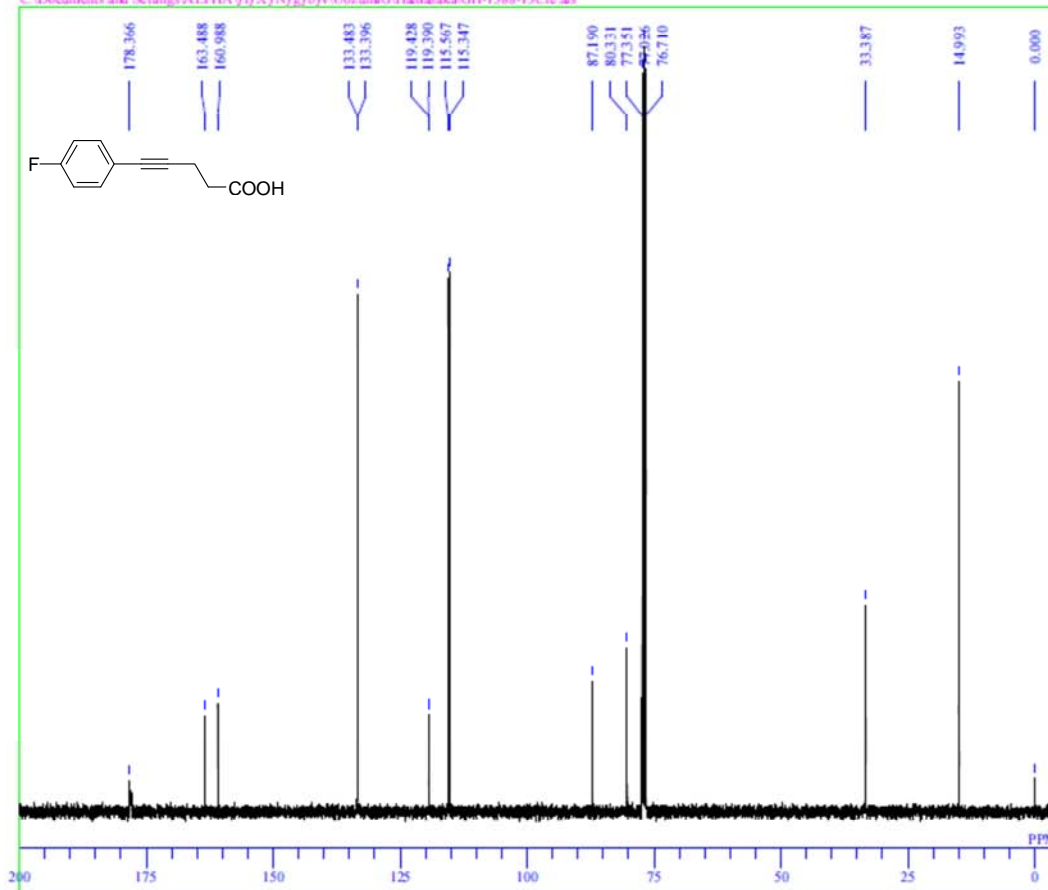

DFILE GH-1388-13Cre.als  
 COMNT GH-1388-13C  
 DATIM 2013-07-03 18:18:14  
 OBNUC 13C  
 EXMOD carbon.jsp  
 OBFREQ 99.55 MHz  
 OBSSET 5.13 KHz  
 OBFIN 0.98 Hz  
 POINT 32767  
 FREQU 31250.00 Hz  
 SCANS 565  
 ACQTM 1.0486 sec  
 PD 2.0000 sec  
 PWI 3.42 usec  
 IRNUC 1H  
 CTEMP 19.6 c  
 SLVNT CDCL3  
 EXREF 0.00 ppm  
 BF 1.00 Hz  
 RGAIN 60



5-(4-chlorophenyl)-4-pentynoic acid (**2i**)

GH-1363-1H

C:\Documents and Settings\ALPHA\fx\N/g/b/A/UozumiG\Hamasaki\GH-1363-1H\_re.als

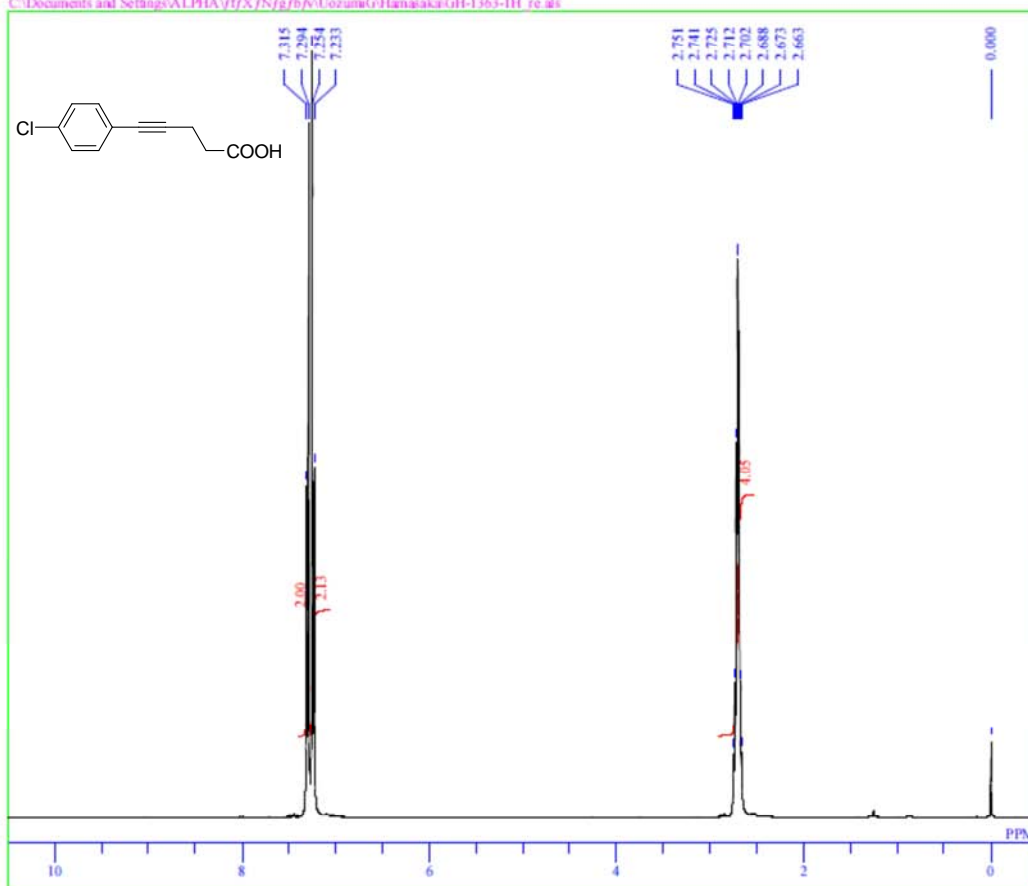

DFILE GH-1363-1H\_re.als  
 COMNT GH-1363-1H  
 DATIM 2013-07-03 16:51:51  
 OBNUC 1H  
 EXMOD proton.jxp  
 OBFREQ 395.88 MHz  
 OBSET 6.28 KHz  
 OBFIN 0.87 Hz  
 POINT 16384  
 FREQU 7422.80 Hz  
 SCANS 8  
 ACQTM 2.2073 sec  
 PD 5.0000 sec  
 PWI 3.12 usec  
 IRNUC 1H  
 CTEMP 20.7 c  
 SLVNT CDCL3  
 EXREF 0.00 ppm  
 BF 0.00 Hz  
 RGAIN 28

GH-1363-13C

C:\Documents and Settings\ALPHA\fx\N/g/b/A/UozumiG\Hamasaki\GH-1363-13C.als

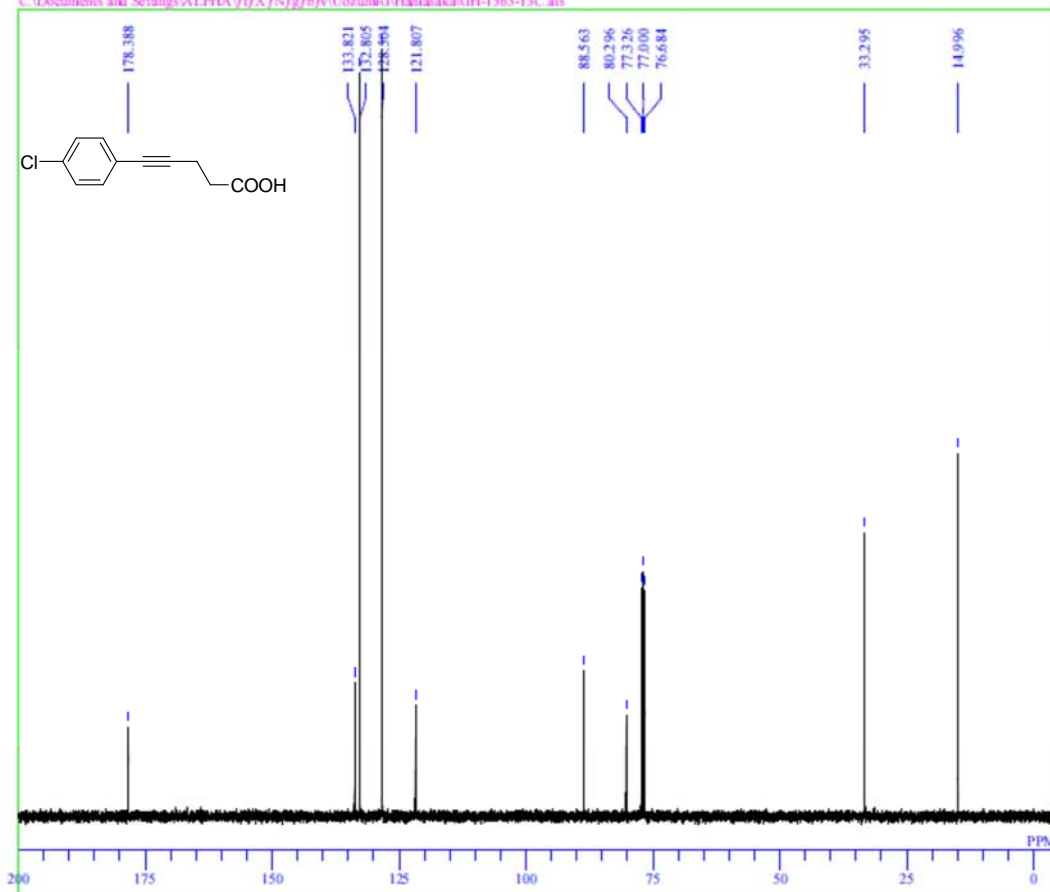

DFILE GH-1363-13C.als  
 COMNT GH-1363-13C  
 DATIM 2013-07-03 16:53:46  
 OBNUC 13C  
 EXMOD carbon.jxp  
 OBFREQ 99.55 MHz  
 OBSET 5.13 KHz  
 OBFIN 0.98 Hz  
 POINT 32767  
 FREQU 31250.00 Hz  
 SCANS 112  
 ACQTM 1.0486 sec  
 PD 2.0000 sec  
 PWI 3.42 usec  
 IRNUC 1H  
 CTEMP 19.6 c  
 SLVNT CDCL3  
 EXREF 77.00 ppm  
 BF 0.50 Hz  
 RGAIN 60

5-(2-methylphenyl)-4-pentynoic acid (**2j**)

GH-1259-wash-1H

C:\Documents and Settings\ALPHA\ff\X\N\g\fb\A\Uozumi\GH\Hamakaki\GH-1259-wash-1H.als

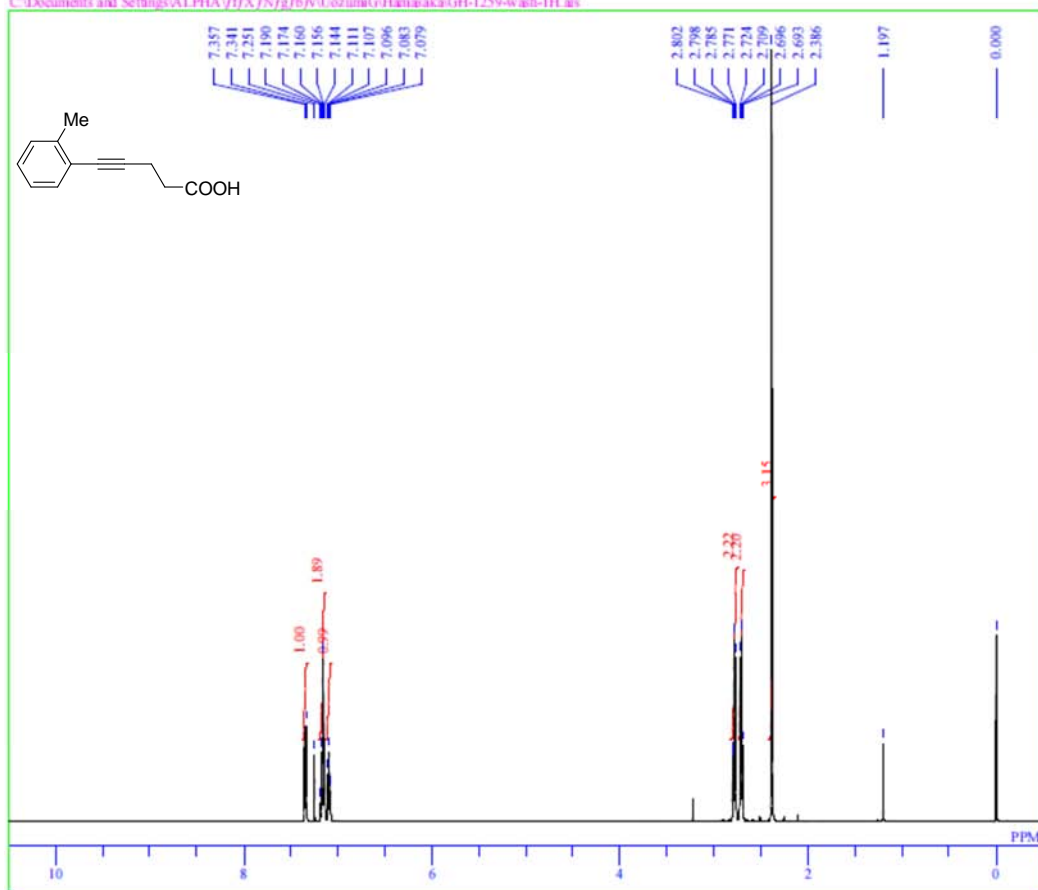

DFILE GH-1259-wash-1H.als  
 COMNT GH-1259-wash-1H  
 DATIM Mon Aug 20 16:18:46 2012  
 OBNUC 1H  
 EXMOD SINGL  
 OBFREQ 500.00 MHz  
 OBSSET 0.00 KHz  
 OBFIN 162410.00 Hz  
 POINT 16384  
 FREQU 10000.00 Hz  
 SCANS 16  
 ACQTM 1.6384 sec  
 PD 2.0000 sec  
 PWI 6.40 usec  
 IRNUC 1H  
 CTEMP 24.3 c  
 SLVNT CDCL3  
 EXREF 0.00 ppm  
 BF 0.00 Hz  
 RGAIN 16

GH-1259-wash-13C

C:\Documents and Settings\ALPHA\ff\X\N\g\fb\A\Uozumi\GH\Hamakaki\GH-1259-wash-13C.als

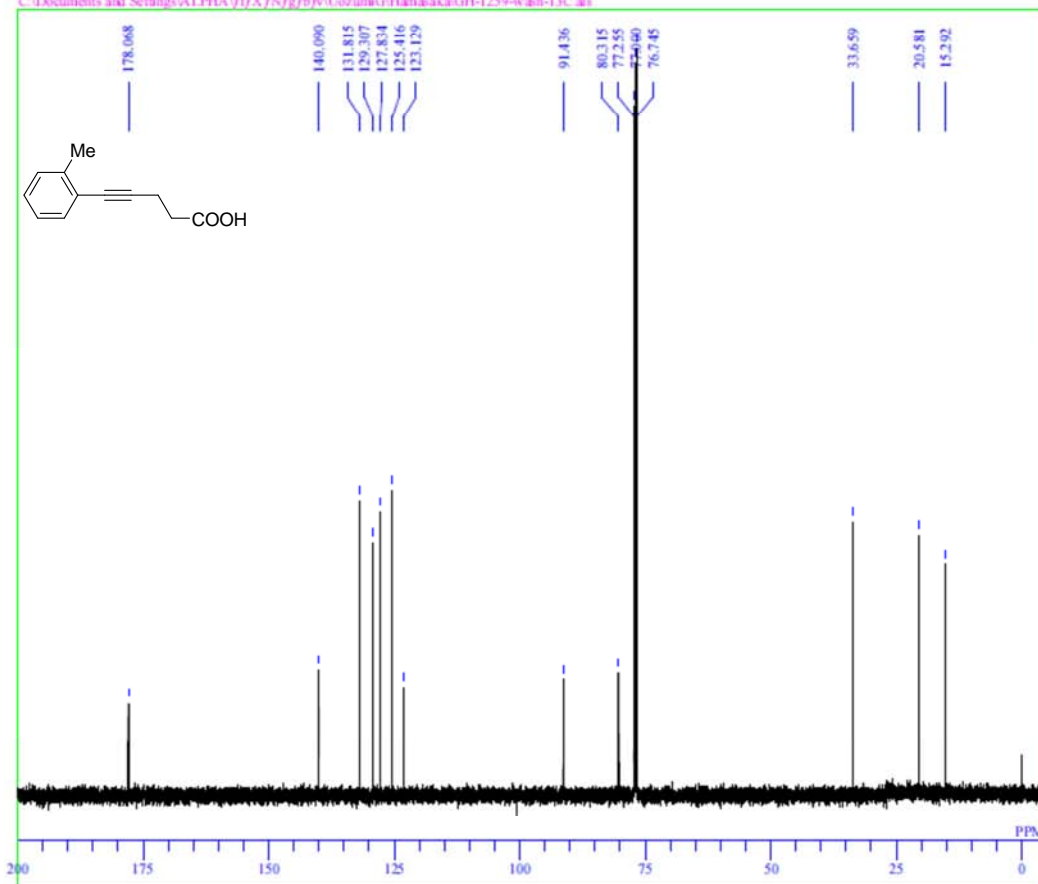

DFILE GH-1259-wash-13C.als  
 COMNT GH-1259-wash-13C  
 DATIM Mon Aug 20 16:48:13 2012  
 OBNUC 13C  
 EXMOD SINGL  
 OBFREQ 125.65 MHz  
 OBSSET 0.00 KHz  
 OBFIN 127958.00 Hz  
 POINT 32768  
 FREQU 33898.30 Hz  
 SCANS 63  
 ACQTM 0.9667 sec  
 PD 1.0000 sec  
 PWI 5.75 usec  
 IRNUC 13C  
 CTEMP 26.4 c  
 SLVNT CDCL3  
 EXREF 77.00 ppm  
 BF 0.50 Hz  
 RGAIN 26

5-(1-naphthyl)-4-pentynoic acid (**2k**)

GH-1499-1H

C:\Documents and Settings\ALPHA\ff\X\N/g/b/A/UozumiG\Hamasaki\GH-1499-1H.als

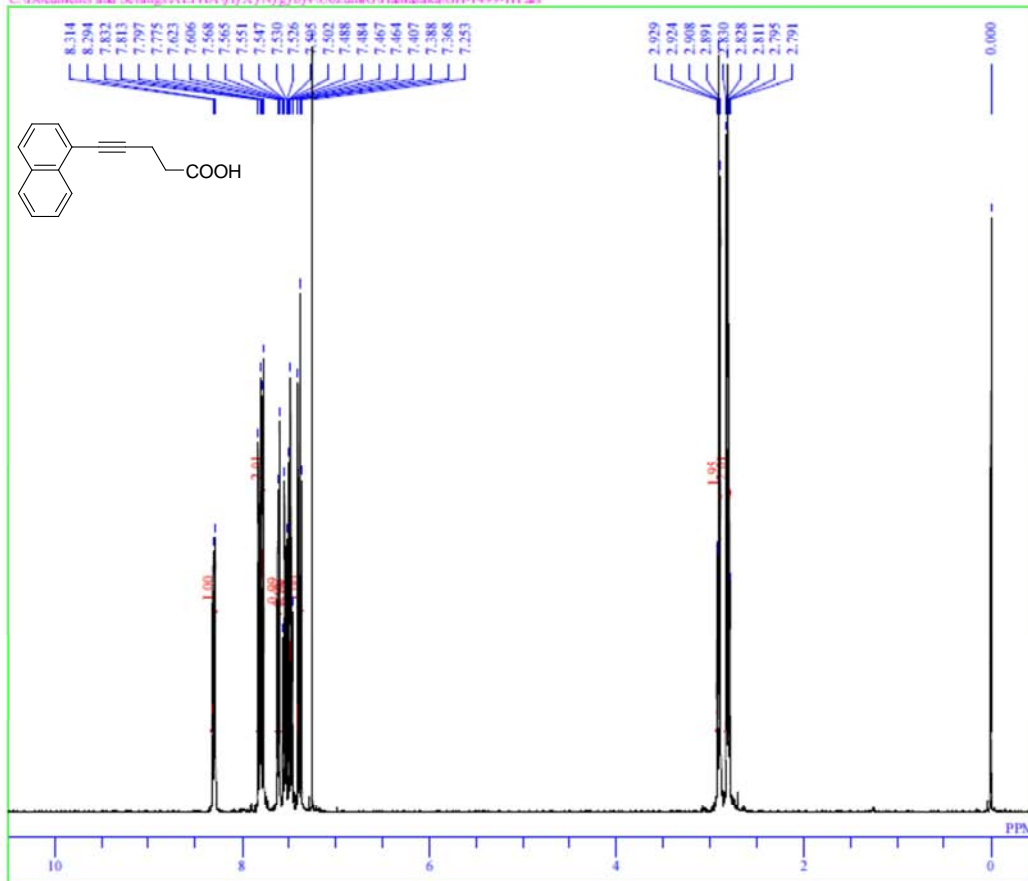

DFILE GH-1499-1H.als  
 COMNT GH-1499-1H  
 DATIM 2013-07-03 17:05:56  
 OBNUC 1H  
 EXMOD proton.jxp  
 OBFREQ 395.88 MHz  
 OBSET 6.28 KHz  
 OBFIN 0.87 Hz  
 POINT 16384  
 FREQU 7422.80 Hz  
 SCANS 8  
 ACQTM 2.2073 sec  
 PD 5.0000 sec  
 PW1 3.12 usec  
 IRNUC 1H  
 CTEMP 19.3 c  
 SLVNT CDCL3  
 EXREF 0.00 ppm  
 BF 0.00 Hz  
 RGAIN 38

GH-1499-13C

C:\Documents and Settings\ALPHA\ff\X\N/g/b/A/UozumiG\Hamasaki\GH-1499-13C.als

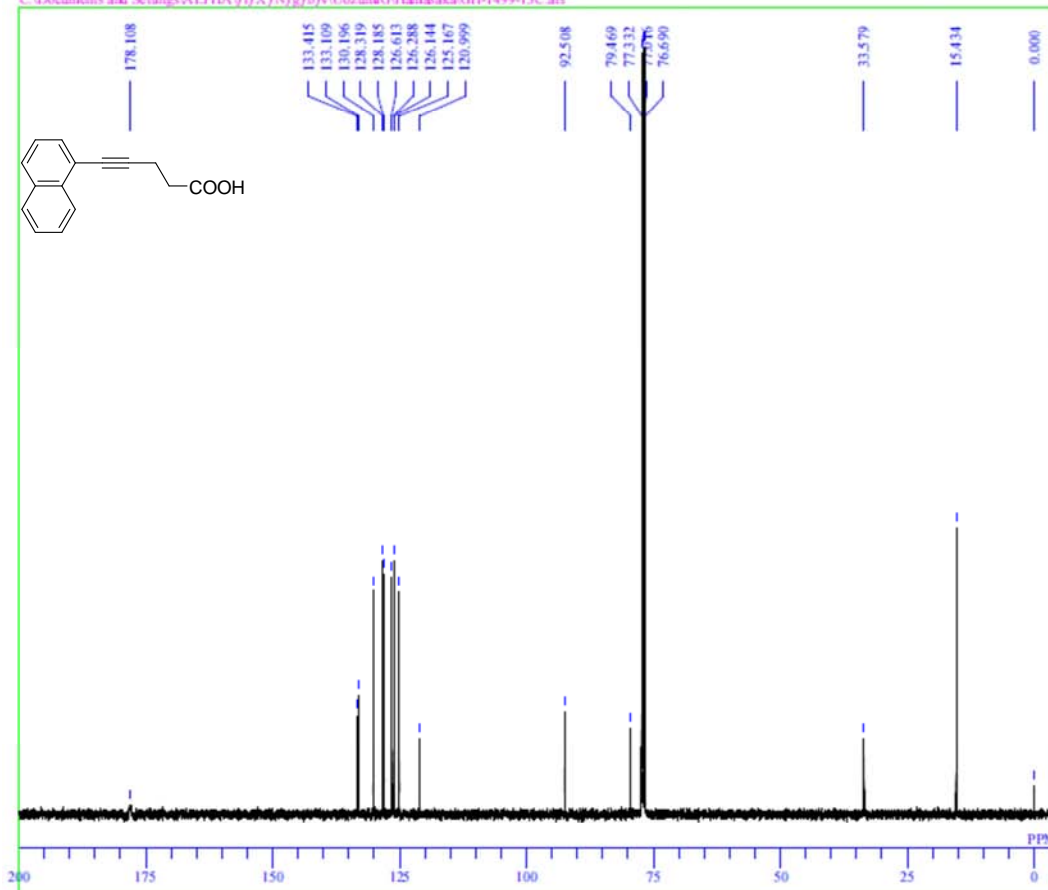

DFILE GH-1499-13C.als  
 COMNT GH-1499-13C  
 DATIM 2013-07-03 17:08:03  
 OBNUC 13C  
 EXMOD carbon.jxp  
 OBFREQ 99.55 MHz  
 OBSET 5.13 KHz  
 OBFIN 0.98 Hz  
 POINT 32767  
 FREQU 31250.00 Hz  
 SCANS 1174  
 ACQTM 1.0486 sec  
 PD 2.0000 sec  
 PW1 3.42 usec  
 IRNUC 1H  
 CTEMP 19.2 c  
 SLVNT CDCL3  
 EXREF 0.00 ppm  
 BF 1.00 Hz  
 RGAIN 60

5-(2-thienyl)-4-pentynoic acid (**21**)

GH-1496-1H

C:\Documents and Settings\ALPHA\ff\X\N\g\b\U\ozami\G\Hamasaki\GH-1496-1H.als

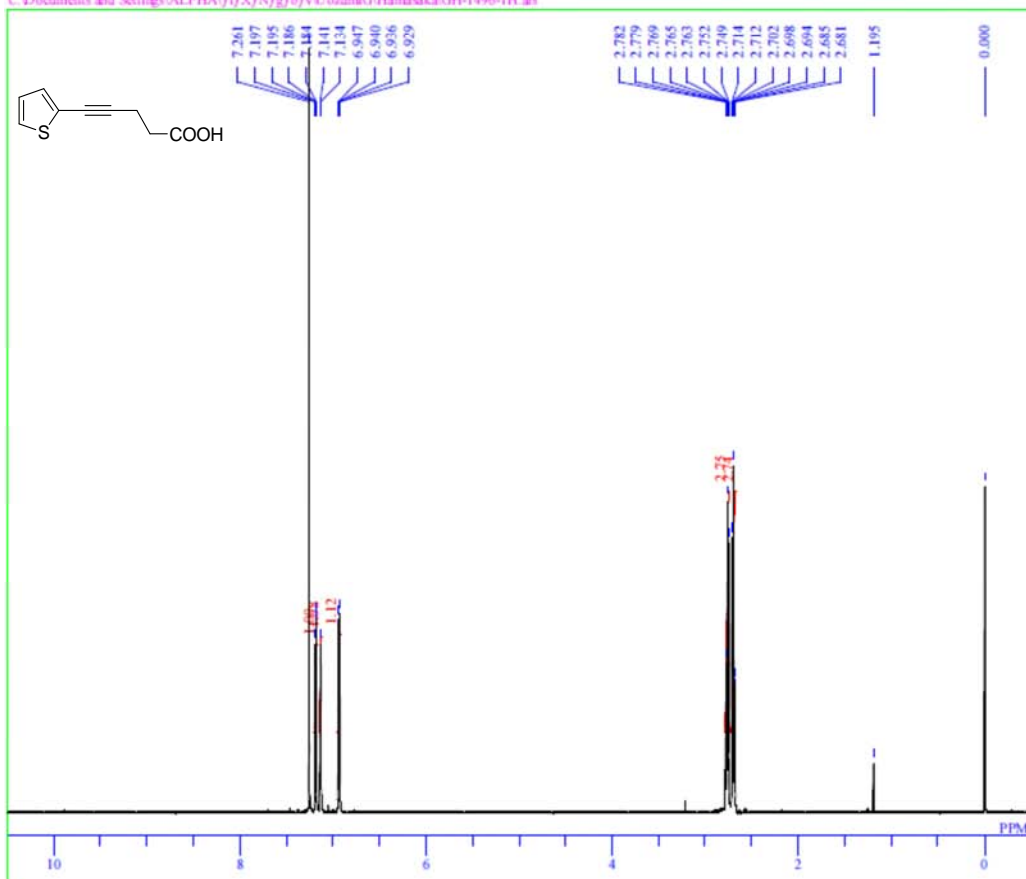

DFILE GH-1496-1H.als  
 COMNT GH-1496-1H  
 DATIM Thu Mar 07 21:18:32 2013  
 OBNUC 1H  
 EXMOD SINGL  
 OBFREQ 500.00 MHz  
 OBSET 0.00 KHz  
 OBFIN 162410.00 Hz  
 POINT 16384  
 FREQU 10000.00 Hz  
 SCANS 16  
 ACQTM 1.6384 sec  
 PD 2.0000 sec  
 PWI 6.40 usec  
 IRNUC 1H  
 CTEMP 21.9 c  
 SLVNT CDCL3  
 EXREF 0.00 ppm  
 BF 0.00 Hz  
 RGAIN 26

GH-1496-13C

C:\Documents and Settings\ALPHA\ff\X\N\g\b\U\ozami\G\Hamasaki\GH-1496-13C.als

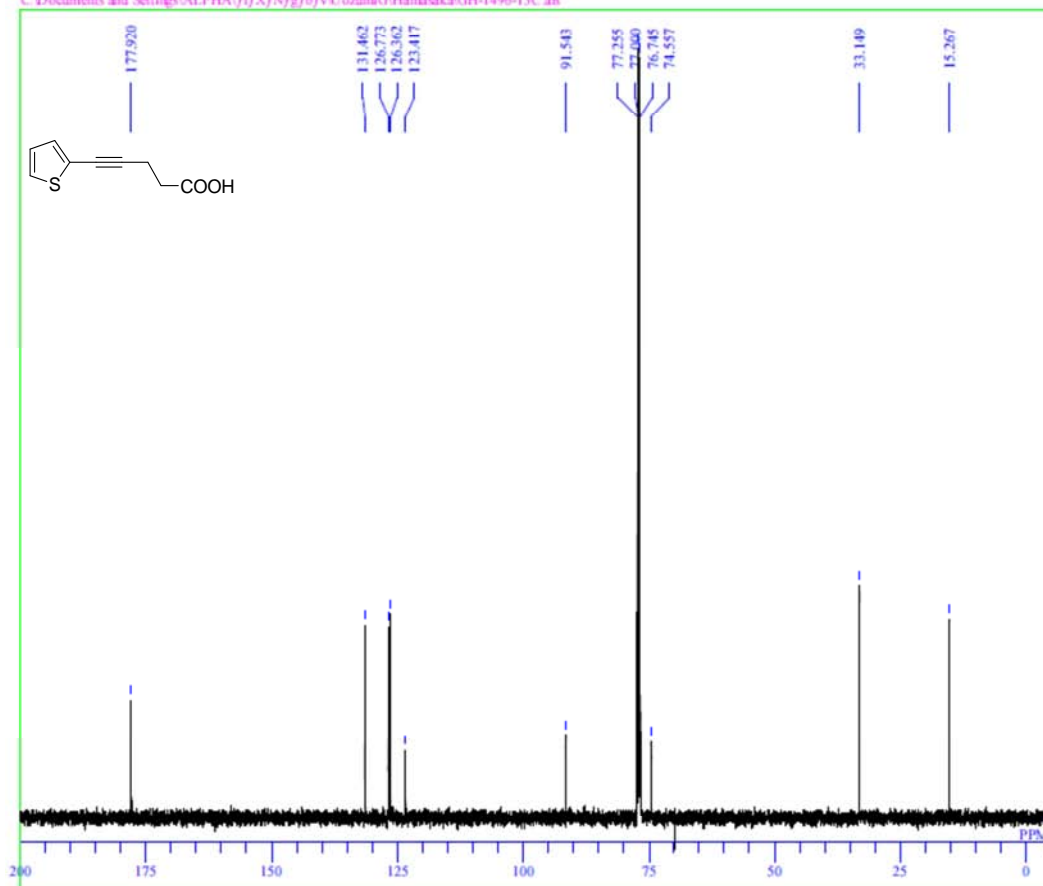

DFILE GH-1496-13C.als  
 COMNT GH-1496-13C  
 DATIM Mon Mar 11 14:31:58 2013  
 OBNUC 13C  
 EXMOD SINGL  
 OBFREQ 125.65 MHz  
 OBSET 0.00 KHz  
 OBFIN 127958.00 Hz  
 POINT 32768  
 FREQU 33898.30 Hz  
 SCANS 1101  
 ACQTM 0.9667 sec  
 PD 1.0000 sec  
 PWI 5.75 usec  
 IRNUC 1H  
 CTEMP 23.8 c  
 SLVNT CDCL3  
 EXREF 77.00 ppm  
 BF 1.50 Hz  
 RGAIN 26

(Z)- $\gamma$ -(4-Trifluoromethylbenzylidene)- $\gamma$ -butyrolactone (**3a**)

F3CC6H4-g-lactone-1H

C:\Documents and Settings\ALPHA\ff\X\N\g\h\y\U\ozumi\G\Hamasaki\F3CC6H4-g-lactone-1H.als

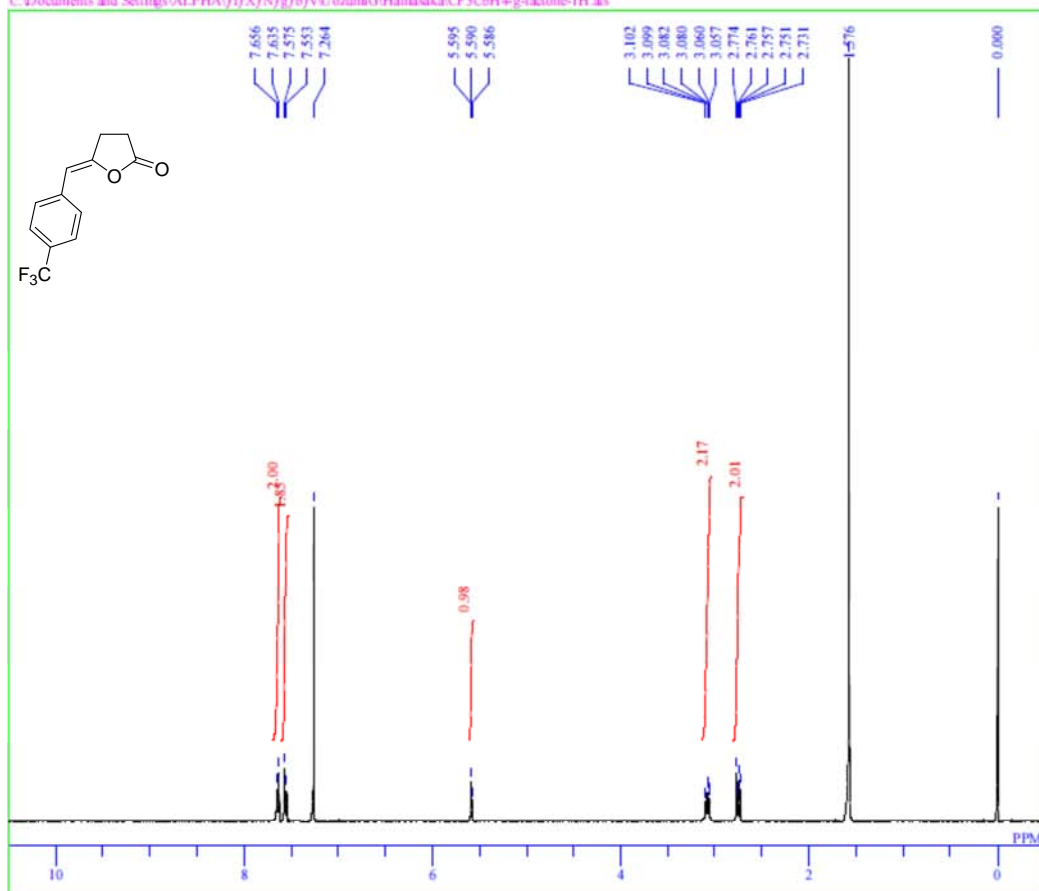

DFILE F3CC6H4-g-lactone-1H.als  
COMNT F3CC6H4-g-lactone-1H  
DATIM 2013-08-01 12:03:42  
OBNUC 1H  
EXMOD proton.jsp  
OBFRQ 395.88 MHz  
OBSET 6.28 KHz  
OBFIN 0.87 Hz  
POINT 16384  
FREQU 7422.80 Hz  
SCANS 8  
ACQTM 2.2073 sec  
PD 5.0000 sec  
PWI 3.12 usec  
IRNUC 1H  
CTEMP 20.7 c  
SLVNT CDCL3  
EXREF 0.00 ppm  
BF 0.30 Hz  
RGAIN 46

F3CC6H4-g-lactone-13C

C:\Documents and Settings\ALPHA\ff\X\N\g\h\y\U\ozumi\G\Hamasaki\F3CC6H4-g-lactone-13C.als

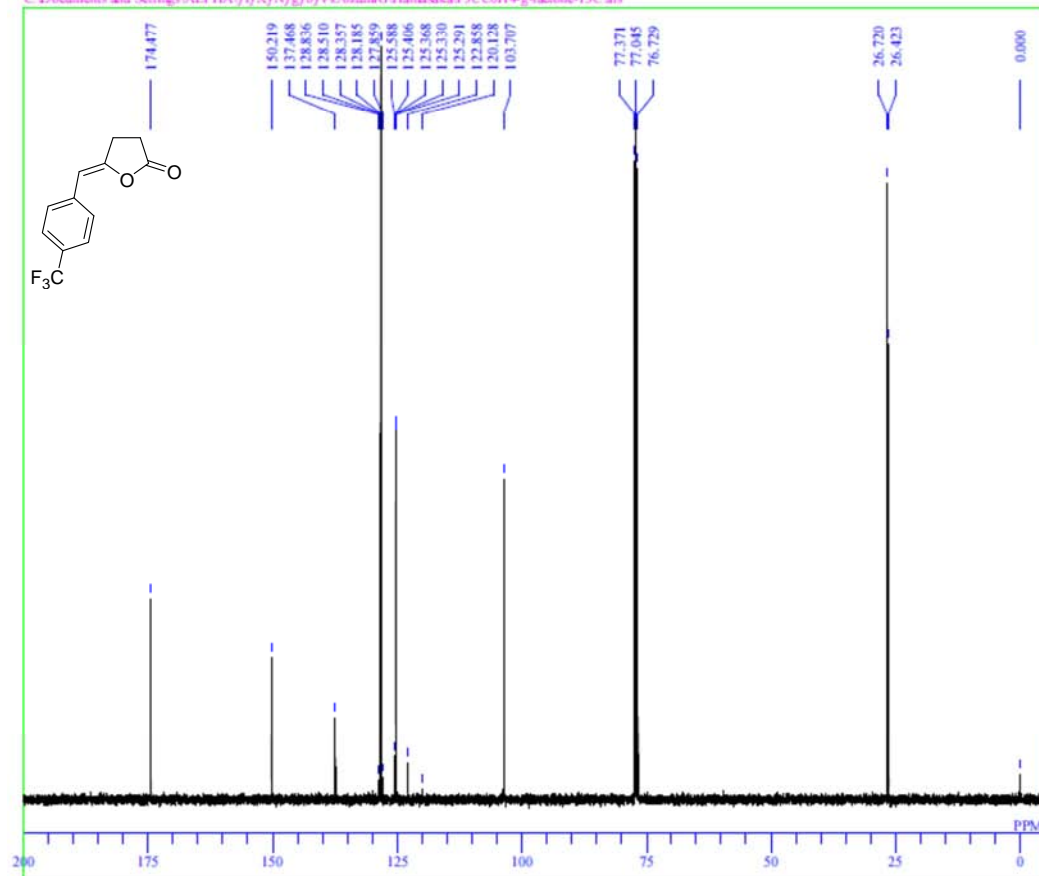

DFILE F3CC6H4-g-lactone-13C.als  
COMNT F3CC6H4-g-lactone-13C  
DATIM 2013-07-08 18:11:37  
OBNUC 13C  
EXMOD carbon.jsp  
OBFRQ 99.55 MHz  
OBSET 5.13 KHz  
OBFIN 0.98 Hz  
POINT 32767  
FREQU 31250.00 Hz  
SCANS 806  
ACQTM 1.0486 sec  
PD 2.0000 sec  
PWI 3.42 usec  
IRNUC 1H  
CTEMP 21.9 c  
SLVNT CDCL3  
EXREF 0.00 ppm  
BF 0.50 Hz  
RGAIN 60

(Z)- $\gamma$ -Phenylbenzylidene- $\gamma$ -butyrolactone (**3b**)

Ph-g-lactone-1H

C:\Documents and Settings\ALPHA\ff\X\N\g\fb\Uozumi\G\Hamazaki\Ph-g-lactone-1H-2.als

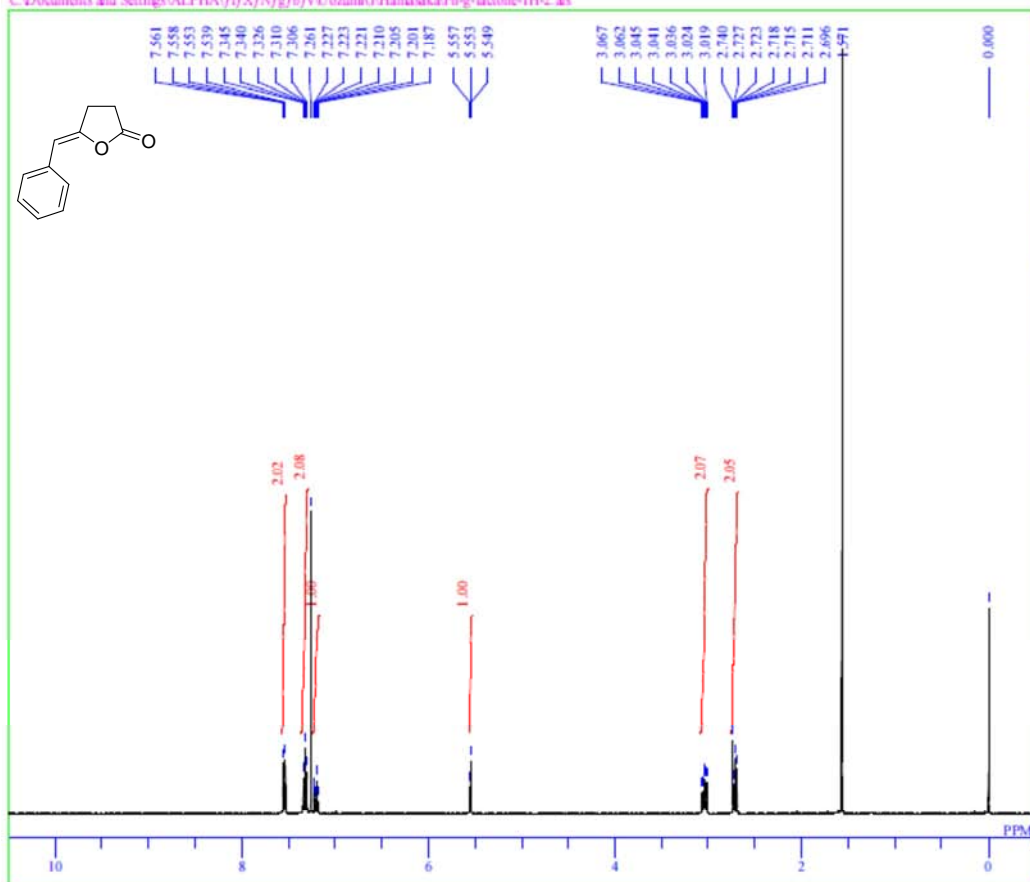

DFILE Ph-g-lactone-1H-2.als  
COMNT Ph-g-lactone-1H  
DATIM 2013-08-01 16:20:34  
OBNUC 1H  
EXMOD proton.jxp  
OBFRQ 395.88 MHz  
OBSET 6.28 KHz  
OBFIN 0.87 Hz  
POINT 16384  
FREQU 7422.80 Hz  
SCANS 8  
ACQTM 2.2073 sec  
PD 5.0000 sec  
PWI 3.12 usec  
IRNUC 1H  
CTEMP 21.9 c  
SLVNT CDCL3  
EXREF 0.00 ppm  
BF 0.00 Hz  
RGAIN 46

Ph-g-lactone-13C

C:\Documents and Settings\ALPHA\ff\X\N\g\fb\Uozumi\G\Hamazaki\Ph-g-lactone-13C.als

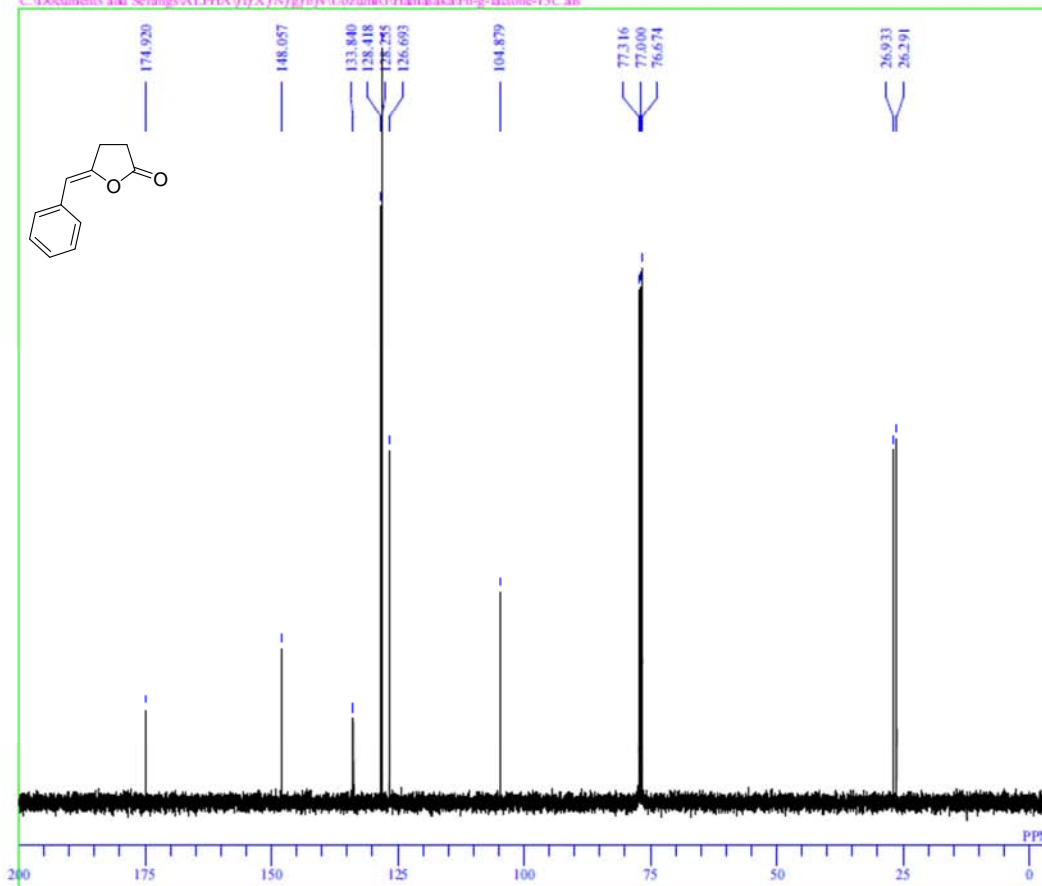

DFILE Ph-g-lactone-13C.als  
COMNT Ph-g-lactone-13C  
DATIM 2013-07-09 11:13:56  
OBNUC 13C  
EXMOD carbon.jxp  
OBFRQ 99.55 MHz  
OBSET 5.13 KHz  
OBFIN 0.98 Hz  
POINT 32767  
FREQU 31250.00 Hz  
SCANS 163  
ACQTM 1.0486 sec  
PD 2.0000 sec  
PWI 3.42 usec  
IRNUC 1H  
CTEMP 21.4 c  
SLVNT CDCL3  
EXREF 77.00 ppm  
BF 0.50 Hz  
RGAIN 60

(Z)- $\gamma$ -(4-Methylbenzylidene)- $\gamma$ -butyrolactone (**3c**)

4-MeC6H4-g-lactone-1H

C:\Documents and Settings\ALPHA\ff\X\N\g\b\U\ozumi\G\Hamazaki\4-MeC6H4-g-lactone-13C.als

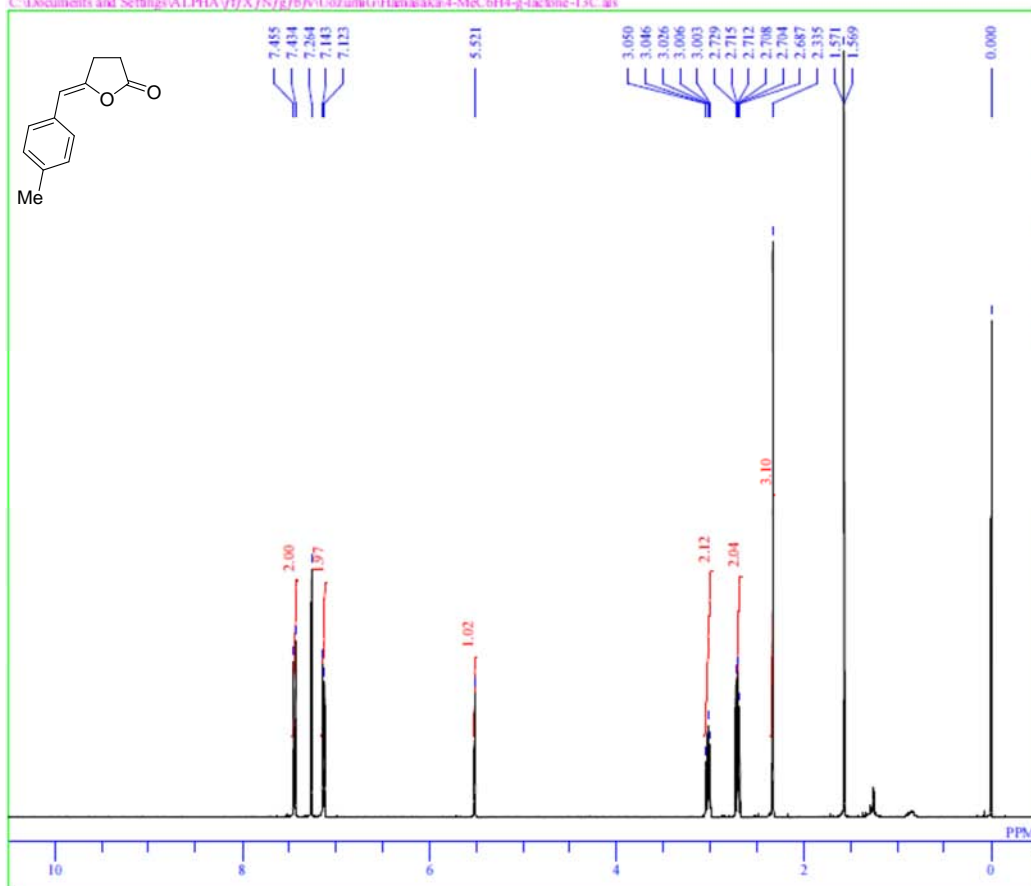

DFILE 4-MeC6H4-g-lactone-13C.als  
COMNT 4-MeC6H4-g-lactone-1H  
DATIM 2013-07-09 22:06:38  
OBNUC 1H  
EXMOD proton.jxp  
OBFREQ 395.88 MHz  
OBSET 6.28 KHz  
OBFIN 0.87 Hz  
POINT 16384  
FREQU 7422.80 Hz  
SCANS 8  
ACQTM 2.2073 sec  
PD 5.0000 sec  
PWI 3.12 usec  
IRNUC 1H  
CTEMP 21.2 c  
SLVNT CDCL3  
EXREF 0.00 ppm  
BF 0.00 Hz  
RGAIN 44

4-MeC6H4-g-lactone-13C

C:\Documents and Settings\ALPHA\ff\X\N\g\b\U\ozumi\G\Hamazaki\4-MeC6H4-g-lactone-13C.als

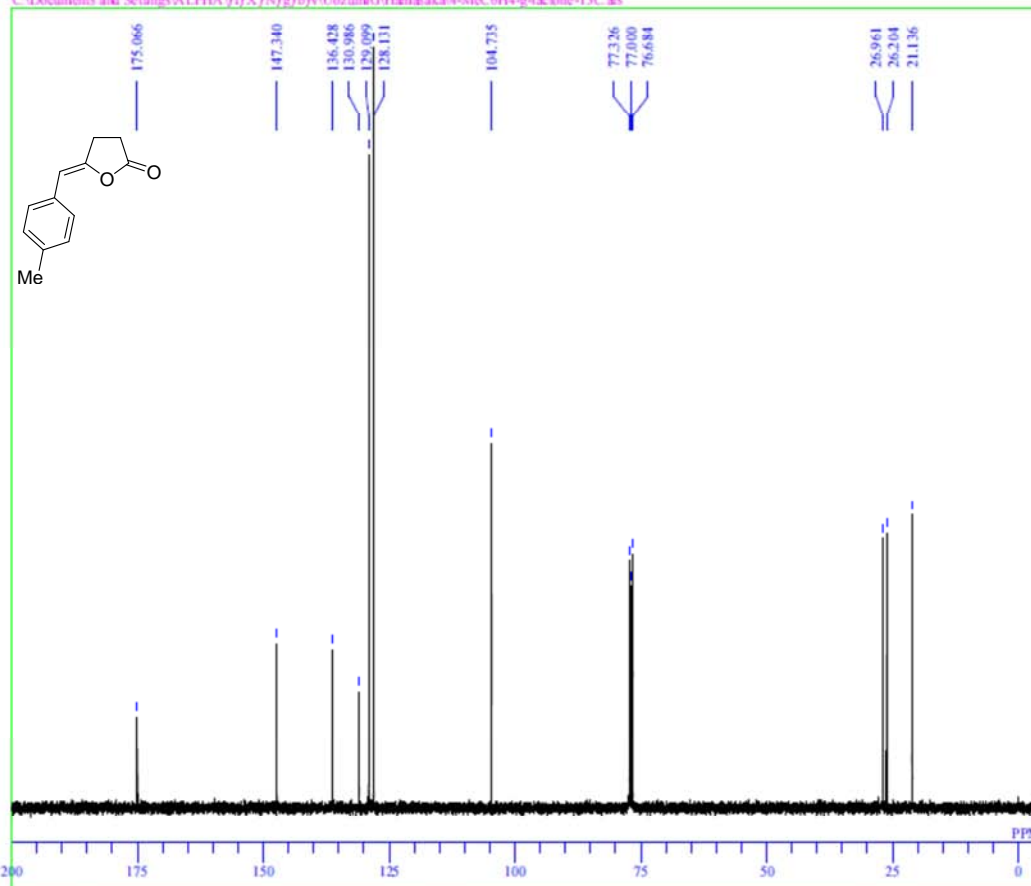

DFILE 4-MeC6H4-g-lactone-13C.als  
COMNT 4-MeC6H4-g-lactone-13C  
DATIM 2013-07-17 23:27:08  
OBNUC 13C  
EXMOD carbon.jxp  
OBFREQ 99.55 MHz  
OBSET 5.13 KHz  
OBFIN 0.98 Hz  
POINT 26214  
FREQU 25000.00 Hz  
SCANS 136  
ACQTM 1.0486 sec  
PD 2.0000 sec  
PWI 3.42 usec  
IRNUC 1H  
CTEMP 19.9 c  
SLVNT CDCL3  
EXREF 77.00 ppm  
BF 0.50 Hz  
RGAIN 60

(Z)- $\gamma$ -(4-Methoxybenzylidene)- $\gamma$ -butyrolactone (**3d**)

MeOC6H4-g-lactone

C:\Documents and Settings\ALPHA\ffx\N/g/b/b/Uozumi\G\Hamazaki\MeOC6H4-g-lactone-1H.als

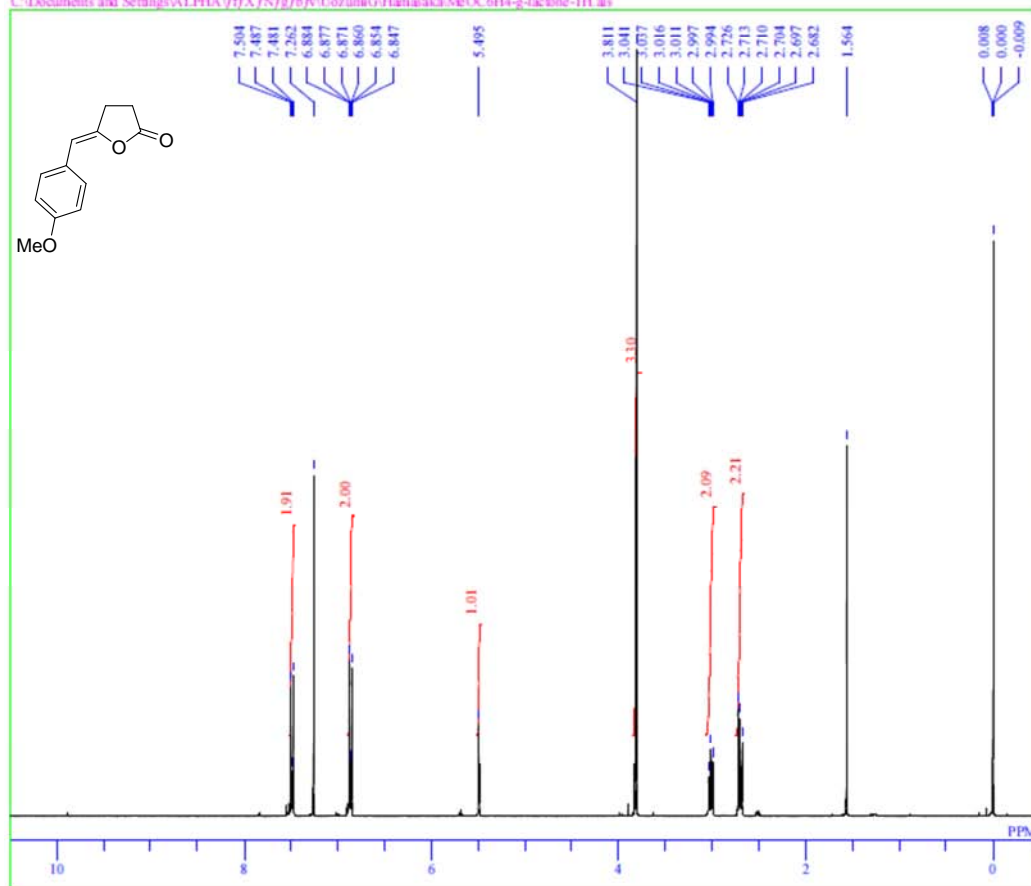

DFILE MeOC6H4-g-lactone-1H.als  
COMNT MeOC6H4-g-lactone  
DATIM 2013-07-06 19:41:56  
OBNUC 1H  
EXMOD proton.jxp  
OBFREQ 395.88 MHz  
OBSET 6.28 KHz  
OBFIN 0.87 Hz  
POINT 16384  
FREQU 7422.80 Hz  
SCANS 8  
ACQTM 2.2073 sec  
PD 5.0000 sec  
PWI 3.12 usec  
IRNUC 1H  
CTEMP 19.8 c  
SLVNT CDCl3  
XREF 0.00 ppm  
BF 0.00 Hz  
RGAIN 44

MeOC6H4-g-lactone-13C

C:\Documents and Settings\ALPHA\ffx\N/g/b/b/Uozumi\G\Hamazaki\MeOC6H4-g-lactone-13C.als

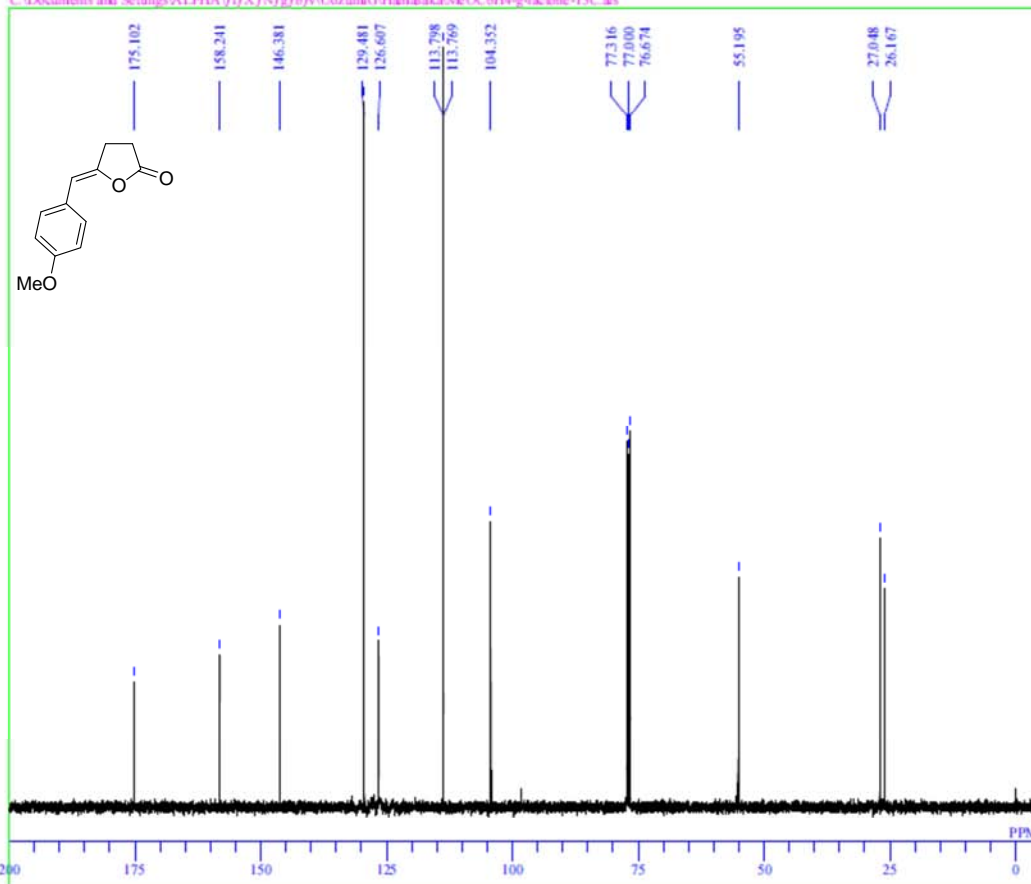

DFILE MeOC6H4-g-lactone-13C.als  
COMNT MeOC6H4-g-lactone-13C  
DATIM 2013-07-06 20:27:13  
OBNUC 13C  
EXMOD carbon.jxp  
OBFREQ 99.55 MHz  
OBSET 5.13 KHz  
OBFIN 0.98 Hz  
POINT 32767  
FREQU 31250.00 Hz  
SCANS 273  
ACQTM 1.0486 sec  
PD 2.0000 sec  
PWI 3.42 usec  
IRNUC 13C  
CTEMP 19.7 c  
SLVNT CDCl3  
XREF 77.00 ppm  
BF 0.50 Hz  
RGAIN 60



(Z)- $\gamma$ -(4-*tert*-Butylbenzylidene)- $\gamma$ -butyrolactone (**3e**)

4-tBuC6H4-g-lactone-1H

C:\Documents and Settings\ALPHA\ff\X\N/g/b/v/UozumiG\Hanasaka\4-tBuC6H4-g-lactone-1H-3.als

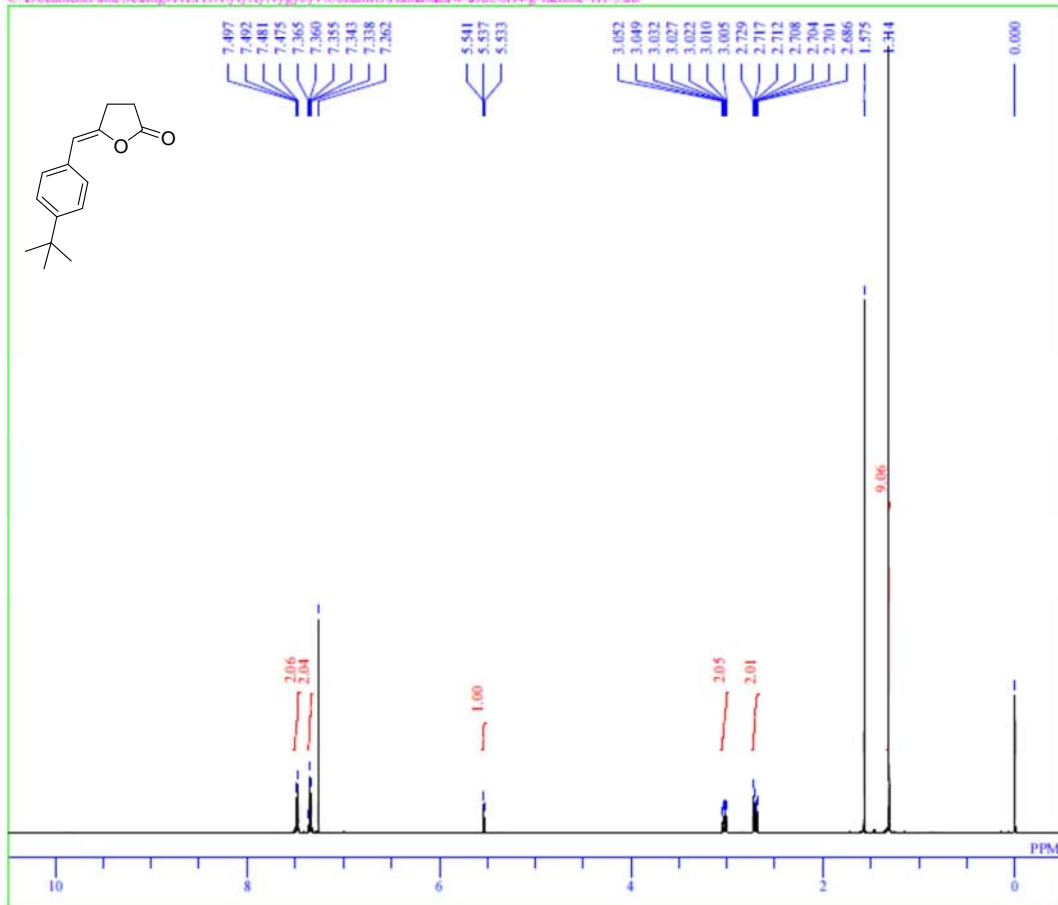

DFILE 4-tBuC6H4-g-lactone-1H-3.als  
COMNT 4-tBuC6H4-g-lactone-1H  
DATIM 2013-08-03 15:44:31  
1H  
EXMOD proton.jsp  
OBFREQ 395.88 MHz  
OBSET 6.28 KHz  
OBFIN 0.87 Hz  
POINT 16384  
FREQU 7422.80 Hz  
SCANS 8  
ACQTM 2.2073 sec  
PD 5.0000 sec  
PW1 3.12 usec  
IRNUC 1H  
CTEMP 20.9 c  
SLVNT CDCL3  
EXREF 0.00 ppm  
BF 0.00 Hz  
RGAIN 46

tBuC6H4-g-lactone-13C

C:\Documents and Settings\ALPHA\ff\X\N/g/b/v/UozumiG\Hanasaka\4-tBuC6H4-g-lactone-13C.als

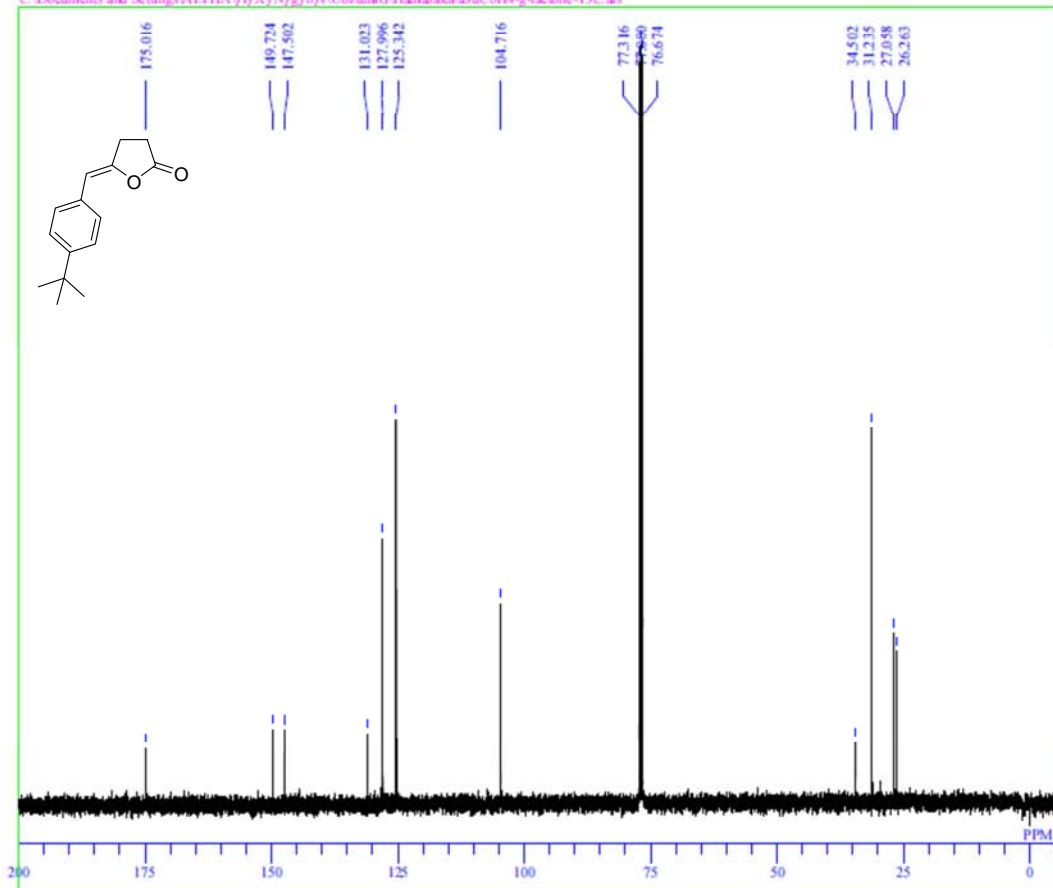

DFILE tBuC6H4-g-lactone-13C.als  
COMNT tBuC6H4-g-lactone-13C  
DATIM 2013-07-09 10:31:25  
13C  
EXMOD carbon.jsp  
OBFREQ 99.55 MHz  
OBSET 5.13 KHz  
OBFIN 0.98 Hz  
POINT 32767  
FREQU 31250.00 Hz  
SCANS 315  
ACQTM 1.0486 sec  
PD 2.0000 sec  
PW1 3.42 usec  
IRNUC 1H  
CTEMP 21.3 c  
SLVNT CDCL3  
EXREF 77.00 ppm  
BF 0.50 Hz  
RGAIN 60

(Z)- $\gamma$ -(4-Phenylbenzylidene)- $\gamma$ -butyrolactone (**3f**)

PhC6H4-g-lactone-1H

C:\Documents and Settings\ALPHA\ff\X\N\g\b\Uozumi\G\Hamana\PhC6H4-g-lactone-1H.als

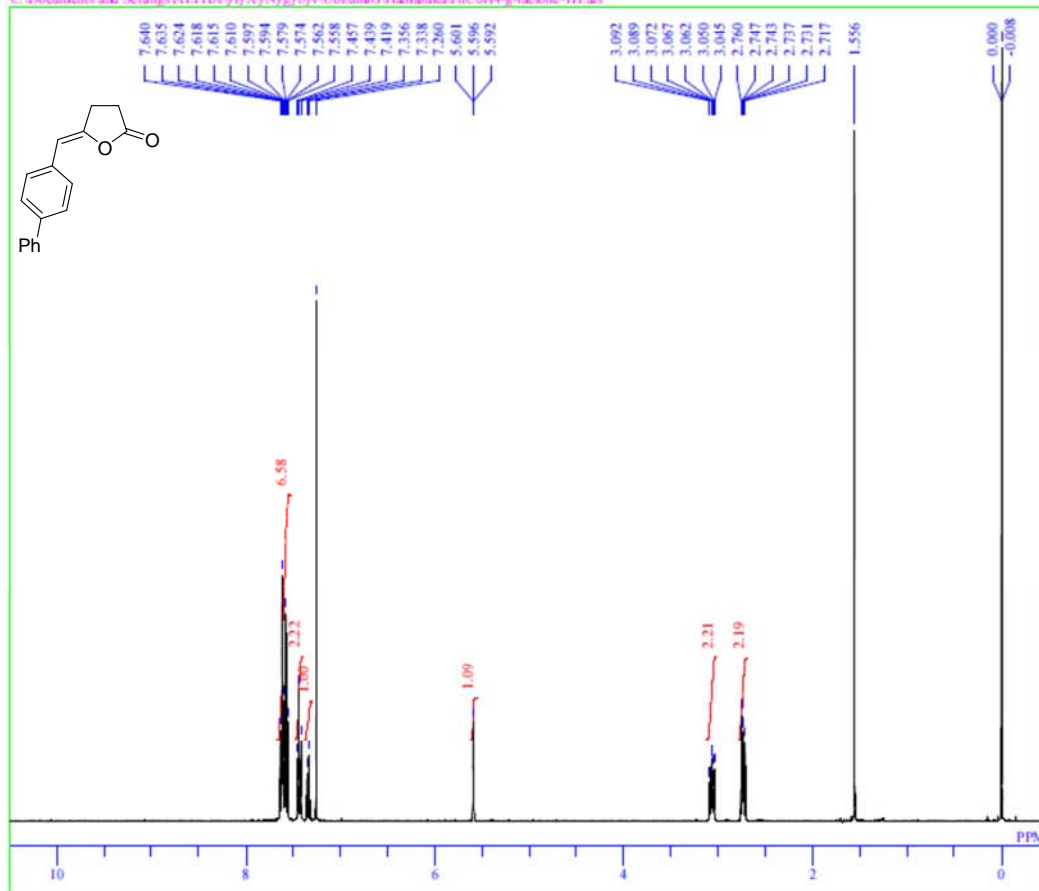

DFILE PhC6H4-g-lactone-1H.als  
COMNT PhC6H4-g-lactone-1H  
DATIM 2013-07-09 21:46:11  
OBNUC 1H  
EXMOD proton.jxp  
OBFREQ 395.88 MHz  
OBSET 6.28 KHz  
OBFIN 0.87 Hz  
POINT 16384  
FREQU 7422.80 Hz  
SCANS 8  
ACQTM 2.2073 sec  
PD 5.0000 sec  
PWI 3.12 usec  
IRNUC 1H  
CTEMP 21.2 c  
SLVNT CDCl3  
EXREF 0.00 ppm  
BF 0.00 Hz  
RGAIN 44

PhC6H4-g-lactone-13C

C:\Documents and Settings\ALPHA\ff\X\N\g\b\Uozumi\G\Hamana\PhC6H4-g-lactone-13C.als

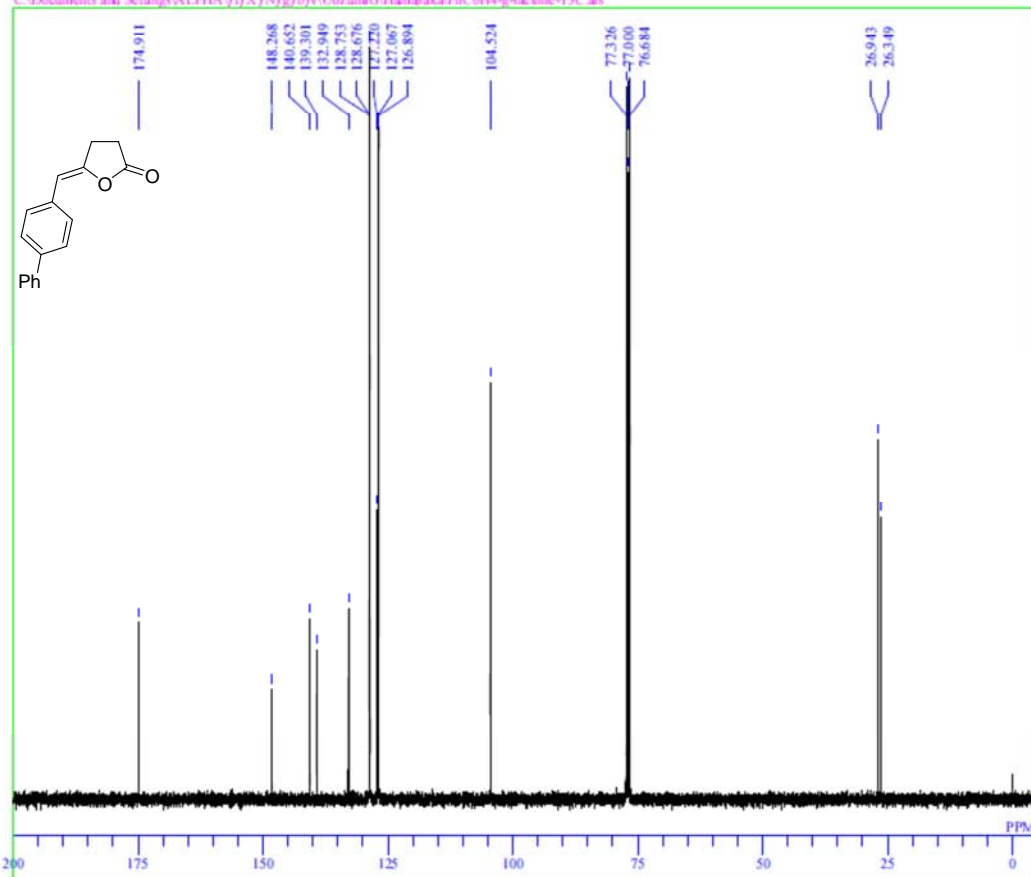

DFILE PhC6H4-g-lactone-13C.als  
COMNT PhC6H4-g-lactone-13C  
DATIM 2013-07-09 22:26:07  
OBNUC 13C  
EXMOD carbon.jxp  
OBFREQ 99.55 MHz  
OBSET 5.13 KHz  
OBFIN 0.98 Hz  
POINT 32767  
FREQU 31250.00 Hz  
SCANS 668  
ACQTM 1.0486 sec  
PD 2.0000 sec  
PWI 3.42 usec  
IRNUC 13C  
CTEMP 21.0 c  
SLVNT CDCl3  
EXREF 77.00 ppm  
BF 0.50 Hz  
RGAIN 60

(Z)- $\gamma$ -(4-Nitrobenzylidene)- $\gamma$ -butyrolactone (**3g**)

4-O2NC6H4-g-lactone-1H

C:\Documents and Settings\ALPHA\ff\X\N\g\b\U\ozumi\G\Hamazaka\4-O2NC6H4-g-lactone-1H-3.als

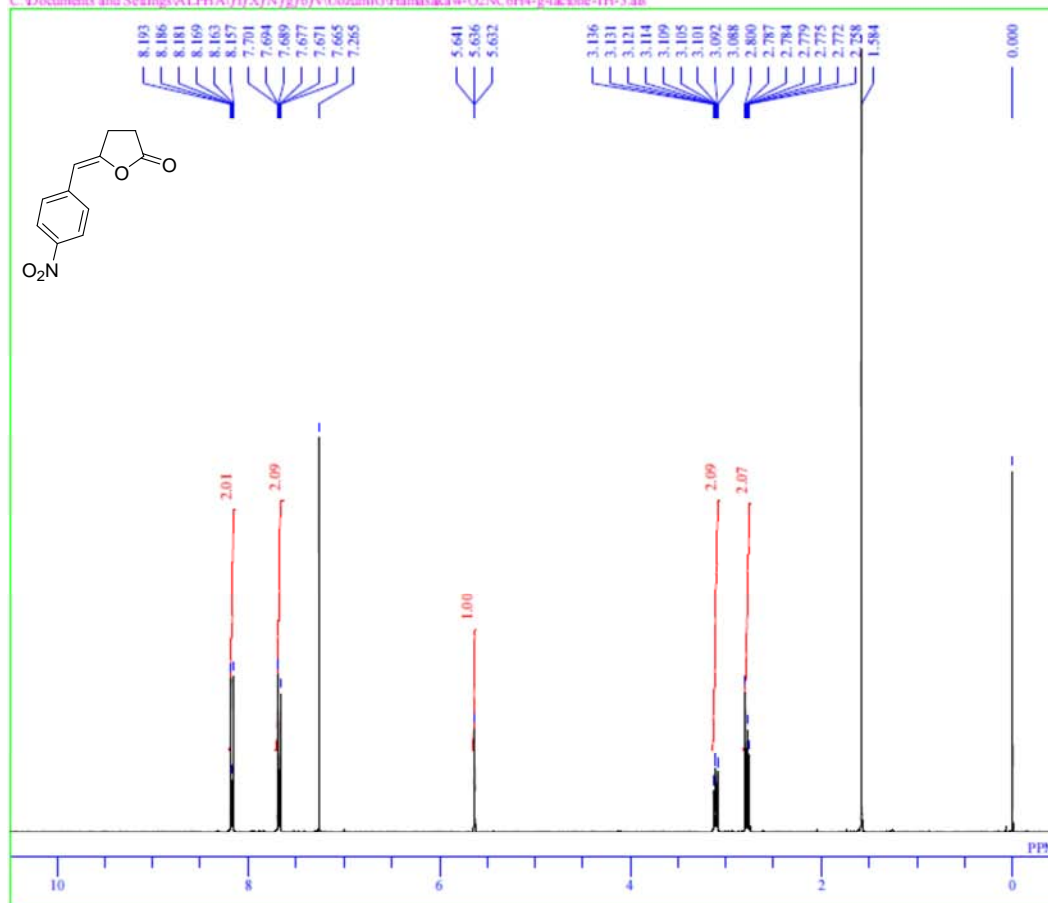

DFILE 4-O2NC6H4-g-lactone-1H-3.als  
COMNT 4-O2NC6H4-g-lactone-1H  
DATIM 2013-08-03 15:31:55  
OBNUC 1H  
EXMOD proton.jpg  
OBFREQ 395.88 MHz  
OBSET 6.28 KHz  
OBFIN 0.87 Hz  
POINT 16384  
FREQU 7422.80 Hz  
SCANS 8  
ACQTM 2.2073 sec  
PD 5.0000 sec  
PW1 3.12 usec  
IRNUC 1H  
CTEMP 20.9 c  
SLVNT CDCL3  
EXREF 0.00 ppm  
BF 0.00 Hz  
RGAIN 46

GH-1319-13C

C:\Documents and Settings\ALPHA\ff\X\N\g\b\U\ozumi\G\Hamazaka\GH-1319-13C.als

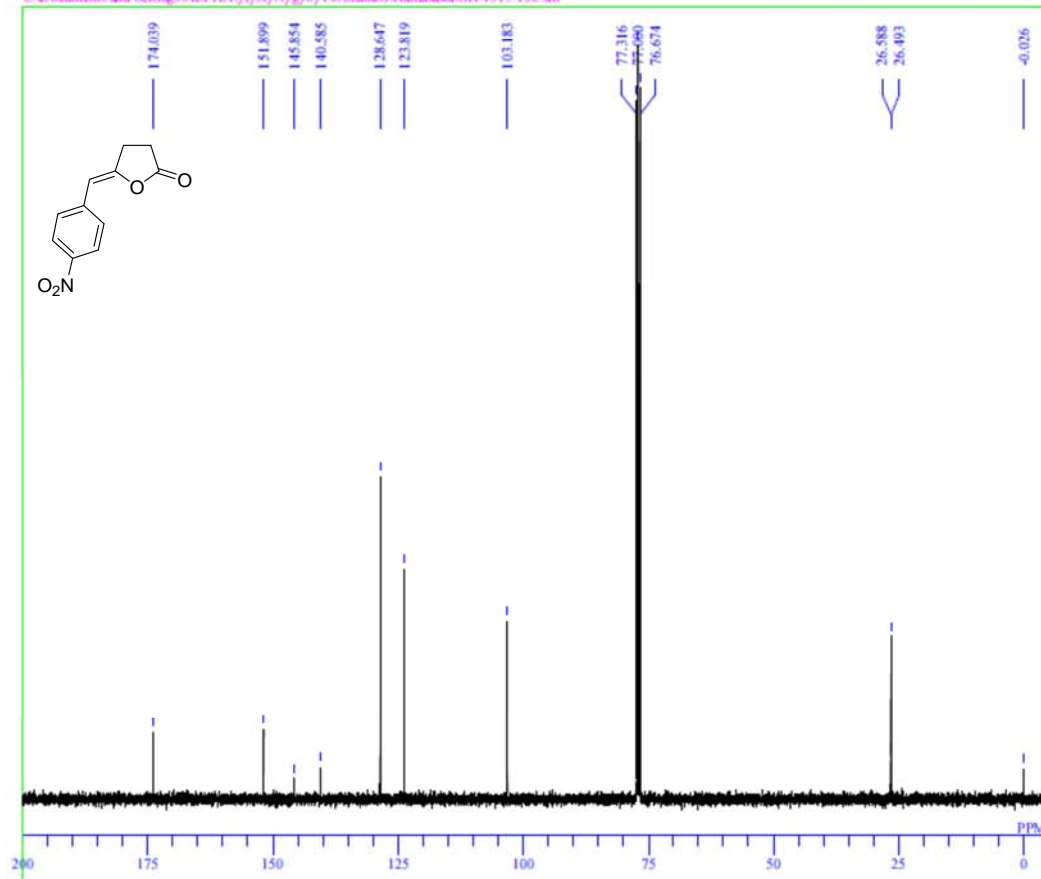

DFILE GH-1319-13C.als  
COMNT GH-1319-13C  
DATIM 2013-07-05 22:44:58  
OBNUC 13C  
EXMOD carbon.jpg  
OBFREQ 99.55 MHz  
OBSET 5.13 KHz  
OBFIN 0.98 Hz  
POINT 32767  
FREQU 31250.00 Hz  
SCANS 612  
ACQTM 1.0486 sec  
PD 2.0000 sec  
PW1 3.42 usec  
IRNUC 1H  
CTEMP 20.5 c  
SLVNT CDCL3  
EXREF 77.00 ppm  
BF 0.50 Hz  
RGAIN 60

(Z)- $\gamma$ -(4-Fluorobenzylidene)- $\gamma$ -butyrolactone (**3h**)

FC6H4-g-lactone

C:\Documents and Settings\ALPHA\ff\X\N\g\b\A\Uozumi\G\Hanagaki\FC6H4-g-lactone-1H.als

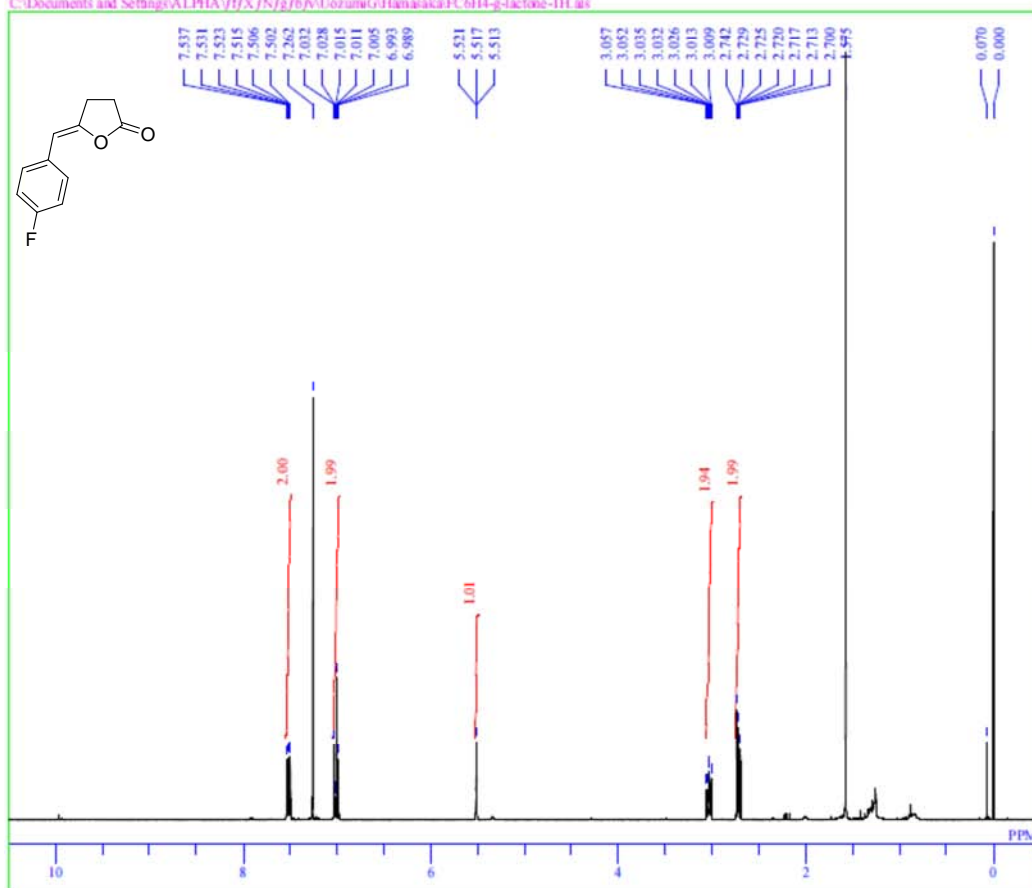

DFILE FC6H4-g-lactone-1H.als  
COMNT FC6H4-g-lactone  
DATIM 2013-07-08 14:01:44  
OBNUC 1H  
EXMOD proton.jsp  
OBFREQ 395.88 MHz  
OBSET 6.28 kHz  
OBFIN 0.87 Hz  
POINT 16384  
FREQU 7422.80 Hz  
SCANS 8  
ACQTM 2.2073 sec  
PD 5.0000 sec  
PW1 3.12 usec  
IRNUC 1H  
CTEMP 22.3 c  
SLVNT CDCL3  
EXREF 0.00 ppm  
BF 0.00 Hz  
RGAIN 46

4-FC6H4-g-lactone-13C

C:\Documents and Settings\ALPHA\ff\X\N\g\b\A\Uozumi\G\Hanagaki\4-FC6H4-g-lactone-13C.als

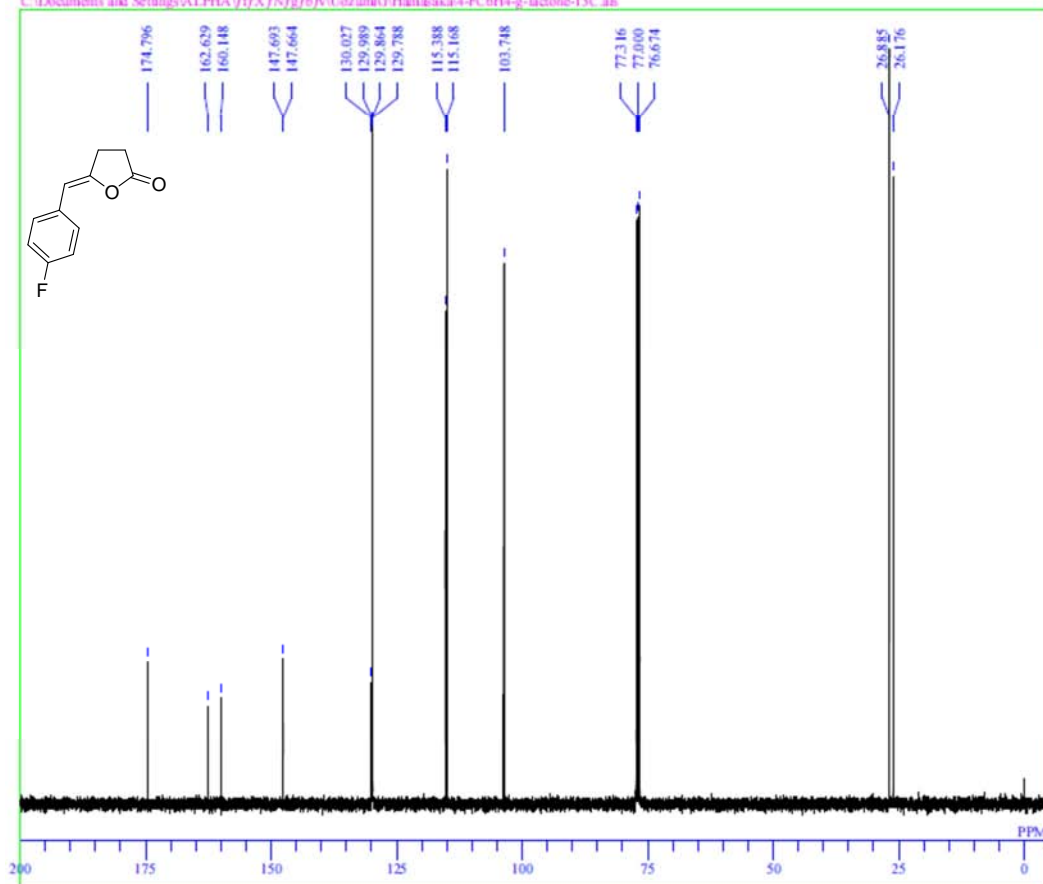

DFILE 4-FC6H4-g-lactone-13C.als  
COMNT 4-FC6H4-g-lactone-13C  
DATIM 2013-07-17 19:05:31  
OBNUC 13C  
EXMOD carbon.jsp  
OBFREQ 99.55 MHz  
OBSET 5.13 kHz  
OBFIN 0.98 Hz  
POINT 32767  
FREQU 31250.00 Hz  
SCANS 451  
ACQTM 1.0486 sec  
PD 2.0000 sec  
PW1 3.42 usec  
IRNUC 13C  
CTEMP 20.2 c  
SLVNT CDCL3  
EXREF 77.00 ppm  
BF 0.50 Hz  
RGAIN 60

(Z)- $\gamma$ -(4-Chlorobenzylidene)- $\gamma$ -butyrolactone (**3i**)

GH-1433-1H

C:\Documents and Settings\ALPHA\ffX\N/g/b/v/UozumiGHamasaki\GH-1433-1Hre2.als

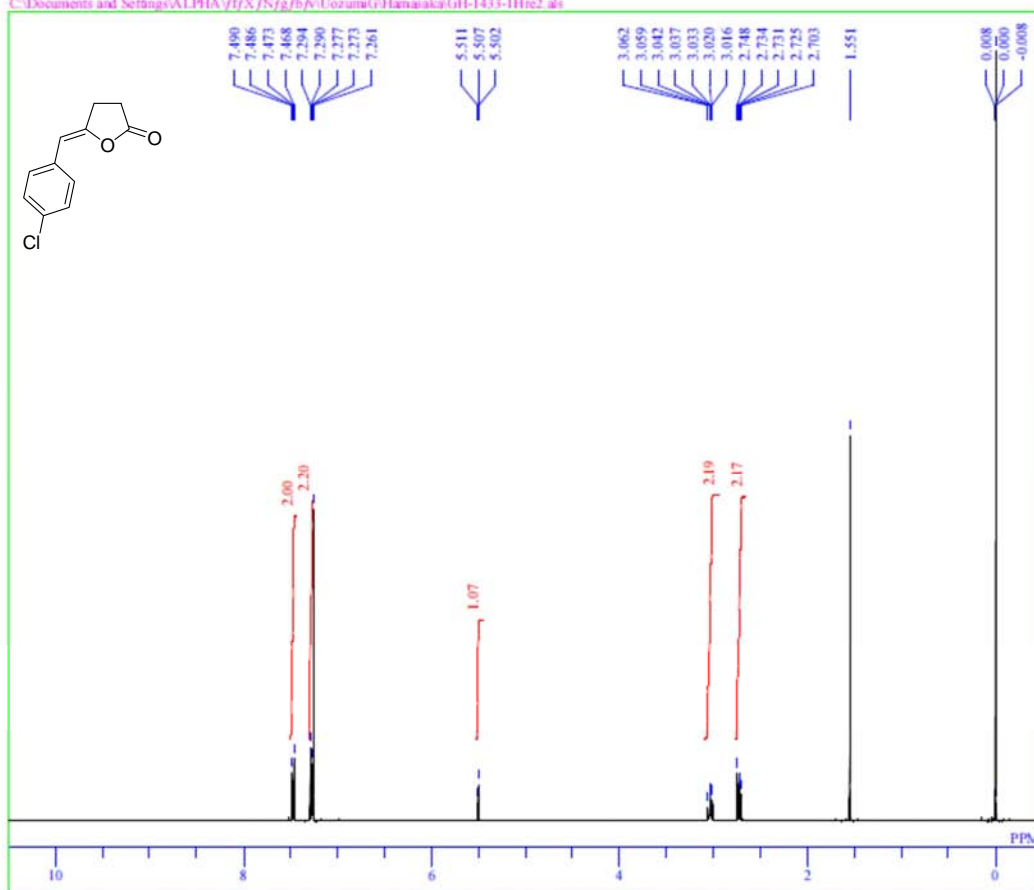

DFILE GH-1433-1Hre2.als  
COMNT GH-1433-1H  
DATIM 2013-07-05 16:39:30  
OBNUC 1H  
EXMOD proton.jxp  
OBFRQ 395.88 MHz  
OBSET 6.28 KHz  
OBFIN 0.87 Hz  
POINT 16384  
FREQU 7422.80 Hz  
SCANS 8  
ACQTM 2.2073 sec  
PD 5.0000 sec  
PWI 3.12 usec  
IRNUC 1H  
CTEMP 21.5 c  
SLVNT CDCL3  
EXREF 0.00 ppm  
BF 0.00 Hz  
RGAIN 48

GH-1433-13C

C:\Documents and Settings\ALPHA\ffX\N/g/b/v/UozumiGHamasaki\GH-1433-13C.als

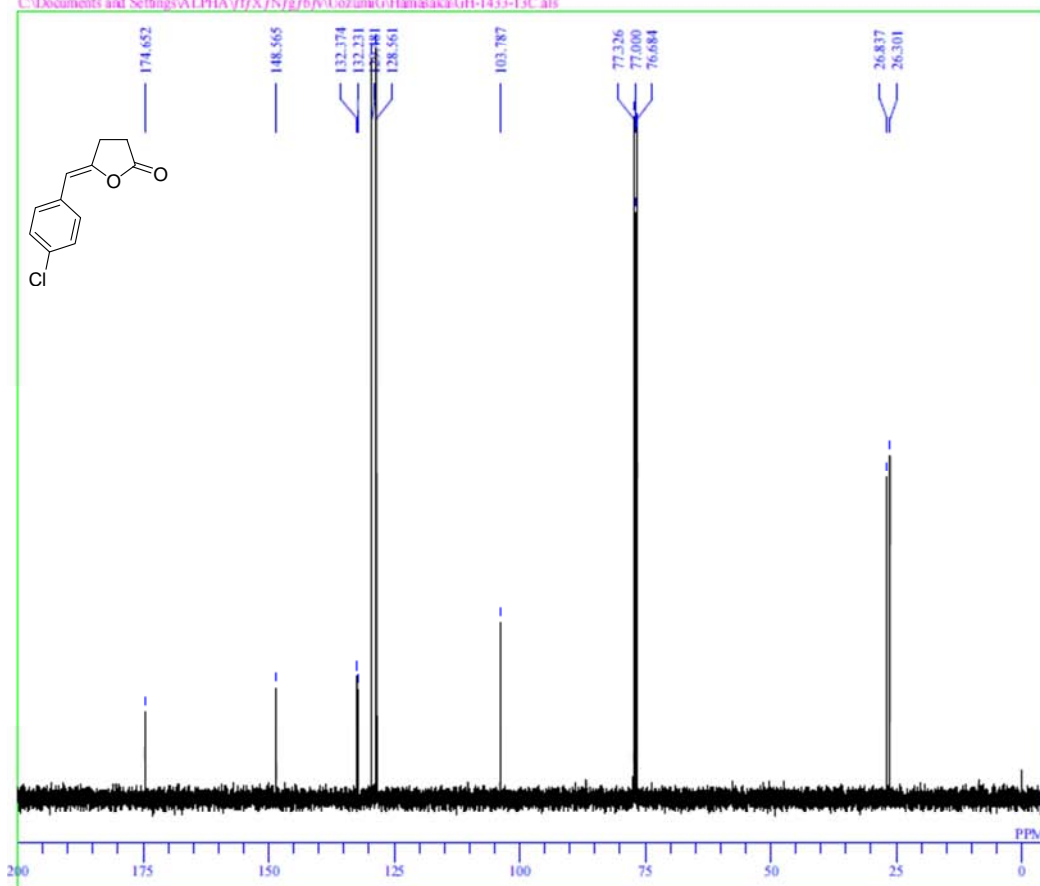

DFILE GH-1433-13C.als  
COMNT GH-1433-13C  
DATIM 2013-07-05 15:47:02  
OBNUC 13C  
EXMOD carbon.jxp  
OBFRQ 99.55 MHz  
OBSET 5.13 KHz  
OBFIN 0.98 Hz  
POINT 32767  
FREQU 31250.00 Hz  
SCANS 162  
ACQTM 1.0486 sec  
PD 2.0000 sec  
PWI 3.42 usec  
IRNUC 1H  
CTEMP 21.6 c  
SLVNT CDCL3  
EXREF 77.00 ppm  
BF 0.50 Hz  
RGAIN 60

(Z)- $\gamma$ -(2-Methylbenzylidene)- $\gamma$ -butyrolactone (**3j**)

2-MeC6H4-g-lactone-1H

C:\Documents and Settings\ALPHA\ff\X\N\g\b\Uozumi\G\Hamazaki\2-MeC6H4-g-lactone-1H.als

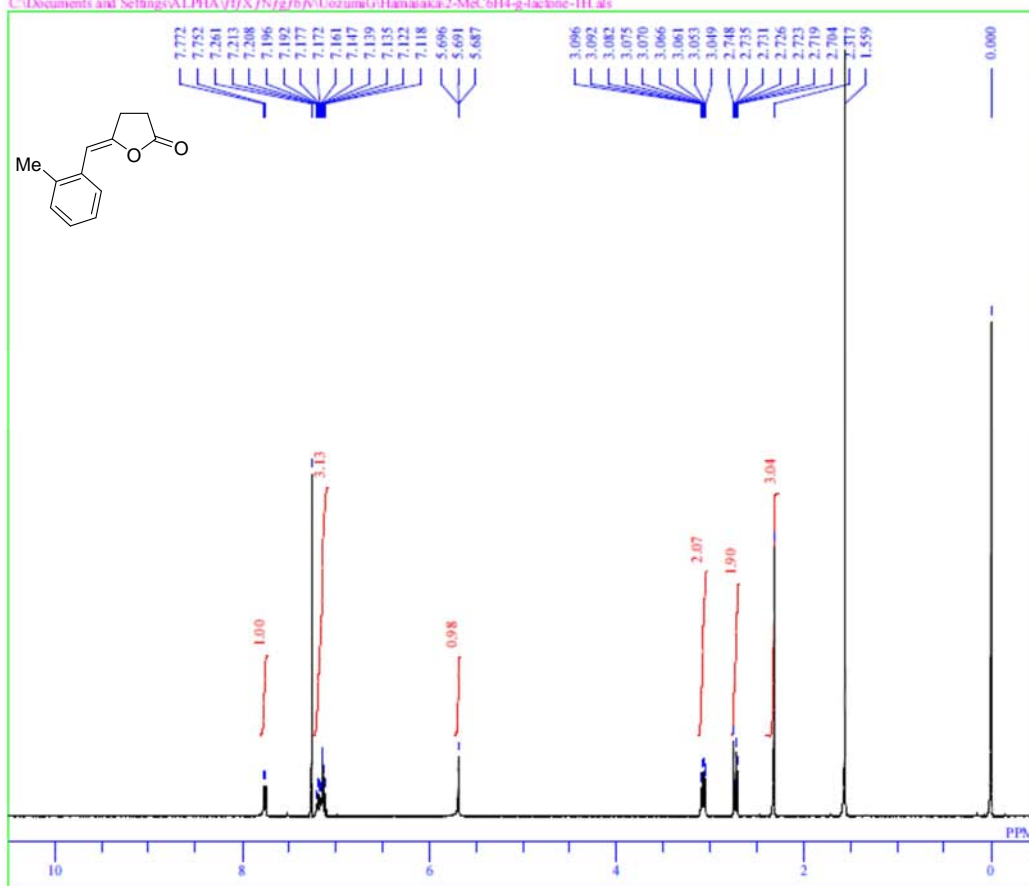

DFILE 2-MeC6H4-g-lactone-1H.als  
COMNT 2-MeC6H4-g-lactone-1H  
DATIM 2013-07-18 14:36:49  
OBNUC 1H  
EXMOD proton.jsp  
OBFREQ 395.88 MHz  
OBSET 6.28 KHz  
OBFIN 0.87 Hz  
POINT 13107  
FREQU 5938.24 Hz  
SCANS 8  
ACQTM 2.2073 sec  
PD 5.0000 sec  
PWI 3.12 usec  
IRNUC 1H  
CTEMP 21.8 c  
SLVNT CDCl3  
EXREF 0.00 ppm  
BF 0.00 Hz  
RGAIN 48

2-MeC6H4-g-lactone-13C

C:\Documents and Settings\ALPHA\ff\X\N\g\b\Uozumi\G\Hamazaki\2-MeC6H4-g-lactone-13C.als

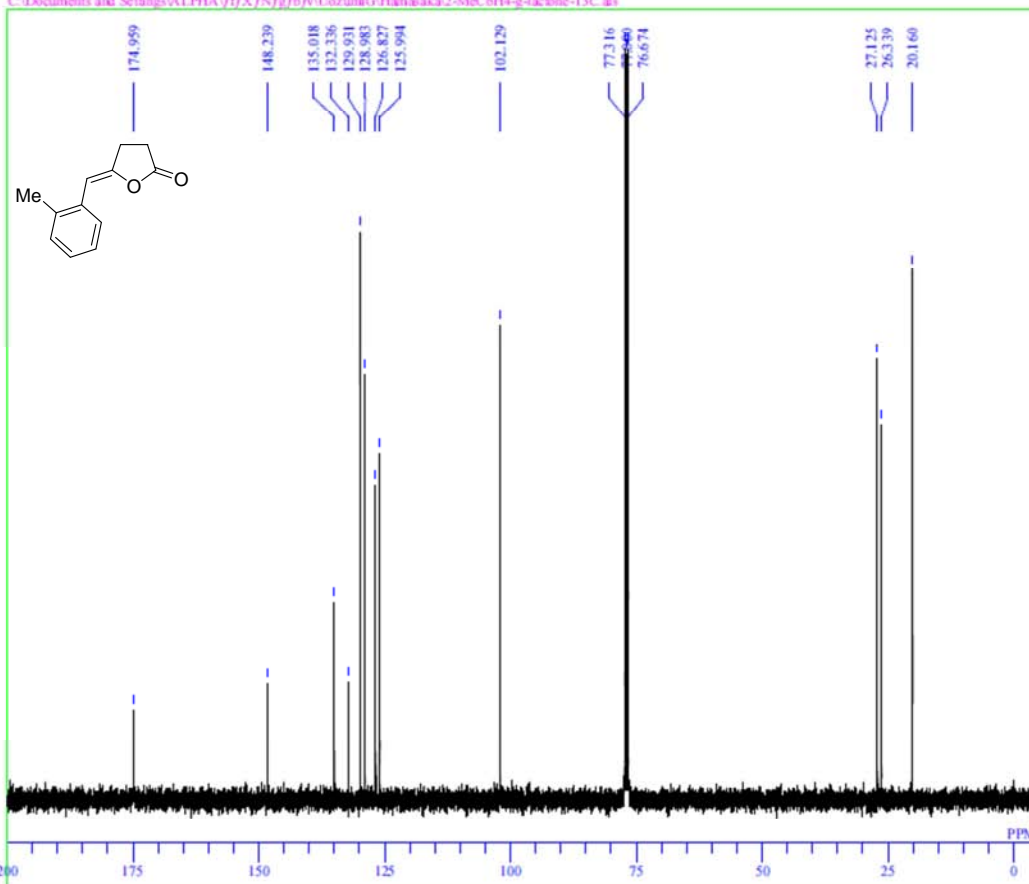

DFILE 2-MeC6H4-g-lactone-13C.als  
COMNT 2-MeC6H4-g-lactone-13C  
DATIM 2013-07-18 17:38:28  
OBNUC 13C  
EXMOD carbon.jsp  
OBFREQ 99.55 MHz  
OBSET 5.13 KHz  
OBFIN 0.98 Hz  
POINT 32767  
FREQU 31250.00 Hz  
SCANS 343  
ACQTM 1.0486 sec  
PD 2.0000 sec  
PWI 3.42 usec  
IRNUC 1H  
CTEMP 21.8 c  
SLVNT CDCl3  
EXREF 77.00 ppm  
BF 0.50 Hz  
RGAIN 60

(Z)- $\gamma$ -(1-Naphthalenylmethylene)- $\gamma$ -butyrolactone (**3k**)

Naph-g-lactone-1H

C:\Documents and Settings\ALPHA\ff\X\N\g\fb\Uozumi\G\Hamazaki\Naph-g-lactone-1H.als

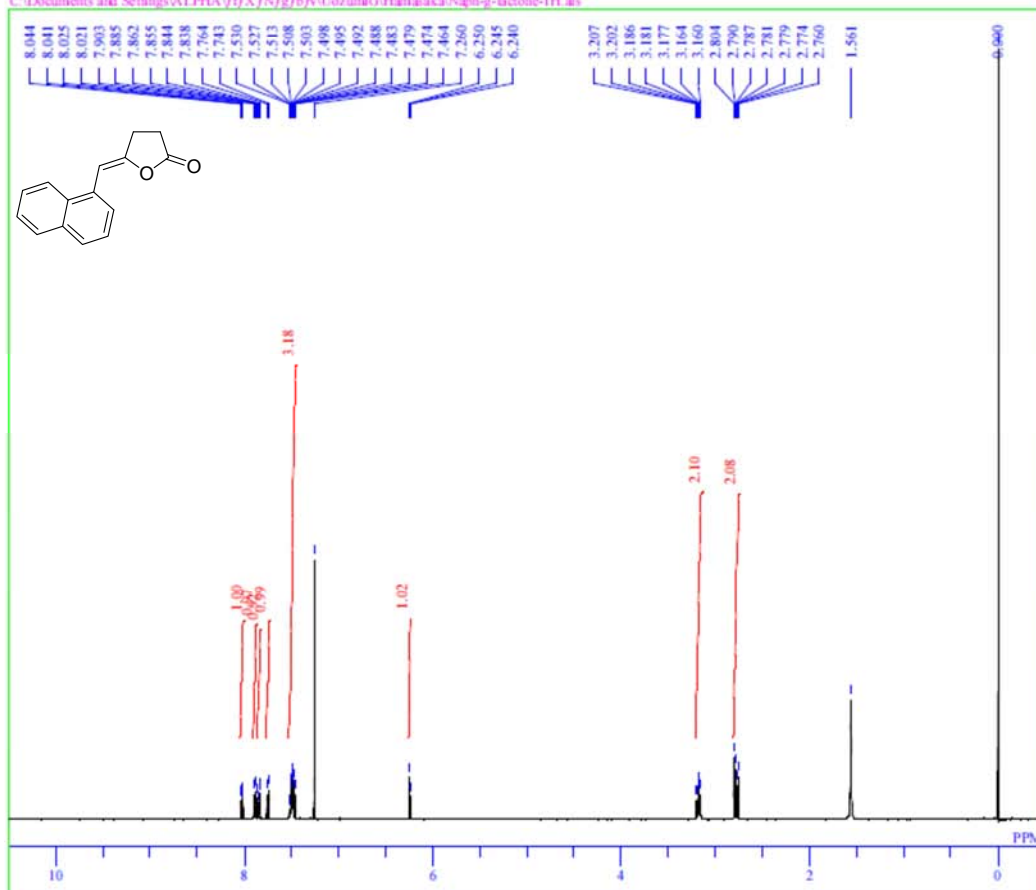

DFILE Naph-g-lactone-1H.als  
COMNT Naph-g-lactone-1H  
DATIM 2013-07-18 12:22:46  
OBNUC 1H  
EXMOD proton.jxp  
OBFRQ 395.88 MHz  
OBSET 6.28 KHz  
OBFIN 0.87 Hz  
POINT 16384  
FREQU 7422.80 Hz  
SCANS 8  
ACQTM 2.2073 sec  
PD 5.0000 sec  
PWI 3.12 usec  
IRNUC 1H  
CTEMP 21.2 c  
SLVNT CDCL3  
EXREF 0.00 ppm  
BF 0.00 Hz  
RGAIN 46

naph-g-lactone-13C

C:\Documents and Settings\ALPHA\ff\X\N\g\fb\Uozumi\G\Hamazaki\Naph-g-lactone-13C.als

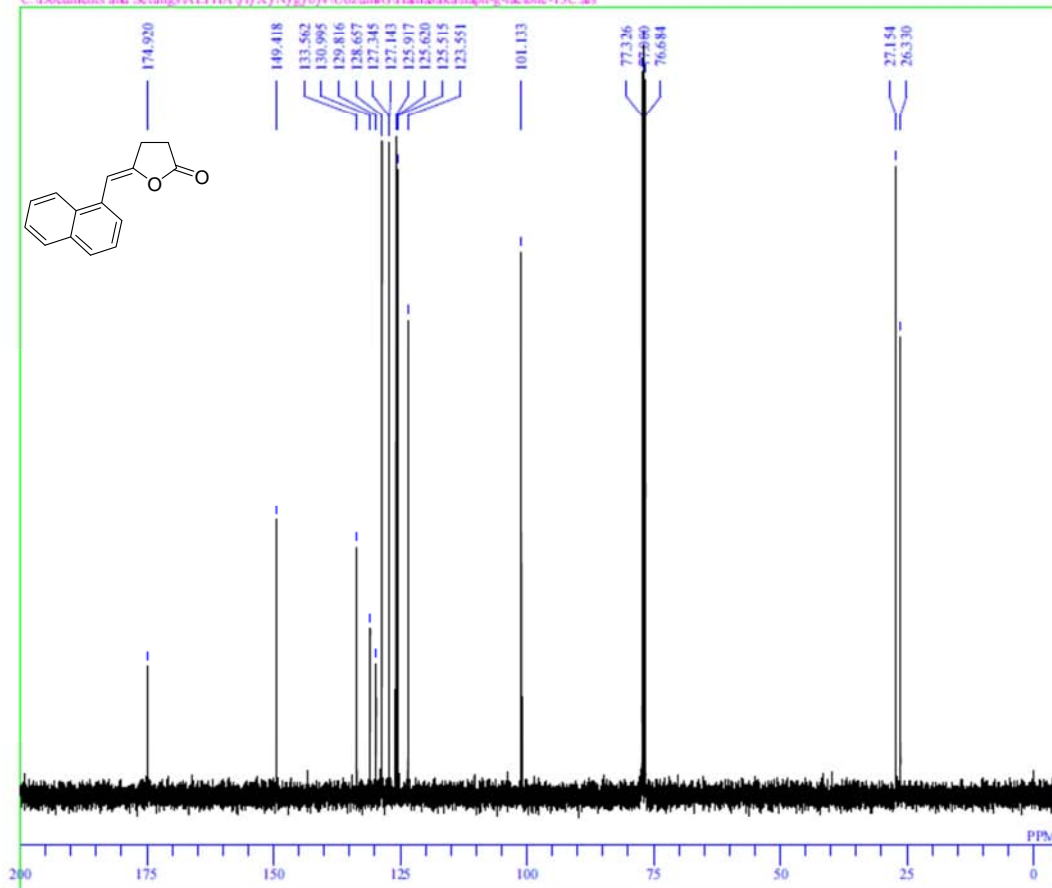

DFILE naph-g-lactone-13C.als  
COMNT naph-g-lactone-13C  
DATIM 2013-07-18 17:16:19  
OBNUC 13C  
EXMOD carbon.jxp  
OBFRQ 99.55 MHz  
OBSET 5.13 KHz  
OBFIN 0.98 Hz  
POINT 32767  
FREQU 31250.00 Hz  
SCANS 198  
ACQTM 1.0486 sec  
PD 2.0000 sec  
PWI 3.42 usec  
IRNUC 13C  
CTEMP 21.9 c  
SLVNT CDCL3  
EXREF 77.00 ppm  
BF 0.50 Hz  
RGAIN 60

(Z)- $\gamma$ -(2-Thienylmethylene)- $\gamma$ -butyrolactone (**31**)

thiophene-g-lactone-1H

C:\Documents and Settings\ALPHA\ff\X\N\g\h\Uozumi\G\Hamaoka\thiophene-g-lactone-1H.als

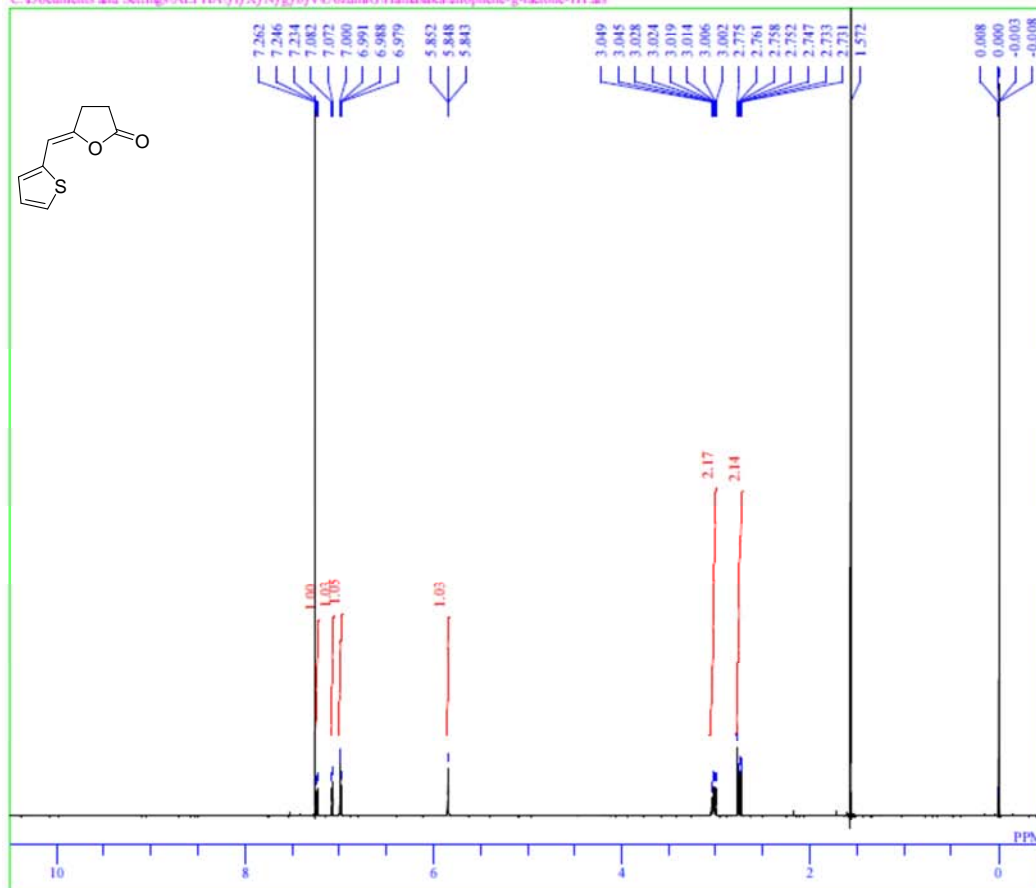

DFILE thiophene-g-lactone-1H.als  
COMNT thiophene-g-lactone-1H  
DATIM 2013-08-01 18:27:50  
OBNUC 1H  
EXMOD proton.jsp  
OBFRQ 395.88 MHz  
OBSET 6.28 KHz  
OBFIN 0.87 Hz  
POINT 16384  
FREQU 7422.80 Hz  
SCANS 8  
ACQTM 2.2073 sec  
PD 5.0000 sec  
PWI 3.12 usec  
IRNUC 1H  
CTEMP 21.9 c  
SLVNT CDCL3  
EXREF 0.00 ppm  
BF 0.00 Hz  
RGAIN 48

thiophene-g-lactone-13C

C:\Documents and Settings\ALPHA\ff\X\N\g\h\Uozumi\G\Hamaoka\thiophene-g-lactone-13C.als

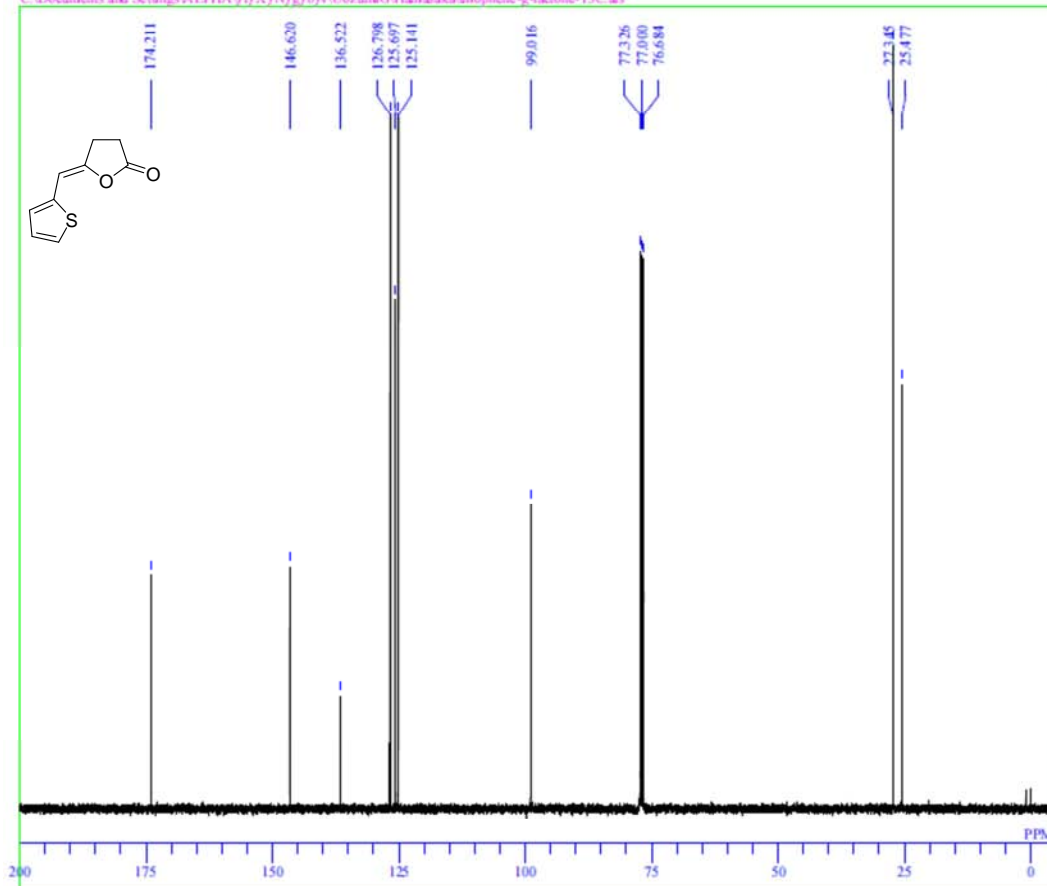

DFILE thiophene-g-lactone-13C.als  
COMNT thiophene-g-lactone-13C  
DATIM 2013-07-20 19:33:58  
OBNUC 13C  
EXMOD carbon.jsp  
OBFRQ 99.55 MHz  
OBSET 5.13 KHz  
OBFIN 0.98 Hz  
POINT 32767  
FREQU 31250.00 Hz  
SCANS 909  
ACQTM 1.0486 sec  
PD 2.0000 sec  
PWI 3.42 usec  
IRNUC 1H  
CTEMP 19.6 c  
SLVNT CDCL3  
EXREF 77.00 ppm  
BF 0.40 Hz  
RGAIN 60



# 2-Propargyloxyphenol (S3)

GH-1522-1H

C:\Documents and Settings\ALPHA\ffx\N/g/b/v/Uozumi\G\hamasaka\GH-1522-1H.als

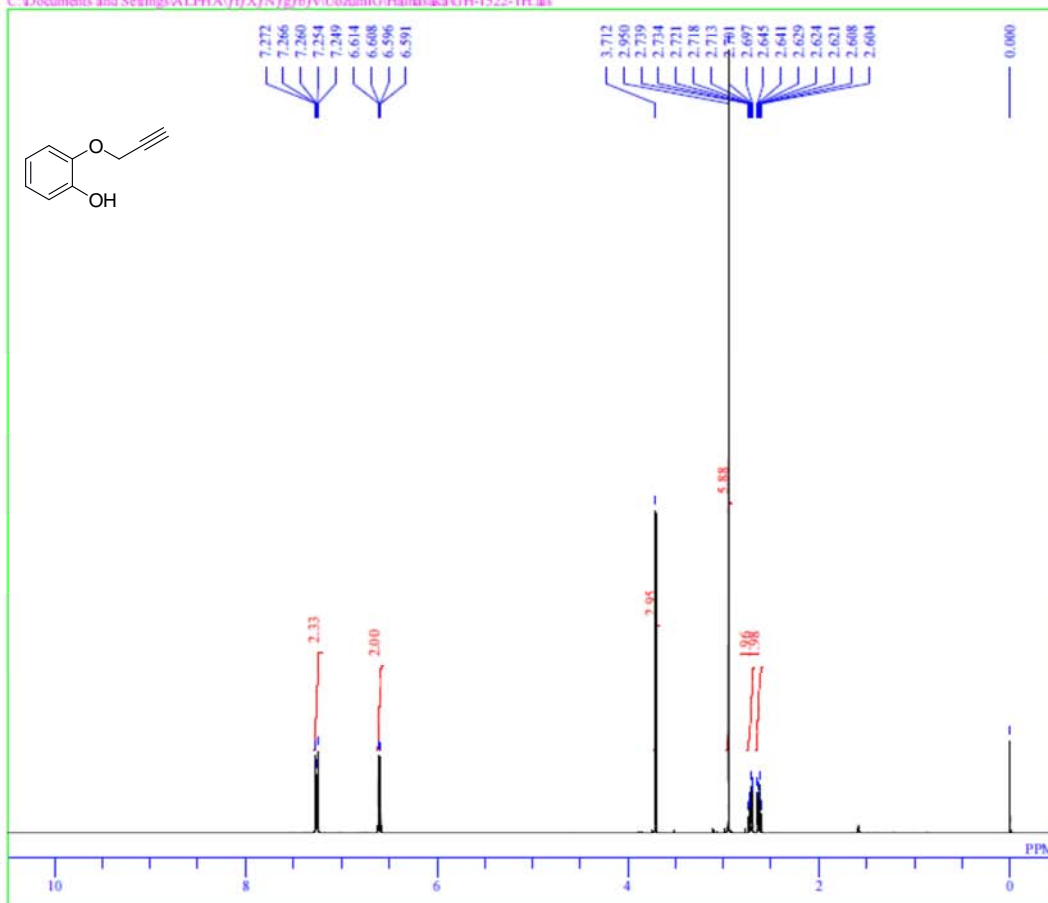

DFILE GH-1522-1H.als  
 COMNT GH-1522-1H  
 DATIM 2013-05-01 09:59:37  
 OBNUC 1H  
 EXMOD proton\_jsp  
 OBFREQ 395.88 MHz  
 OBSET 6.28 KHz  
 OBFHN 0.87 Hz  
 POINT 16384  
 FREQU 7422.80 Hz  
 SCANS 8  
 ACQTM 2.2073 sec  
 PD 5.0000 sec  
 PW1 3.12 usec  
 IRNUC 1H  
 CTEMP 19.6 c  
 SLVNT CDCL3  
 EXREF 0.00 ppm  
 BF 0.00 Hz  
 RGAIN 36

GH-1522-13C

Z:\UOZUMI\G\hamasaka\GH-1522\_carbon-1-1.jdf

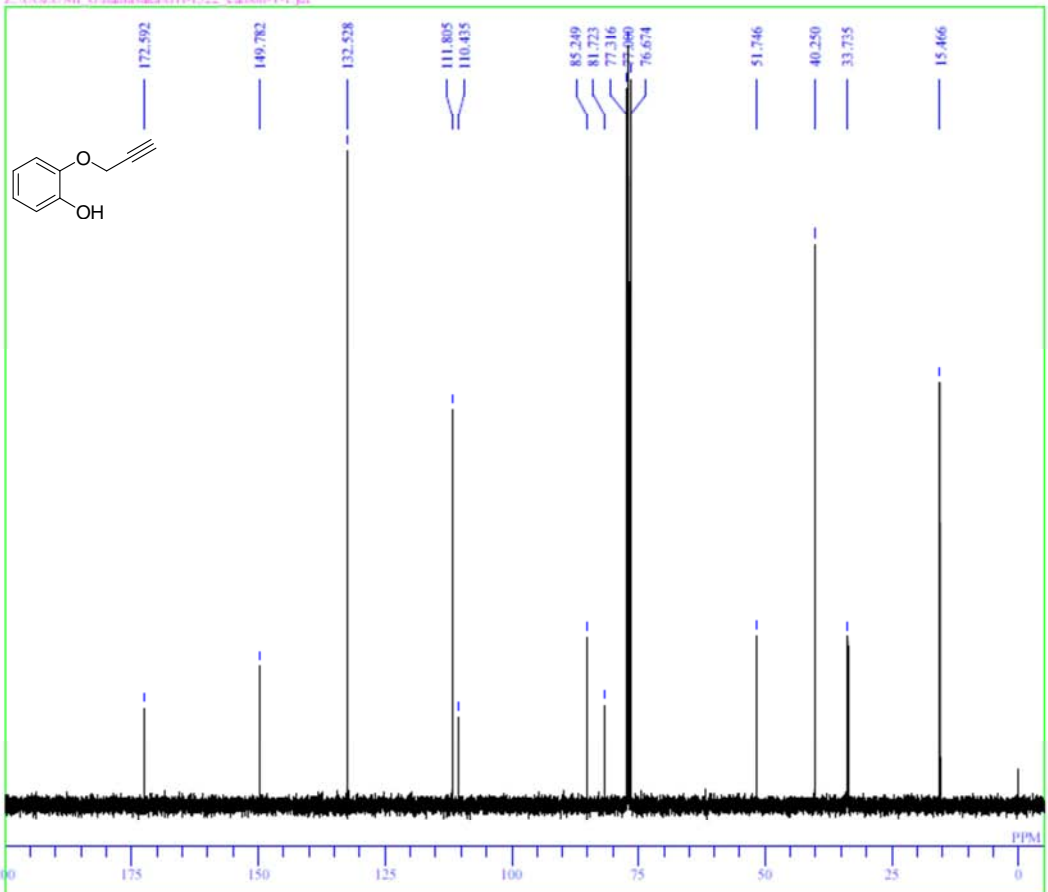

DFILE GH-1522\_carbon-1-1.jdf  
 COMNT GH-1522-13C  
 DATIM 2013-05-01 10:03:13  
 OBNUC 13C  
 EXMOD carbon\_jsp  
 OBFREQ 99.55 MHz  
 OBSET 5.13 KHz  
 OBFHN 0.98 Hz  
 POINT 32767  
 FREQU 31250.00 Hz  
 SCANS 488  
 ACQTM 1.0486 sec  
 PD 2.0000 sec  
 PW1 3.42 usec  
 IRNUC 13C  
 CTEMP 18.6 c  
 SLVNT CDCL3  
 EXREF 77.00 ppm  
 BF 0.20 Hz  
 RGAIN 60

# 1-Methoxymethoxy-2-propargyloxybenzene (S4)

GH-1553-1H

C:\Documents and Settings\ALPHA\ff\X(N\g\h\Uozumi\G\Hamusaka\GH-1553-1H.als

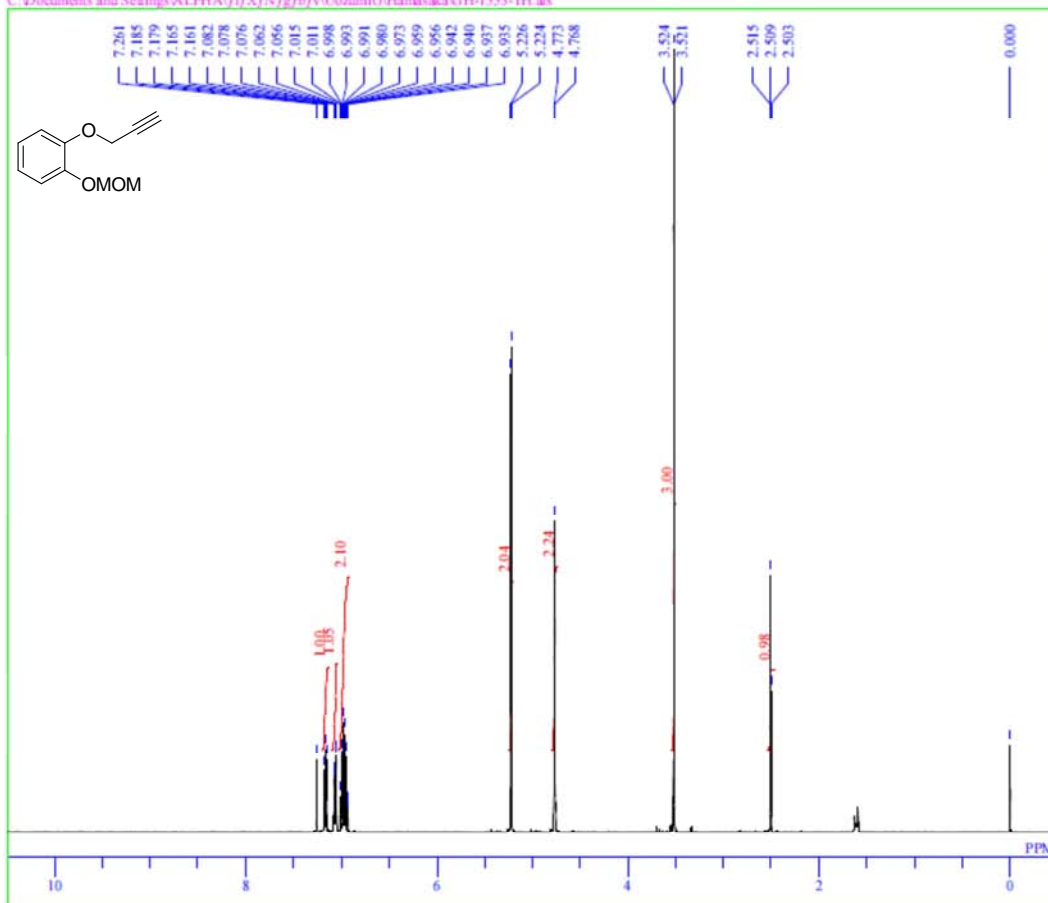

DFILE GH-1553-1H.als  
 COMNT GH-1553-1H  
 DATIM 2013-05-30 16:45:32  
 OBNUC 1H  
 EXMOD proton.jsp  
 OBFRQ 395.88 MHz  
 OBSET 6.28 KHz  
 OBFIN 0.87 Hz  
 POINT 16384  
 FREQU 7422.80 Hz  
 SCANS 8  
 ACQTM 2.2073 sec  
 PD 5.0000 sec  
 PW1 3.12 usec  
 IRNUC 1H  
 CTEMP 18.7 c  
 SLVNT CDCL3  
 EXREF 0.00 ppm  
 BF 0.00 Hz  
 RGAIN 30

GH-1553-13C

C:\Documents and Settings\ALPHA\ff\X(N\g\h\Uozumi\G\Hamusaka\GH-1553-13C.als

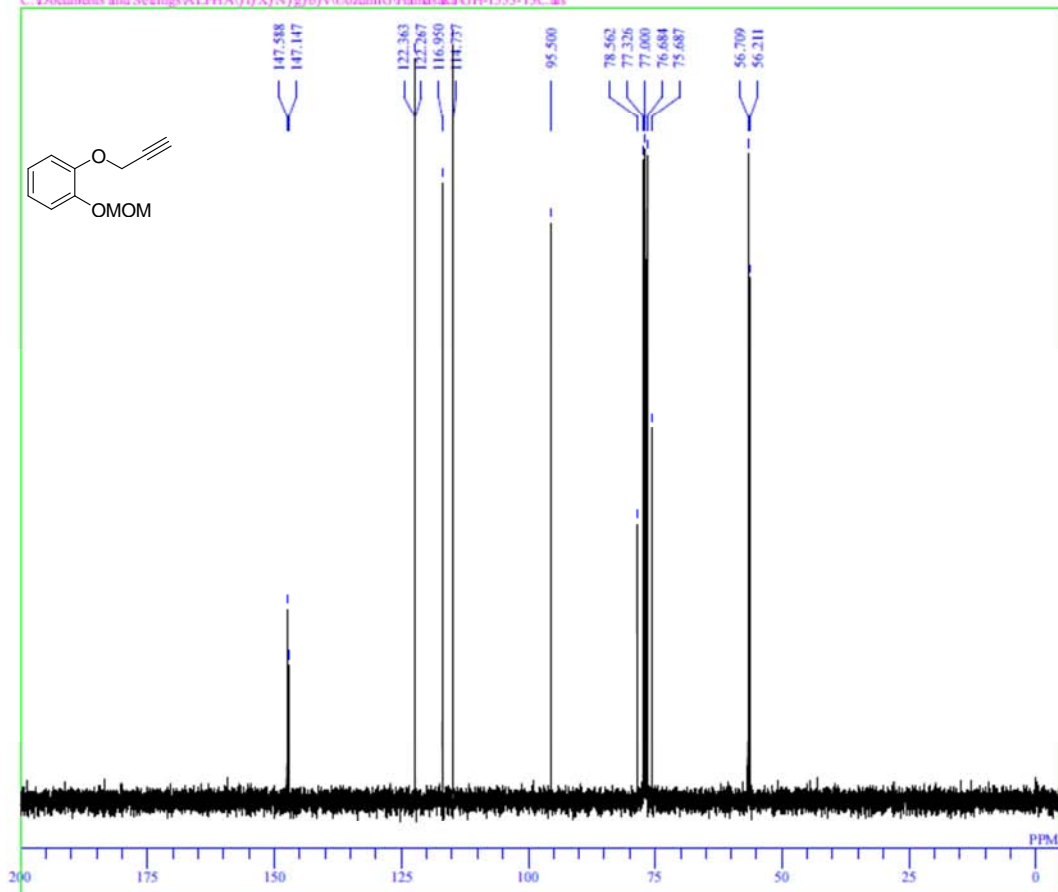

DFILE GH-1553-13C.als  
 COMNT GH-1553-13C  
 DATIM 2013-05-30 16:48:06  
 OBNUC 13C  
 EXMOD carbon.jsp  
 OBFRQ 99.55 MHz  
 OBSET 5.13 KHz  
 OBFIN 0.98 Hz  
 POINT 32767  
 FREQU 31250.00 Hz  
 SCANS 252  
 ACQTM 1.0486 sec  
 PD 2.0000 sec  
 PW1 3.42 usec  
 IRNUC 1H  
 CTEMP 19.0 c  
 SLVNT CDCL3  
 EXREF 77.00 ppm  
 BF 0.50 Hz  
 RGAIN 60

1-Methoxymethoxy-2-phenylpropargyloxybenzene (S5)

GH-1602-Fr62-68-1H

C:\Documents and Settings\ALPHA\ff\X\N\g\fb\U\ozumiG\Hansuka\GH-1602-Fr62-68-1H.als

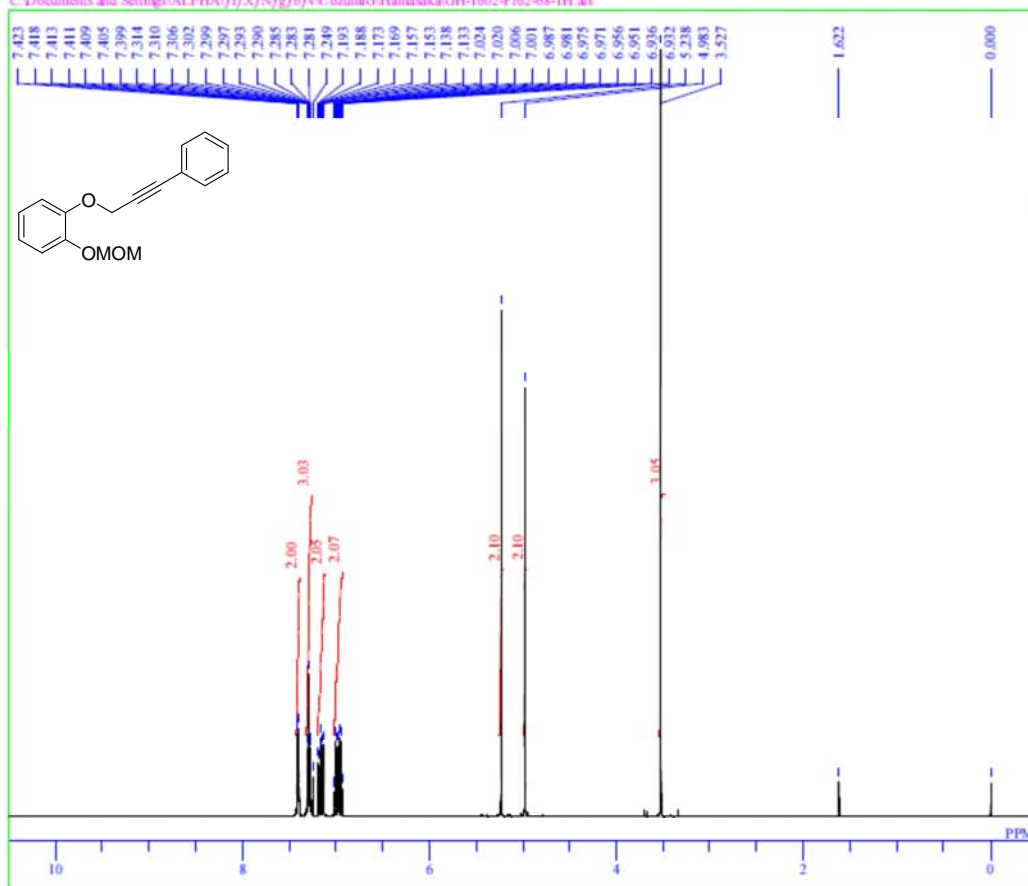

DFILE GH-1602-Fr62-68-1H.als  
 COMNT GH-1602-Fr62-68-1H  
 DATIM 2013-08-01 18:41:22  
 OBNUC 1H  
 EXMOD proton\_jxp  
 OBFREQ 395.88 MHz  
 OBSET 6.28 KHz  
 OBFIN 0.87 Hz  
 POINT 16384  
 FREQU 7422.80 Hz  
 SCANS 8  
 ACQTM 2.2073 sec  
 PD 5.0000 sec  
 PWI 3.12 usec  
 IRNUC 1H  
 CTEMP 21.8 c  
 SLVNT CDCL3  
 EXREF 0.00 ppm  
 BF 0.00 Hz  
 RGAIN 28

GH-1602-Fr62-68-13C

C:\Documents and Settings\ALPHA\ff\X\N\g\fb\U\ozumiG\Hansuka\GH-1602-Fr62-68-13C.als

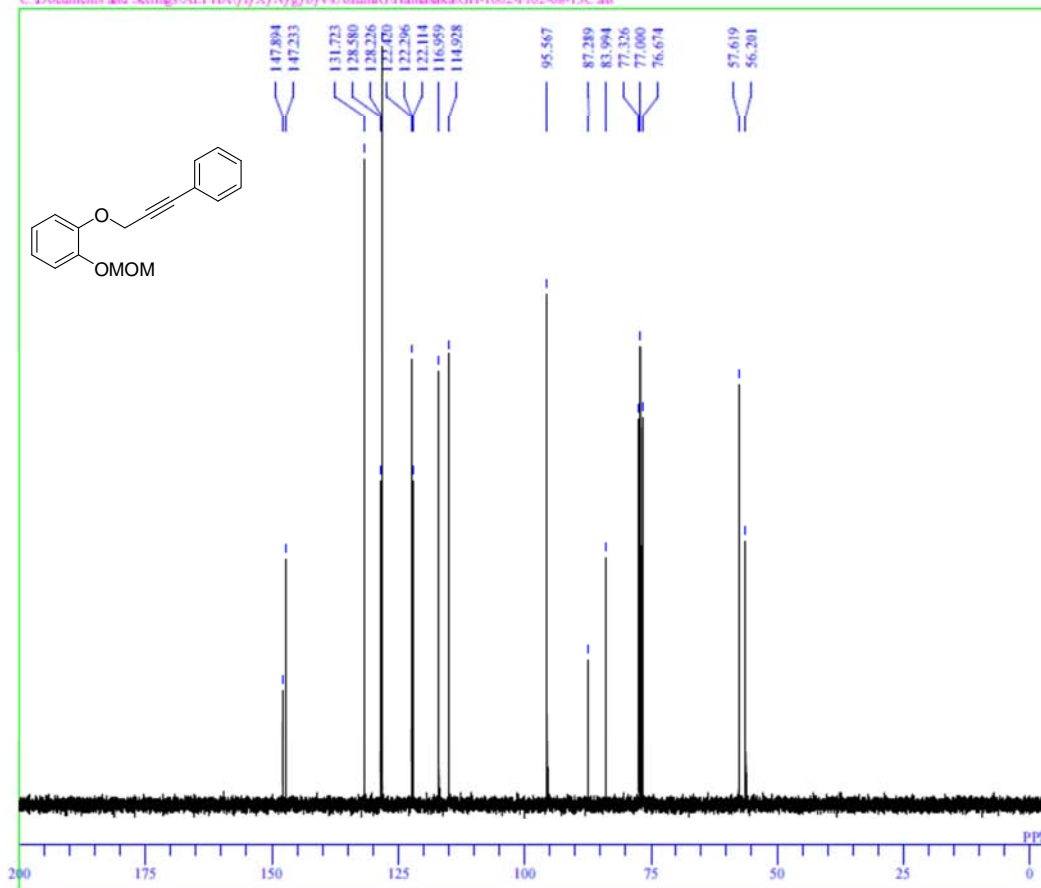

DFILE GH-1602-Fr62-68-13C.als  
 COMNT GH-1602-Fr62-68-13C  
 DATIM 2013-08-01 18:44:15  
 OBNUC 13C  
 EXMOD carbon\_jxp  
 OBFREQ 99.55 MHz  
 OBSET 5.13 KHz  
 OBFIN 0.98 Hz  
 POINT 32767  
 FREQU 31250.00 Hz  
 SCANS 251  
 ACQTM 1.0486 sec  
 PD 2.0000 sec  
 PWI 3.42 usec  
 IRNUC 1H  
 CTEMP 21.8 c  
 SLVNT CDCL3  
 EXREF 77.00 ppm  
 BF 0.40 Hz  
 RGAIN 60

2-Phenylpropargyloxyphenol (4)

GH-1604-1H

C:\Documents and Settings\ALPHA\ff\X\N\g\fb\vl\ozumi\GHamasaka\GH-1604-1H-2.als

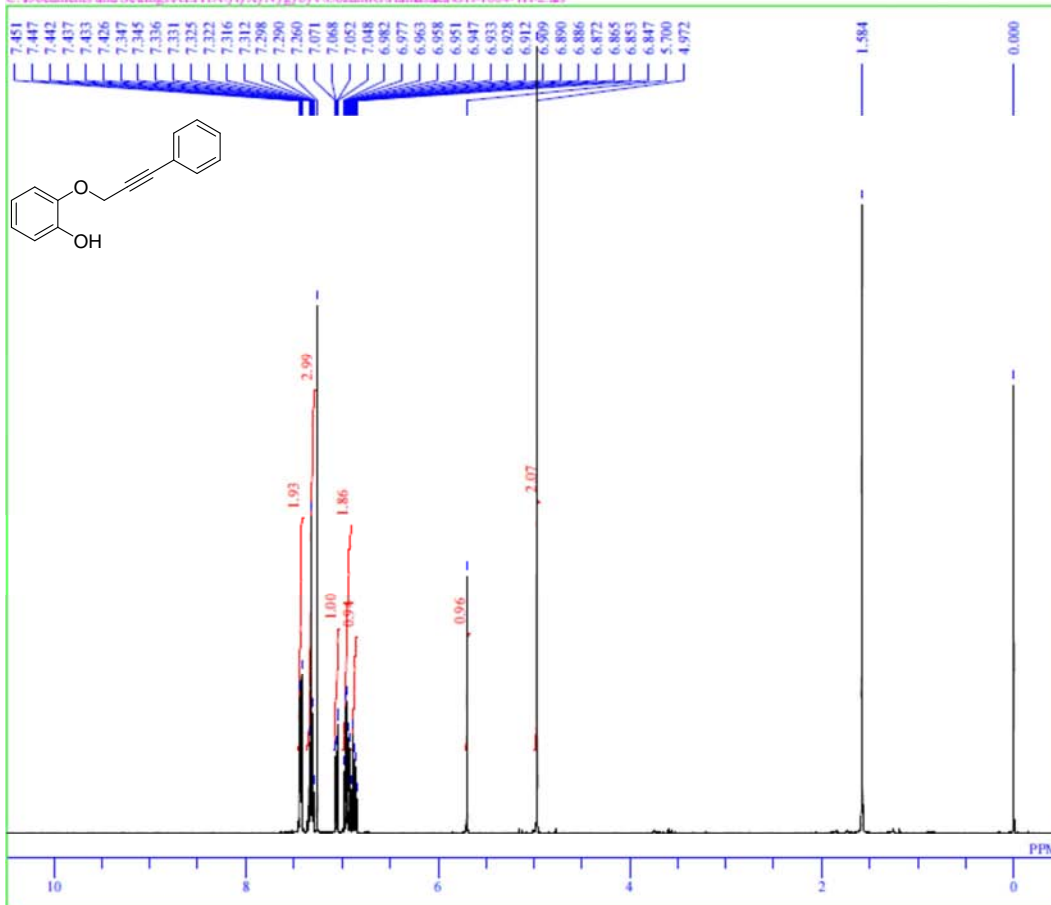

DFILE GH-1604-1H-2.als  
 COMNT GH-1604-1H  
 DATIM 2013-08-02 23:29:22  
 OBNUC 1H  
 EXMOD proton.jsp  
 OBFRQ 395.88 MHz  
 OBSET 6.28 KHz  
 OBFIN 0.87 Hz  
 POINT 16384  
 FREQU 7422.80 Hz  
 SCANS 8  
 ACQTM 2.2073 sec  
 PD 5.0000 sec  
 PW1 3.12 usec  
 IRNUC 1H  
 CTEMP 20.7 c  
 SLVNT CDCL3  
 EXREF 0.00 ppm  
 BF 0.00 Hz  
 RGAIN 42

GH-1604-13C

C:\Documents and Settings\ALPHA\ff\X\N\g\fb\vl\ozumi\GHamasaka\GH-1604-13C.als

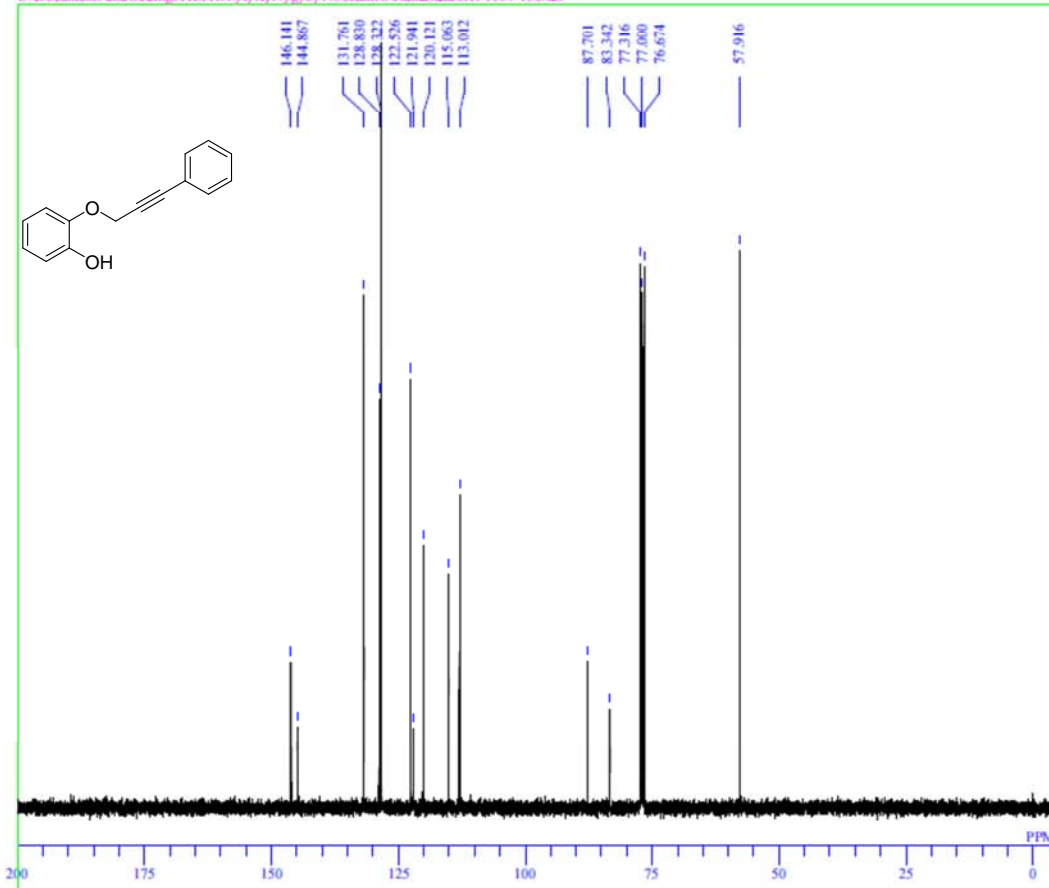

DFILE GH-1604-13C.als  
 COMNT GH-1604-13C  
 DATIM 2013-08-02 22:20:16  
 OBNUC 13C  
 EXMOD carbon.jsp  
 OBFRQ 99.55 MHz  
 OBSET 5.13 KHz  
 OBFIN 0.98 Hz  
 POINT 32767  
 FREQU 31250.00 Hz  
 SCANS 481  
 ACQTM 1.0486 sec  
 PD 2.0000 sec  
 PW1 3.42 usec  
 IRNUC 1H  
 CTEMP 20.8 c  
 SLVNT CDCL3  
 EXREF 77.00 ppm  
 BF 0.50 Hz  
 RGAIN 60

2,3-Dihydro-2-(Z)-phenylmethylene-1,4-benzodioxin (**5**)

catecol\_cyclized-1H

C:\Documents and Settings\ALPHA\ff\X\N\g\h\y\Uozumi\G\Hamsaka\catecol\_cyclized-1H.als

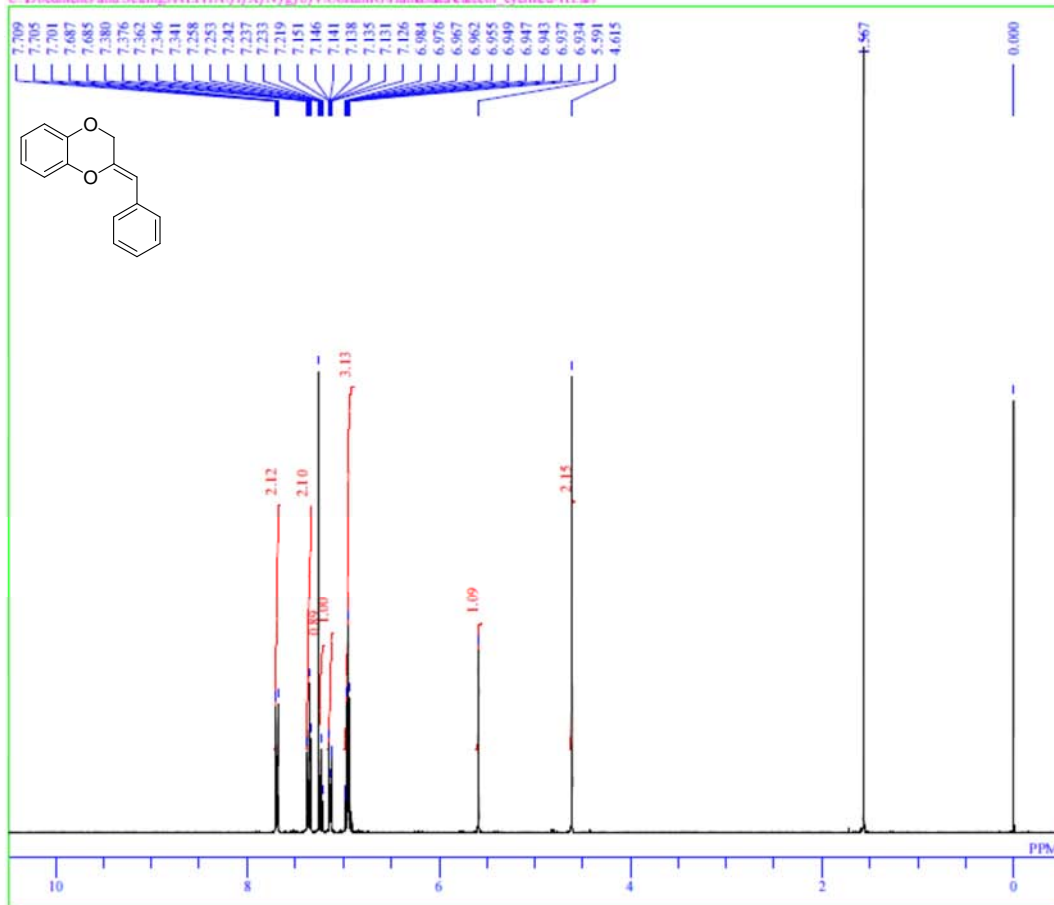

DFILE catecol\_cyclized-1H.als  
 COMNT catecol\_cyclized-1H  
 DATIM 2013-08-03 15:14:60  
 OBNUC 1H  
 EXMOD proton\_jsp  
 OBFREQ 395.88 MHz  
 OBSET 6.28 KHz  
 OBFIN 0.87 Hz  
 POINT 13107  
 FREQU 5938.24 Hz  
 SCANS 8  
 ACQTM 2.2073 sec  
 PD 5.0000 sec  
 PW1 3.12 usec  
 IRNUC 1H  
 CTEMP 20.9 c  
 SLVNT CDCL3  
 EXREF 0.00 ppm  
 BF 0.00 Hz  
 RGAIN 42

catecol\_cyclized-13C

C:\Documents and Settings\ALPHA\ff\X\N\g\h\y\Uozumi\G\Hamsaka\catecol\_cyclized-13C.als

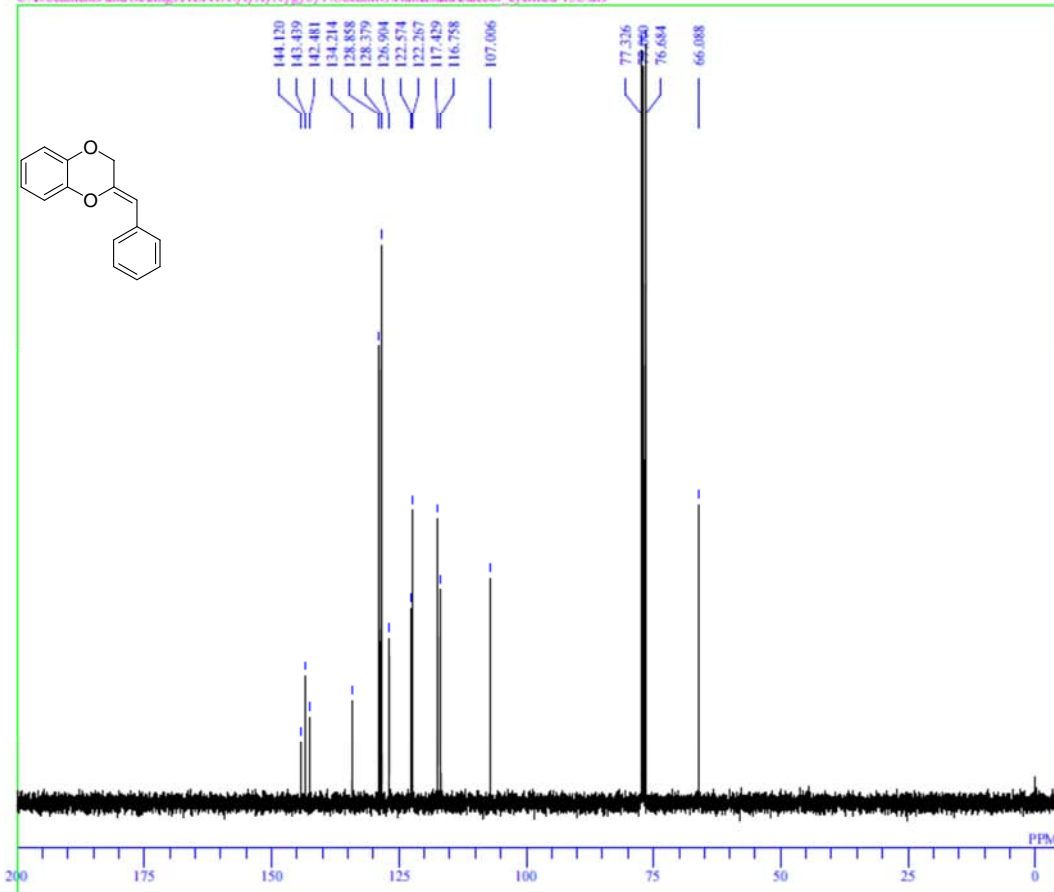

DFILE catecol\_cyclized-13C.als  
 COMNT catecol\_cyclized-13C  
 DATIM 2013-08-03 15:57:16  
 OBNUC 13C  
 EXMOD carbon\_jsp  
 OBFREQ 99.55 MHz  
 OBSET 5.13 KHz  
 OBFIN 0.98 Hz  
 POINT 32767  
 FREQU 31250.00 Hz  
 SCANS 313  
 ACQTM 1.0486 sec  
 PD 2.0000 sec  
 PW1 3.42 usec  
 IRNUC 13C  
 CTEMP 21.0 c  
 SLVNT CDCL3  
 EXREF 77.00 ppm  
 BF 0.50 Hz  
 RGAIN 60
